# Supplementary material for: Identification and analysis of lipid metabolism-related genes in allergic rhinitis
Source: Lipids Health Dis. 2023 Jul 21;22:105. doi: 10.1186/s12944-023-01825-z (PMC10362667; doi:10.1186/s12944-023-01825-z)
Supplement: Supplementary file 1 — Supplementary Materials 1: Table S1. Primer sequences for real-time fluorescence quantitative polymerase chain reaction (RT-qPCR) [file 12944_2023_1825_MOESM1_ESM.xlsx]

## Sheet: Sheet1
primer	sequences
SMARCD3 F	GCCCTGTGGCAGTATGTGAA
SMARCD3 R	CGCCGTCTTCTTCTGGTCTG
SGPP1 F	TGATTCTTATTCCCTGCTGGTGT
SGPP1 R	AATGGAGCATATTTGTGAGTTTGG
LPCAT1 F	GAAGATAGGTATTGCGGAGTTTG
LPCAT1 R	TCAATGGCTCGGAATAGGTC
Internal reference-GAPDH F	CGAAGGTGGAGTCAACGGATTT
Internal reference-GAPDH R	ATGGGTGGAATCATATTGGAAC
