# Supplementary material for: Identification and analysis of lipid metabolism-related genes in allergic rhinitis
Source: Lipids Health Dis. 2023 Jul 21;22:105. doi: 10.1186/s12944-023-01825-z (PMC10362667; doi:10.1186/s12944-023-01825-z)
Supplement: Supplementary file 2 — Supplementary Materials 2: Table S2. List of 73 lipid metabolism-related differentially expressed genes (LMR DEGs) [file 12944_2023_1825_MOESM2_ESM.xlsx]

## Sheet: Sheet1
Symbol
DEGS1
GNPAT
MED26
ARSK
PIK3C2B
MID1IP1
PPARG
GPCPD1
SGPL1
CEPT1
LPIN1
LPCAT1
MED25
PI4K2A
MED1
ACSL3
SMARCD3
DPEP3
MED10
NCOA6
MTMR3
ACAT2
INPP5D
HMGCS1
CDK8
PI4KB
SEC24B
PIK3CG
ARSG
PCTP
MBTPS1
ACOT13
PIK3R1
CH25H
PRKAG2
GK3P
PIP5K1C
PRKD2
SREBF1
MED8
KDSR
NFYA
G0S2
RORA
IDI1
SMPD4
STARD3NL
DBI
PTPMT1
INSIG1
CPT2
OLAH
LBR
FABP5
SLC10A1
SGPP1
CSNK2A1
MED14
STARD7
SMPD1
CERK
PRKACA
OSBPL10
CERS6
GPAM
PITPNB
AACS
SPTLC1
CSNK1G2
PI4K2B
SEC24A
PNPLA8
TNFAIP8L3
