# Supplementary material for: Identification and analysis of lipid metabolism-related genes in allergic rhinitis
Source: Lipids Health Dis. 2023 Jul 21;22:105. doi: 10.1186/s12944-023-01825-z (PMC10362667; doi:10.1186/s12944-023-01825-z)
Supplement: Supplementary file 3 — Supplementary Materials 3: Table S3. Results of the 256 Gene Ontology (GO) enriched terms using gene set enrichment analysis (GSEA) [file 12944_2023_1825_MOESM3_ESM.xlsx]

## Sheet: Sheet1
ID	Description	setSize	enrichmentScore	NES	pvalue	p.adjust	qvalues	rank	leading_edge	core_enrichment
GOBP_POSITIVE_REGULATION_OF_CELL_ADHESION	GOBP_POSITIVE_REGULATION_OF_CELL_ADHESION	379	0.507345	1.78649	1e-10	3.211e-07	2.77842e-07	3875	tags=39%, list=23%, signal=31%	SOCS1/SART1/PDCD1/PRKD2/NR4A3/TMEM102/SMAD7/CITED2/MYADM/CRK/CCDC88B/AP3D1/TNFRSF18/DNM2/MAP3K8/TNF/PLAUR/TNFSF14/XBP1/RUNX3/RARA/LDB1/NLRP3/SLC7A1/ADA/CD81/PREX1/CD83/STAT5B/PYCARD/RRAS/CDK6/CCR7/RELL2/LIF/PRKCQ/TMIGD2/PRKCZ/IRAK1/ADAM8/LGALS1/NCK2/SMAD3/RASAL3/CD55/FLOT2/FUT7/FLNA/BCL6/UNC13D/ILK/FMN1/FUT4/CORO1A/IL23A/AKT1/CD27/TGFBR2/LIMS2/ZMIZ1/IL23R/CARD11/IL1B/PIEZO1/ALOX5/CSK/CD74/SKAP1/S…
GOBP_LEUKOCYTE_DIFFERENTIATION	GOBP_LEUKOCYTE_DIFFERENTIATION	481	0.47837	1.70266	1e-10	3.211e-07	2.77842e-07	2550	tags=28%, list=15%, signal=24%	BCL3/SOCS1/CEBPB/SART1/TBX21/FOS/PRR7/CD101/KAT2A/JUNB/GPR137B/CCR9/TYROBP/SMAD7/TGFB1/TESC/LFNG/AP3D1/TNFRSF18/JUN/CCR6/TNF/PTGER4/RORC/ZFP36L2/NME1/XBP1/LYL1/RUNX3/RARA/BCL2/NLRP3/TSPAN2/MAPK14/ADA/CD81/BAX/ZC3H12A/GPR68/WNT1/PREX1/CD83/CMTM7/STAT5B/JMJD6/RRAS/CDK6/CCR7/LIF/PRKCZ/ADAM8/LAG3/LGALS1/TP53/IL6R/RIPK3/CTNNBIP1/SPN/FUT7/STK11/BCL6/HMGB3/ANXA2/RELB/MMP9/CCL3/FCER1G/SPI1/SBNO2/PIK3CD/I…
GOBP_T_CELL_ACTIVATION	GOBP_T_CELL_ACTIVATION	428	0.489308	1.73319	4.09315e-10	8.76208e-07	7.58167e-07	3343	tags=36%, list=20%, signal=29%	BCL3/SOCS1/CEBPB/SART1/TBX21/PDCD1/MIR27A/PRR7/TNFRSF4/KAT2A/CCR9/SMAD7/LFNG/CCDC88B/AP3D1/TNFRSF18/CCR6/MAP3K8/PTGER4/RORC/ZFP36L2/TNFSF14/XBP1/RUNX3/RARA/BCL2/WAS/NLRP3/CD7/SLC7A1/ADA/CD81/BAX/ZC3H12A/WNT1/PREX1/CD83/CCND3/STAT5B/JMJD6/PYCARD/CCR7/PRKCQ/RAC2/TMIGD2/PRKCZ/PSMB10/ADAM8/LAG3/LGALS1/TP53/NCK2/SMAD3/IL6R/RASAL3/RIPK3/CD55/FLOT2/SPN/FUT7/STK11/BCL6/RELB/TNFAIP8L2/FCER1G/PIK3CD/CORO1A…
GOBP_T_CELL_DIFFERENTIATION	GOBP_T_CELL_DIFFERENTIATION	231	0.540929	1.84405	6.25712e-09	8.83683e-06	7.64635e-06	2544	tags=34%, list=15%, signal=29%	BCL3/SOCS1/SART1/TBX21/PRR7/KAT2A/CCR9/SMAD7/LFNG/AP3D1/TNFRSF18/CCR6/PTGER4/RORC/ZFP36L2/XBP1/RUNX3/RARA/BCL2/NLRP3/ADA/ZC3H12A/WNT1/PREX1/CD83/STAT5B/JMJD6/CCR7/PRKCZ/ADAM8/LAG3/TP53/IL6R/RIPK3/SPN/FUT7/STK11/BCL6/RELB/FCER1G/PIK3CD/IL23A/PRDX2/CD27/TGFBR2/NFATC2/CHD7/TOX/ZMIZ1/IL23R/CARD11/IL1B/CD74/PATZ1/SLAMF6/ZFP36L1/LEF1/RHOH/CD3E/TCIRG1/CBFB/TCF7/NFKBID/SRF/IL12RB1/PKNOX1/EOMES/ANXA1/MAFB…
GOBP_POSITIVE_REGULATION_OF_MAPK_CASCADE	GOBP_POSITIVE_REGULATION_OF_MAPK_CASCADE	452	0.470577	1.67228	6.88012e-09	8.83683e-06	7.64635e-06	2611	tags=23%, list=16%, signal=20%	DUSP5/OSM/AVPI1/S100A12/GADD45G/MAP2K1/MIR27A/GADD45B/GADD45A/PRKD2/XCL2/NENF/TGFB1/HRAS/MAP2K2/IGFBP4/C5AR1/TNF/FGFR1/TRAF4/ARRB2/STK39/MAPK3/GNAI2/MAPK14/CD81/PRMT1/ZC3H12A/STK25/PYCARD/CCR7/RELL2/LIF/CXCR4/CCL20/SEMA4C/PRKCZ/IRAK1/TNIK/ADAM8/MDFIC/PBK/IL26/PIK3R5/DBNL/DUSP22/CCL3/ADRB2/MAP2K7/SPI1/THBS1/WNT7A/PKN1/S1PR2/PRDX2/RASSF2/MAP2K4/CD27/EPHA4/F2R/TAB1/SORBS3/ABCA7/DUSP6/PEA15/RAPGEF1/I…
GOBP_POSITIVE_REGULATION_OF_MAP_KINASE_ACTIVITY	GOBP_POSITIVE_REGULATION_OF_MAP_KINASE_ACTIVITY	217	0.539281	1.82914	9.23507e-09	9.88461e-06	8.55298e-06	2015	tags=24%, list=12%, signal=21%	DUSP5/AVPI1/S100A12/GADD45G/MAP2K1/GADD45B/GADD45A/TGFB1/HRAS/MAP2K2/C5AR1/TNF/FGFR1/STK39/MAPK3/MAPK14/CD81/CXCR4/IRAK1/TNIK/ADAM8/MDFIC/PBK/PIK3R5/DBNL/MAP2K7/THBS1/PKN1/S1PR2/PRDX2/MAP2K4/EPHA4/TAB1/DUSP6/PEA15/IL1B/PROK2/CSK/CD74/MAP2K3/TRAF7/MAPKAPK3/PPIA/MAP4K2/IKBKG/MAP3K4/MAPK11/MAPKAPK2/MAP4K1/DAXX/UBB/ERP29
GOBP_REGULATION_OF_HEMOPOIESIS	GOBP_REGULATION_OF_HEMOPOIESIS	346	0.493315	1.73074	1.15563e-08	1.06021e-05	9.17379e-06	2792	tags=32%, list=17%, signal=27%	SOCS1/CEBPB/SART1/ZFP36/TBX21/FOS/CD101/KAT2A/GPR137B/NR4A3/TYROBP/HMGB2/SMAD7/TGFB1/TESC/AP3D1/TNFRSF18/JUN/RARG/TNF/ZFP36L2/NFKBIA/NME1/XBP1/RUNX3/RARA/LDB1/NLRP3/MAPK14/ADA/PRMT1/ZC3H12A/GPR68/CD83/STAT5B/CDK6/ISG15/LIF/FAM210B/PRKCQ/PRKCZ/ADAM8/LAG3/RCOR1/ZNF16/CTNNBIP1/BCL6/HMGB3/CCL3/MOV10/SPI1/THBS1/IL23A/PRDX2/RASSF2/CD27/TOB2/HSPA1B/TGFBR2/NFATC2/IRF7/FOXO3/PRKCB/TOX/ZMIZ1/IL23R/CARD11/L…
GOBP_POSITIVE_REGULATION_OF_CELL_ACTIVATION	GOBP_POSITIVE_REGULATION_OF_CELL_ACTIVATION	297	0.497708	1.72427	1.95608e-08	1.57024e-05	1.3587e-05	3875	tags=42%, list=23%, signal=33%	CDKN1A/SOCS1/SART1/TBX21/PDCD1/TNFRSF4/TICAM1/NR4A3/TYROBP/TGFB1/CCDC88B/AP3D1/MAP3K8/TNFSF14/XBP1/RUNX3/RARA/BCL2/NLRP3/SLC7A1/ADA/CD81/CD83/FLT3LG/STAT5B/PYCARD/CCR7/PRKCQ/TMIGD2/PRKCZ/ADAM8/LGALS1/NCK2/RASAL3/CD55/FLOT2/EXOSC6/BLOC1S3/BCL6/CCL3/THBS1/CD38/CORO1A/IL23A/AKT1/CD27/TGFBR2/NFATC2/CLCF1/TOX/ZMIZ1/IL23R/CARD11/IL1B/LAMP1/CSK/CD74/TNIP2/LEF1/RHOH/CD3E/AIF1/SIRPG/CBFB/SPHK2/NFKBID/RPS6…
GOBP_CELL_CHEMOTAXIS	GOBP_CELL_CHEMOTAXIS	250	0.518118	1.78201	3.57689e-08	2.55231e-05	2.20847e-05	3435	tags=35%, list=21%, signal=28%	S100A12/DUSP1/S100A9/NR4A1/PRKD2/XCL2/CCR9/TMEM102/HMGB2/CXCR5/CRK/PDE4B/CCR6/C5AR1/BSG/FGFR1/PIP5K1C/ARRB2/STK39/MAPK3/PREX1/ABCC1/CCR7/CXCR4/PRKCQ/CCL20/RAC2/S100A8/GPSM3/CCR4/ADAM8/IL6R/RHOG/CCR5/CCL3/FCER1G/THBS1/PIK3CD/PRKCD/CORO1A/IL23A/CCR10/CXCR6/CKLF/LGALS3/IL17RC/ALOX5/CD74/HSPB1/PPIA/CXCL16/LEF1/AIF1/IL16/TMSB4X/ZNF580/HBEGF/S1PR1/CALR/CORO1B/IL10/ANXA1/VAV1/C3AR1/TPBG/VEGFB/CXCL10/MAP…
GOBP_REGULATION_OF_LYMPHOCYTE_ACTIVATION	GOBP_REGULATION_OF_LYMPHOCYTE_ACTIVATION	391	0.469367	1.65576	4.9034e-08	2.86269e-05	2.47704e-05	2700	tags=29%, list=16%, signal=25%	CDKN1A/SOCS1/CEBPB/SART1/TBX21/PDCD1/MIR27A/TNFRSF4/KAT2A/TNFAIP3/TICAM1/TYROBP/SMAD7/TGFB1/DCAF15/CCDC88B/AP3D1/TNFRSF18/MAP3K8/ZFP36L2/TNFSF14/XBP1/RUNX3/RARA/BCL2/NLRP3/SLC7A1/ADA/CD81/ZC3H12A/CD83/FLT3LG/STAT5B/PYCARD/CCR7/PRKCQ/RAC2/TMIGD2/PRKCZ/ADAM8/LAG3/LGALS1/NCK2/TBC1D10C/RASAL3/RIPK3/CD55/FLOT2/EXOSC6/BLOC1S3/SPN/BCL6/HMGB3/TNFAIP8L2/CD38/PKN1/CORO1A/IL23A/PRDX2/AKT1/CD27/DUSP3/TGFBR2/…
GOBP_REGULATION_OF_CELL_ACTIVATION	GOBP_REGULATION_OF_CELL_ACTIVATION	494	0.454524	1.62205	4.59239e-08	2.86269e-05	2.47704e-05	2700	tags=27%, list=16%, signal=23%	CDKN1A/SOCS1/CEBPB/SART1/TBX21/PDCD1/MIR27A/TNFRSF4/KAT2A/TNFAIP3/TICAM1/GPR137B/TSPAN32/NR4A3/TYROBP/SMAD7/TGFB1/DCAF15/CCDC88B/AP3D1/TNFRSF18/MAP3K8/CST7/ZFP36L2/TNFSF14/XBP1/RUNX3/RARA/BCL2/NLRP3/SLC7A1/ADA/CD81/SH2B3/ZC3H12A/CD83/FLT3LG/STAT5B/PYCARD/CCR7/PRKCQ/RAC2/TMIGD2/PRKCZ/ADAM8/LAG3/LGALS1/NCK2/TBC1D10C/RASAL3/RIPK3/GRN/CD55/FLOT2/EXOSC6/BLOC1S3/SPN/BCL6/UNC13D/HMGB3/CCL3/TNFAIP8L2/FCE…
GOBP_POSITIVE_REGULATION_OF_PROTEIN_KINASE_ACTIVITY	GOBP_POSITIVE_REGULATION_OF_PROTEIN_KINASE_ACTIVITY	480	0.44711	1.59152	6.47093e-08	3.46303e-05	2.99649e-05	3203	tags=27%, list=19%, signal=22%	CDKN1A/DUSP5/SOCS1/AVPI1/S100A12/GADD45G/MAP2K1/GADD45B/GADD45A/MAPKAP1/TGFB1/CRK/HRAS/MAP2K2/MAP3K8/C5AR1/TNF/AREG/FGFR1/TRAF4/CKS2/STK39/MAPK3/CLU/MAPK14/CD81/CCND3/CCR7/CXCR4/MLST8/ADCY3/PRKCZ/IRAK1/TNIK/ADAM8/ACE/MDFIC/IL6R/PBK/RIPK3/PIK3R5/DBNL/CALM3/CCNB1/STK11/ADRB2/MAP2K7/CDK5/THBS1/PKN1/PRKCD/IL23A/S1PR2/PRDX2/RASSF2/MAP2K4/AKT1/TGFBR2/EPHA4/PINK1/F2R/TAB1/IL23R/DUSP6/PEA15/RAPGEF1/IL1B/…
GOBP_REGULATION_OF_MAP_KINASE_ACTIVITY	GOBP_REGULATION_OF_MAP_KINASE_ACTIVITY	288	0.496579	1.72091	1.24039e-07	6.12755e-05	5.30206e-05	2742	tags=26%, list=17%, signal=22%	DUSP5/DUSP2/AVPI1/S100A12/GADD45G/MAP2K1/DUSP1/GADD45B/GADD45A/TGFB1/HRAS/MAP2K2/C5AR1/TNF/FGFR1/STK39/MAPK3/MAPK14/CD81/SH2B3/RGS14/CXCR4/IRAK1/TNIK/ADAM8/MDFIC/PBK/PIK3R5/DBNL/DUSP16/MAP2K7/THBS1/PKN1/PRKCD/S1PR2/PRDX2/MAP2K4/DUSP3/EPHA4/TAB1/DUSP6/PEA15/IL1B/PROK2/CSK/CD74/MAP2K3/LIME1/TRAF7/MAPKAPK3/PPIA/MAP4K2/IKBKG/PPP2R1A/MAP3K4/MAPK11/MAPKAPK2/MAP4K1/DAXX/UBB/DTNBP1/DUSP4/ERP29/FPR1/RPS3/…
GOBP_MYELOID_CELL_DIFFERENTIATION	GOBP_MYELOID_CELL_DIFFERENTIATION	352	0.466978	1.63947	2.20343e-07	0.000101074	8.74578e-05	2734	tags=29%, list=17%, signal=24%	CEBPB/KLF2/ZFP36/FOS/CD101/PRKX/JUNB/GPR137B/NR4A3/TYROBP/HMGB2/TGFB1/TESC/JUN/RARG/TNF/NFKBIA/NME1/KAT8/NBEAL2/RARA/LDB1/THRA/TSPAN2/MAPK14/CD81/PRMT1/SH2B3/GPR68/STAT5B/JMJD6/CDK6/CCR7/ISG15/LIF/FAM210B/PRKCQ/RCOR1/ZNF16/CTNNBIP1/BCL6/HMGB3/ANXA2/RELB/ADD1/MMP9/CCL3/MOV10/SPI1/THBS1/SBNO2/PIK3CD/IL23A/MT1G/RASSF2/TOB2/HSPA1B/TGFBR2/G6PD/IRF7/FOXO3/PRKCB/IL23R/LGALS3/HAX1/ATP6AP1/CD74/TMEM14C/ZB…
GOBP_POSITIVE_REGULATION_OF_CELL_CELL_ADHESION	GOBP_POSITIVE_REGULATION_OF_CELL_CELL_ADHESION	245	0.506504	1.73328	2.98794e-07	0.000119928	0.000103772	3875	tags=44%, list=23%, signal=35%	SOCS1/SART1/PDCD1/NR4A3/SMAD7/CITED2/CCDC88B/AP3D1/MAP3K8/TNF/PLAUR/TNFSF14/XBP1/RUNX3/RARA/NLRP3/SLC7A1/ADA/CD81/CD83/STAT5B/PYCARD/CCR7/PRKCQ/TMIGD2/PRKCZ/IRAK1/ADAM8/LGALS1/NCK2/RASAL3/CD55/FLOT2/FUT7/BCL6/FUT4/CORO1A/IL23A/AKT1/CD27/TGFBR2/ZMIZ1/IL23R/CARD11/IL1B/PIEZO1/ALOX5/CSK/CD74/SKAP1/LEF1/RHOH/CD3E/AIF1/SIRPG/CBFB/NFKBID/ADAM19/IL12RB1/IL10/ANXA1/VAV1/RELA/ZAP70/RPS3/PIK3R1/LCK/RUNX1/H…
GOBP_POSITIVE_REGULATION_OF_LOCOMOTION	GOBP_POSITIVE_REGULATION_OF_LOCOMOTION	493	0.441525	1.57473	2.81076e-07	0.000119928	0.000103772	3152	tags=27%, list=19%, signal=22%	SUN2/MIR27A/PRKD2/XCL2/NR4A3/TMEM102/MIR150/TGFB1/MYADM/ACVR1/CRK/HRAS/TNFRSF18/CCR6/C5AR1/TNF/FBXO31/FGFR1/RHOB/XBP1/MAZ/STK39/BCL2/MAPK3/SEMA4B/SEMA4D/GNAI2/TRADD/MIR590/ZC3H12A/PREX1/MGAT5/FAM89B/PYCARD/RRAS/CCR7/S100A11/CXCR4/CCL20/RAC2/SEMA4C/GPSM3/CCR4/ADAM8/PHPT1/SMAD3/ZNF304/RRAS2/IL6R/GRN/PFN1/CTSH/SPN/FLNA/MMP9/FOXO4/MIEN1/CCL3/THBS1/WNT7A/PIK3CD/CORO1A/IL23A/HDAC7/AKT1/TGFBR2/F2R/NFE2L…
GOBP_REGULATION_OF_LEUKOCYTE_DIFFERENTIATION	GOBP_REGULATION_OF_LEUKOCYTE_DIFFERENTIATION	254	0.501104	1.72561	3.40458e-07	0.000128613	0.000111287	2792	tags=31%, list=17%, signal=27%	SOCS1/CEBPB/SART1/TBX21/FOS/CD101/KAT2A/GPR137B/TYROBP/SMAD7/TGFB1/TESC/AP3D1/TNFRSF18/JUN/TNF/ZFP36L2/NME1/XBP1/RUNX3/RARA/NLRP3/ADA/ZC3H12A/GPR68/CD83/STAT5B/CDK6/LIF/PRKCZ/ADAM8/LAG3/CTNNBIP1/BCL6/HMGB3/CCL3/IL23A/PRDX2/RASSF2/CD27/TOB2/TGFBR2/NFATC2/IRF7/TOX/ZMIZ1/IL23R/CARD11/HAX1/ATP6AP1/CD74/TFE3/ZFP36L1/LEF1/RHOH/CBFB/NME2/TCF7/NFKBID/IL12RB1/HCLS1/GPR137/IL10/TCTA/GNAS/ANXA1/MAFB/ZAP70/P…
GOBP_MONONUCLEAR_CELL_DIFFERENTIATION	GOBP_MONONUCLEAR_CELL_DIFFERENTIATION	378	0.45887	1.61633	4.23588e-07	0.000151127	0.000130767	2792	tags=29%, list=17%, signal=25%	BCL3/SOCS1/CEBPB/SART1/TBX21/PRR7/KAT2A/CCR9/SMAD7/LFNG/AP3D1/TNFRSF18/JUN/CCR6/PTGER4/RORC/ZFP36L2/XBP1/LYL1/RUNX3/RARA/BCL2/NLRP3/ADA/BAX/ZC3H12A/GPR68/WNT1/PREX1/CD83/CMTM7/STAT5B/JMJD6/CDK6/CCR7/PRKCZ/ADAM8/LAG3/LGALS1/TP53/IL6R/RIPK3/CTNNBIP1/SPN/FUT7/STK11/BCL6/HMGB3/RELB/FCER1G/SPI1/PIK3CD/IL23A/PRDX2/MT1G/CD27/TGFBR2/NFATC2/IRF2BP2/IRF7/CLCF1/CHD7/TOX/ZMIZ1/IL23R/ST3GAL1/CARD11/IL1B/CD74/…
GOBP_ACTIVATION_OF_PROTEIN_KINASE_ACTIVITY	GOBP_ACTIVATION_OF_PROTEIN_KINASE_ACTIVITY	307	0.480129	1.66756	5.47898e-07	0.000185189	0.000160241	2149	tags=23%, list=13%, signal=21%	DUSP5/SOCS1/AVPI1/GADD45G/MAP2K1/GADD45B/GADD45A/MAPKAP1/CRK/MAP2K2/MAP3K8/C5AR1/TNF/TRAF4/STK39/MAPK3/MAPK14/CD81/CXCR4/MLST8/ADCY3/PRKCZ/IRAK1/TNIK/MDFIC/IL6R/PBK/RIPK3/DBNL/STK11/ADRB2/MAP2K7/THBS1/PKN1/PRKCD/IL23A/S1PR2/PRDX2/MAP2K4/AKT1/TGFBR2/PINK1/F2R/TAB1/IL23R/DUSP6/PEA15/RAPGEF1/IL1B/PROK2/CD74/MAP2K3/CLSPN/TRAF7/MAPKAPK3/LAMTOR2/PPIA/MAP4K2/IKBKG/DGKQ/MAP3K4/MINK1/MAPK11/MAPKAPK2/MAP4K…
GOBP_POSITIVE_REGULATION_OF_LEUKOCYTE_CELL_CELL_ADHESION	GOBP_POSITIVE_REGULATION_OF_LEUKOCYTE_CELL_CELL_ADHESION	211	0.514534	1.74176	8.21771e-07	0.000263871	0.000228323	3875	tags=48%, list=23%, signal=37%	SOCS1/SART1/PDCD1/NR4A3/CCDC88B/AP3D1/MAP3K8/TNF/TNFSF14/XBP1/RUNX3/RARA/NLRP3/SLC7A1/ADA/CD81/CD83/STAT5B/PYCARD/CCR7/PRKCQ/TMIGD2/PRKCZ/IRAK1/ADAM8/LGALS1/NCK2/RASAL3/CD55/FLOT2/FUT7/BCL6/FUT4/CORO1A/IL23A/AKT1/CD27/TGFBR2/ZMIZ1/IL23R/CARD11/IL1B/ALOX5/CSK/CD74/SKAP1/LEF1/RHOH/CD3E/AIF1/SIRPG/CBFB/NFKBID/IL12RB1/ANXA1/VAV1/RELA/ZAP70/RPS3/PIK3R1/LCK/RUNX1/HES1/TNFRSF13C/IL4R/IL27RA/ZBTB7B/DNAJA…
GOBP_REGULATION_OF_CELL_CELL_ADHESION	GOBP_REGULATION_OF_CELL_CELL_ADHESION	390	0.45343	1.59921	8.66025e-07	0.000264839	0.00022916	3926	tags=37%, list=24%, signal=29%	SOCS1/CEBPB/SART1/TBX21/PDCD1/MIR27A/NR4A3/SMAD7/TGFB1/CITED2/MYADM/MAPK7/CCDC88B/AP3D1/MAP3K8/TNF/PLAUR/TNFSF14/XBP1/RUNX3/RARA/NLRP3/SLC7A1/MAPK14/ADA/CD81/SH2B3/ZC3H12A/WNT1/CD83/STAT5B/PYCARD/CCR7/PRKCQ/TMIGD2/PRKCZ/IRAK1/ADAM8/LAG3/LGALS1/NCK2/RASAL3/CD55/FLOT2/SPN/FUT7/BCL6/TNFAIP8L2/FUT4/PRKCD/CORO1A/IL23A/PRDX2/AKT1/CD27/DUSP3/TGFBR2/ZMIZ1/IL23R/CARD11/IL1B/LGALS3/PIEZO1/ALOX5/CSK/CD74/SK…
GOBP_REGULATION_OF_MYELOID_CELL_DIFFERENTIATION	GOBP_REGULATION_OF_MYELOID_CELL_DIFFERENTIATION	202	0.516825	1.74073	1.06812e-06	0.000298239	0.000258061	2677	tags=33%, list=16%, signal=28%	CEBPB/ZFP36/FOS/CD101/GPR137B/NR4A3/TYROBP/HMGB2/TGFB1/TESC/JUN/RARG/TNF/NFKBIA/NME1/RARA/LDB1/MAPK14/PRMT1/GPR68/STAT5B/CDK6/ISG15/LIF/FAM210B/PRKCQ/RCOR1/ZNF16/CTNNBIP1/HMGB3/CCL3/MOV10/SPI1/THBS1/IL23A/RASSF2/TOB2/HSPA1B/IRF7/FOXO3/PRKCB/IL23R/LGALS3/HAX1/ATP6AP1/CD74/TFE3/ZFP36L1/KLF13/LEF1/EIF6/ANKRD54/CBFB/NME2/HCLS1/GPR137/TCTA/GNAS/MIR221/MAFB/PIK3R1/RUNX1/IL20/WDR5/HDAC1/ETS1/KAT2B
GOBP_GLIAL_CELL_DIFFERENTIATION	GOBP_GLIAL_CELL_DIFFERENTIATION	182	0.520234	1.7388	1.04032e-06	0.000298239	0.000258061	3290	tags=32%, list=20%, signal=26%	MAP2K1/S100A9/TGFB1/C5AR1/TNF/B4GALT5/MAPK3/CLU/TSPAN2/NAB1/MMP24/CDK6/LIF/CXCR4/S100A8/TPPP/GRN/HDAC10/PICK1/NDRG1/CDK5/AKT1/EPHA4/CLCF1/TNFRSF1B/ABCA2/NR1D1/SKI/GSN/SIRT2/NCSTN/CSK/AKT2/DAG1/LEF1/WDR1/EIF2B5/METRN/CNTNAP1/NSUN5/RELA/HES1/LDLR/EIF2B4/APP/MAPK1/HDAC1/ABL1/EIF2B2/PRDM8/EIF2B3/GSTP1/ERCC2/SPINT1/NOTCH1/ARHGEF10/C1QA/LYN
GOBP_REGULATION_OF_FAT_CELL_DIFFERENTIATION	GOBP_REGULATION_OF_FAT_CELL_DIFFERENTIATION	116	0.576181	1.85533	1.53168e-06	0.000378325	0.000327358	2671	tags=28%, list=16%, signal=23%	CEBPB/ZFP36/MIR27A/TGFB1/CREBL2/TNF/RORC/ZFP36L2/XBP1/MAPK14/METRNL/ZC3H12A/WNT1/CCDC85B/DDIT3/SMAD3/AKT1/NR1D1/SIRT2/ALOX5/PIM1/TFE3/ZFP36L1/SYAP1/MIR27B/CARM1/HES1/ZBTB7B/E2F1/PPARD/HDAC6/MMP11
GOBP_FAT_CELL_DIFFERENTIATION	GOBP_FAT_CELL_DIFFERENTIATION	193	0.523697	1.75849	1.51974e-06	0.000378325	0.000327358	2671	tags=26%, list=16%, signal=22%	SOCS1/CEBPB/NR4A2/ZFP36/MIR27A/SREBF1/NR4A1/NR4A3/TGFB1/CREBL2/TNF/RORC/ZFP36L2/XBP1/MAPK14/METRNL/ZC3H12A/WNT1/SDF4/CCDC85B/TMEM120A/DDIT3/SMAD3/CTBP1/GPX1/ADRB2/AKT1/NR1D1/CBY1/SIRT2/ALOX5/PIM1/ZBTB7A/TFE3/AKT2/ZFP36L1/ATF5/NUDT7/SYAP1/MIR27B/FABP3/CARM1/MAFB/HES1/ZBTB7B/E2F1/PPARD/HDAC6/CLIP3/RNASEL/MMP11
GOMF_CYTOKINE_ACTIVITY	GOMF_CYTOKINE_ACTIVITY	189	0.520236	1.74434	1.4258e-06	0.000378325	0.000327358	1725	tags=16%, list=10%, signal=15%	OSM/XCL2/TGFB1/CMTM3/TNFSF12/IL32/TNF/FAM3C/CMTM8/AREG/TNFSF14/LTB/IL22/WNT1/FLT3LG/CMTM7/LTA/LIF/WNT10A/CCL20/IL26/GRN/FASLG/CCL3/WNT7A/IL23A/CLCF1/CKLF/IL1B/CXCL16/IL16
GOBP_LEUKOCYTE_CELL_CELL_ADHESION	GOBP_LEUKOCYTE_CELL_CELL_ADHESION	330	0.461429	1.61157	2.6037e-06	0.000619296	0.000535865	3435	tags=36%, list=21%, signal=29%	SOCS1/CEBPB/SART1/TBX21/PDCD1/MIR27A/S100A9/NR4A3/SMAD7/CCDC88B/AP3D1/MAP3K8/TNF/TNFSF14/XBP1/RUNX3/RARA/SEMA4D/NLRP3/SLC7A1/PODXL2/ADA/CD81/TNIP1/ZC3H12A/CD83/STAT5B/PYCARD/CCR7/ITGB7/PRKCQ/RAC2/TMIGD2/PRKCZ/S100A8/IRAK1/ADAM8/LAG3/LGALS1/NCK2/RASAL3/CD55/FLOT2/SPN/FUT7/BCL6/STK10/TNFAIP8L2/FUT4/CORO1A/IL23A/PRDX2/SELPLG/AKT1/CD27/DUSP3/TGFBR2/ZMIZ1/IL23R/CARD11/IL1B/LGALS3/ALOX5/CSK/CD74/SKAP1/…
GOBP_REGULATION_OF_PROTEIN_SERINE_THREONINE_KINASE_ACTIVITY	GOBP_REGULATION_OF_PROTEIN_SERINE_THREONINE_KINASE_ACTIVITY	455	0.435724	1.55036	2.97733e-06	0.000682871	0.000590876	2913	tags=25%, list=18%, signal=22%	CDKN1A/DUSP5/DUSP2/AVPI1/S100A12/GADD45G/MAP2K1/DUSP1/GADD45B/MEN1/SESN2/GADD45A/TNFAIP3/TGFB1/HRAS/MAP2K2/C5AR1/TNF/FGFR1/CKS2/STK39/MAPK3/MAPK14/CD81/SH2B3/RGS14/CCND3/PYCARD/CXCR4/MLST8/IRAK1/TNIK/ADAM8/MDFIC/SERTAD1/PBK/PIK3R5/CCNE1/DBNL/CDKN2D/CALM3/CCNB1/DUSP16/ADRB2/MAP2K7/THBS1/PKN1/PRKCD/S1PR2/PRDX2/MAP2K4/AKT1/DUSP3/EPHA4/TAB1/DUSP6/PEA15/IL1B/MTCP1/PROK2/CDC37/CSK/CD74/HSPB1/MAP2K3/LIM…
GOBP_LEUKOCYTE_MIGRATION	GOBP_LEUKOCYTE_MIGRATION	396	0.438375	1.55082	3.21163e-06	0.000711211	0.000615398	3435	tags=29%, list=21%, signal=23%	TBX21/S100A12/SLC7A5/DUSP1/S100A9/XCL2/TMEM102/TGFB1/CXCR5/CRK/TNFRSF18/PDE4B/CCR6/C5AR1/TNF/BSG/PTGER4/PIP5K1C/PIK3R2/STK39/MAPK3/NLRP3/PODXL2/ADA/CD81/PREX1/STAT5B/PYCARD/CCR7/ITGB7/CXCR4/CCL20/RAC2/SLC16A3/S100A8/GPSM3/ADAM8/IL6R/RIPK3/SPN/FUT7/RHOG/CCR5/MMP9/CCL3/STK10/B4GALT1/FCER1G/THBS1/PIK3CD/FUT4/CORO1A/IL23A/SELPLG/AKT1/MYO1G/CKLF/LGALS3/IL17RC/ALOX5/CD74/GLG1/PPIA/CXCL16/RHOH/WDR1/AIF1…
GOBP_CD4_POSITIVE_ALPHA_BETA_T_CELL_ACTIVATION	GOBP_CD4_POSITIVE_ALPHA_BETA_T_CELL_ACTIVATION	92	0.589696	1.84045	5.05781e-06	0.00104648	0.000905499	2544	tags=39%, list=15%, signal=33%	BCL3/SOCS1/TBX21/SMAD7/PTGER4/RORC/RUNX3/RARA/NLRP3/CD81/ZC3H12A/CD83/PRKCQ/PRKCZ/IL6R/CD55/SPN/FUT7/BCL6/RELB/IL23A/TGFBR2/TOX/IL23R/SLAMF6/LEF1/TCIRG1/STOML2/CBFB/NFKBID/IL12RB1/ANXA1/RUNX1/IL4R/ZBTB7B/NFKBIZ
GOBP_ACTIVATION_OF_MAPK_ACTIVITY	GOBP_ACTIVATION_OF_MAPK_ACTIVITY	147	0.539165	1.76763	5.05612e-06	0.00104648	0.000905499	2149	tags=27%, list=13%, signal=23%	DUSP5/AVPI1/MAP2K1/MAP2K2/C5AR1/TNF/STK39/MAPK3/MAPK14/CD81/CXCR4/IRAK1/MDFIC/PBK/DBNL/MAP2K7/THBS1/PKN1/S1PR2/PRDX2/MAP2K4/TAB1/DUSP6/PEA15/IL1B/PROK2/CD74/MAP2K3/MAPKAPK3/PPIA/MAP4K2/IKBKG/MAPK11/MAPKAPK2/MAP4K1/DAXX/UBB/ERP29/FPR1
GOBP_POSITIVE_REGULATION_OF_HEMOPOIESIS	GOBP_POSITIVE_REGULATION_OF_HEMOPOIESIS	142	0.538359	1.76207	5.37742e-06	0.00104648	0.000905499	2544	tags=34%, list=15%, signal=29%	SOCS1/SART1/FOS/CD101/TYROBP/TGFB1/TESC/AP3D1/JUN/TNF/XBP1/RUNX3/RARA/NLRP3/ADA/GPR68/CD83/STAT5B/LIF/PRKCZ/ADAM8/CTNNBIP1/BCL6/IL23A/CD27/TGFBR2/TOX/ZMIZ1/IL23R/HAX1/ATP6AP1/CD74/ZFP36L1/LEF1/RHOH/CBFB/NFKBID/IL12RB1/HCLS1/IL10/GNAS/ANXA1/ZAP70/RUNX1/IL4R/IL20/ZBTB7B/NFKBIZ
GOBP_MONOSACCHARIDE_METABOLIC_PROCESS	GOBP_MONOSACCHARIDE_METABOLIC_PROCESS	240	0.481071	1.64457	5.21729e-06	0.00104648	0.000905499	2921	tags=32%, list=18%, signal=26%	SIK1/PFKFB3/SESN2/KAT2A/CREM/PGP/PHLDA2/SLC2A3/SIRT7/IGFBP4/TNF/FAM3C/PPP1R3D/DCXR/RORC/SLC25A1/MAPK14/POMC/CLK2/WDTC1/GALK1/MIDN/TP53/MPI/GLYCTK/SLC25A11/PPP1CA/G6PC3/FUT7/B4GALT1/PASK/FUT4/TALDO1/PPP1R3F/GALT/KHK/AKT1/TPI1/G6PD/ENO1/FAM3A/PGD/AKR1B1/PGAM2/AKR1A1/H6PD/SLC25A10/ATF3/CYB5R3/AKT2/CYB5A/INPPL1/DGKQ/PDHB/SLC35A2/GOT1/GAPDH/RBKS/PC/GAA/GALM/SLC2A1/NUDT5/XYLB/PFKL/PPARD/ALDOC/MLYCD/WDR…
GOBP_ALPHA_BETA_T_CELL_ACTIVATION	GOBP_ALPHA_BETA_T_CELL_ACTIVATION	138	0.542804	1.76947	5.6685e-06	0.00107068	0.00092644	2611	tags=33%, list=16%, signal=28%	BCL3/SOCS1/TBX21/PRR7/SMAD7/AP3D1/PTGER4/RORC/RUNX3/RARA/BCL2/NLRP3/ADA/CD81/ZC3H12A/CD83/PRKCQ/PRKCZ/IL6R/RASAL3/CD55/SPN/FUT7/BCL6/RELB/IL23A/TGFBR2/TOX/IL23R/ELF4/SLAMF6/LEF1/CD3E/TCIRG1/STOML2/CBFB/NFKBID/IL12RB1/EOMES/ANXA1/ZAP70/RUNX1/IL4R/ZBTB7B/NFKBIZ/ABL1
GOBP_NEGATIVE_REGULATION_OF_PHOSPHORUS_METABOLIC_PROCESS	GOBP_NEGATIVE_REGULATION_OF_PHOSPHORUS_METABOLIC_PROCESS	463	0.421488	1.49955	5.99663e-06	0.0011003	0.000952067	2919	tags=24%, list=18%, signal=21%	CDKN1A/DUSP5/SOCS1/DUSP2/SOCS3/DDIT4/FKBP8/DUSP1/MEN1/GADD45A/MYO1D/PPP1R15A/TNFAIP3/WDR81/SMAD7/TGFB1/CHMP6/MYADM/LPCAT1/TESC/TNF/BOD1/PPP1R35/ARRB2/SEMA4D/GNAI2/BAX/SH2B3/ZC3H12A/MGAT5/RGS14/PPP1R9B/ZFYVE28/PYCARD/SH3BP5/PARD6A/MIDN/VPS25/PPP1R14B/PRKCZ/SH3BP5L/TP53/NCK2/PBK/CSRNP2/DVL1/CDKN2D/CALM3/CCNB1/DUSP16/AKT1S1/DUSP22/PKN1/PRKCD/RASSF2/AKT1/MLLT1/DUSP3/MVP/PPP1R14A/URI1/ABCA2/DUSP6/IL1B…
GOBP_MYOTUBE_DIFFERENTIATION	GOBP_MYOTUBE_DIFFERENTIATION	85	0.608476	1.87058	6.58806e-06	0.00116301	0.00100633	4205	tags=38%, list=25%, signal=28%	SIK1/RBM38/XBP1/BCL2/MAPK14/CD81/TMEM119/WNT1/GPX1/NFATC2/PLD3/SKI/BCL9/PPP3CA/ADAM12/EHD1/PLEKHO1/DYRK1B/SCGB3A1/IL4R/CXCL10/MYH9/TANC1/NOTCH1/CD53/MAMSTR/FLOT1/LMOD3/CD9/KLF5/HDAC4/DMPK
GOBP_POSITIVE_REGULATION_OF_PROTEIN_SERINE_THREONINE_KINASE_ACTIVITY	GOBP_POSITIVE_REGULATION_OF_PROTEIN_SERINE_THREONINE_KINASE_ACTIVITY	288	0.465494	1.61319	6.88172e-06	0.00116301	0.00100633	2913	tags=27%, list=18%, signal=23%	DUSP5/AVPI1/S100A12/GADD45G/MAP2K1/GADD45B/GADD45A/TGFB1/HRAS/MAP2K2/C5AR1/TNF/FGFR1/CKS2/STK39/MAPK3/MAPK14/CD81/CCND3/CXCR4/MLST8/IRAK1/TNIK/ADAM8/MDFIC/PBK/PIK3R5/DBNL/CALM3/CCNB1/ADRB2/MAP2K7/THBS1/PKN1/S1PR2/PRDX2/MAP2K4/AKT1/EPHA4/TAB1/DUSP6/PEA15/IL1B/MTCP1/PROK2/CSK/CD74/MAP2K3/TRAF7/MAPKAPK3/PPIA/MAP4K2/IKBKG/MAP3K4/SYAP1/MAPK11/MAPKAPK2/MAP4K1/DAXX/UBB/ERP29/CCNY/FPR1/CAB39L/RPS3/MNAT1/…
GOBP_REGULATION_OF_T_CELL_ACTIVATION	GOBP_REGULATION_OF_T_CELL_ACTIVATION	296	0.464296	1.60833	6.88172e-06	0.00116301	0.00100633	3343	tags=35%, list=20%, signal=29%	SOCS1/CEBPB/SART1/TBX21/PDCD1/MIR27A/KAT2A/SMAD7/CCDC88B/AP3D1/TNFRSF18/MAP3K8/TNFSF14/XBP1/RUNX3/RARA/NLRP3/SLC7A1/ADA/CD81/ZC3H12A/CD83/STAT5B/PYCARD/CCR7/PRKCQ/RAC2/TMIGD2/PRKCZ/ADAM8/LAG3/LGALS1/NCK2/RASAL3/RIPK3/CD55/FLOT2/SPN/BCL6/TNFAIP8L2/CORO1A/IL23A/PRDX2/AKT1/CD27/DUSP3/TGFBR2/NFATC2/TNFRSF1B/TOX/ZMIZ1/IL23R/CARD11/IL1B/LGALS3/CSK/CD74/LAT/LEF1/RHOH/CD3E/AIF1/SIRPG/CBFB/TCF7/NFKBID/IL1…
GOBP_REGULATION_OF_STRIATED_MUSCLE_CELL_DIFFERENTIATION	GOBP_REGULATION_OF_STRIATED_MUSCLE_CELL_DIFFERENTIATION	71	0.624336	1.86716	9.66098e-06	0.00159084	0.00137653	1238	tags=20%, list=8%, signal=18%	SIK1/RBM38/KAT2A/CTDP1/TGFB1/XBP1/ARRB2/BCL2/PI16/MAPK14/TMEM119/MIR590/PIN1/G6PD
GOBP_ALPHA_BETA_T_CELL_DIFFERENTIATION	GOBP_ALPHA_BETA_T_CELL_DIFFERENTIATION	102	0.578372	1.83148	1.01357e-05	0.00162729	0.00140806	2611	tags=37%, list=16%, signal=32%	BCL3/SOCS1/TBX21/PRR7/SMAD7/AP3D1/PTGER4/RORC/RUNX3/RARA/BCL2/NLRP3/ADA/ZC3H12A/CD83/PRKCZ/IL6R/SPN/FUT7/BCL6/RELB/IL23A/TGFBR2/TOX/IL23R/SLAMF6/LEF1/CBFB/NFKBID/IL12RB1/EOMES/ANXA1/ZAP70/RUNX1/IL4R/ZBTB7B/NFKBIZ/ABL1
GOBP_MUSCLE_TISSUE_DEVELOPMENT	GOBP_MUSCLE_TISSUE_DEVELOPMENT	297	0.449154	1.55606	1.27616e-05	0.0019989	0.00172961	2216	tags=19%, list=13%, signal=16%	SIK1/FOS/MYOM2/MSC/KAT2A/BTG2/CTDP1/SAP30/SMAD7/TGFB1/ACVR1/LEMD2/ARRB2/BCL2/PI16/MAPK14/MIR590/MAFF/SMAD1/SMAD3/EMD/CCNB1/PIN1/GPX1/CDK5/TNNC1/MAP2K4/TGFBR2/KDM6B/G6PD/HMG20B/CHD7/CBY1/SKI/SIRT2/HLF/PIM1/BCL9/VAMP5/USP19/ATF3/MEF2D/MYL6/LEF1/PPP3CA/MAPK11/EEF2/S1PR1/ASB2/SRF/CALR/CSRP1/HEG1/NPRL3/IGSF8
GOBP_REGULATION_OF_MYELOID_LEUKOCYTE_DIFFERENTIATION	GOBP_REGULATION_OF_MYELOID_LEUKOCYTE_DIFFERENTIATION	105	0.564409	1.79362	1.33327e-05	0.00203864	0.001764	2437	tags=34%, list=15%, signal=29%	CEBPB/FOS/CD101/GPR137B/TYROBP/TGFB1/TESC/JUN/TNF/NME1/RARA/GPR68/CDK6/LIF/CTNNBIP1/CCL3/IL23A/RASSF2/TOB2/IRF7/IL23R/HAX1/ATP6AP1/CD74/TFE3/ZFP36L1/LEF1/NME2/HCLS1/GPR137/TCTA/GNAS/MAFB/PIK3R1/RUNX1/IL20
GOBP_AMINOGLYCAN_BIOSYNTHETIC_PROCESS	GOBP_AMINOGLYCAN_BIOSYNTHETIC_PROCESS	104	0.565533	1.7938	1.43298e-05	0.00212935	0.00184249	3405	tags=27%, list=21%, signal=22%	CHST11/B3GNT9/B3GALT6/NFKB1/TGFB1/B3GAT3/CHST2/B4GALT5/CHPF/CHST14/ST3GAL2/HS6ST1/B4GALT1/ST3GAL1/CHPF2/IL1B/NDST2/VCAN/XYLT1/ABCC5/B4GALT7/CHSY1/XYLT2/UGDH/UST/CHST12/ST3GAL4/EXT1
GOBP_DIVALENT_INORGANIC_CATION_HOMEOSTASIS	GOBP_DIVALENT_INORGANIC_CATION_HOMEOSTASIS	421	0.428399	1.51829	1.45891e-05	0.00212935	0.00184249	3551	tags=25%, list=22%, signal=20%	S1PR4/GNA15/ATP13A2/S100A9/CCR9/GALR2/KCTD17/ATP2A3/CXCR5/AP3D1/CCR6/C5AR1/TMEM203/PTGER4/BCL2/P2RX5/DIAPH1/PDZD8/ANXA6/BAX/CCR7/CXCR4/S100A8/CCR4/DDIT3/SMAD3/CD55/MT1H/CALM3/LPAR2/CCR5/FASLG/CCL3/NMB/CDK5/CD38/CORO1A/MT1G/CCR10/CD52/TMC8/CXCR6/CHD7/PRKCB/SLC25A23/F2R/PROK2/SLC39A4/C19orf12/LIME1/FIS1/MCOLN1/BCAP31/PDE4D/TCIRG1/SV2A/STOML2/GPR35/CLN3/S1PR1/GNB1/PACS2/GOT1/SPPL3/TRIM24/CALR/FPR1/O…
GOBP_GLIOGENESIS	GOBP_GLIOGENESIS	245	0.473049	1.6188	1.56012e-05	0.00222647	0.00192652	3309	tags=30%, list=20%, signal=24%	SUN2/MAP2K1/S100A9/TGFB1/C5AR1/TNF/B4GALT5/MAPK3/CLU/MBOAT7/TSPAN2/NAB1/MMP24/CDK6/LTA/LIF/CXCR4/S100A8/TPPP/GRN/HDAC10/PICK1/NDRG1/CCL3/TSPO/CDK5/AKT1/EPHA4/CLCF1/TNFRSF1B/ABCA2/ZMIZ1/NR1D1/IL1B/SKI/GSN/SIRT2/NCSTN/CSK/AKT2/DAG1/LEF1/WDR1/EIF2B5/METRN/EEF2/CNTNAP1/NSUN5/ANXA1/MIR221/RELA/HES1/LDLR/E2F1/CDK5R1/EIF2B4/APP/MAPK1/HDAC1/ABL1/EIF2B2/IDH2/PRDM8/EIF2B3/GSTP1/ERCC2/SPINT1/ASCL2/NOTCH1/AR…
GOBP_CARBOHYDRATE_BIOSYNTHETIC_PROCESS	GOBP_CARBOHYDRATE_BIOSYNTHETIC_PROCESS	192	0.494927	1.661	1.61167e-05	0.00225003	0.00194691	1738	tags=22%, list=11%, signal=20%	CHST11/SIK1/B3GNT9/SESN2/KAT2A/PGP/PDXP/NFKB1/TGFB1/SIRT7/B4GALT5/FAM3C/PPP1R3D/SLC25A1/ISYNA1/CLK2/GYS1/CHST14/IMPA2/SLC25A11/PPP1CA/G6PC3/ST3GAL2/B4GALT1/PASK/TALDO1/PPP1R3F/AKT1/TPI1/G6PD/NR1D1/ENO1/FAM3A/PGD/AKR1B1/PGAM2/AKR1A1/SLC25A10/ATF3/AKT2/NDST2/DGKQ
GOBP_MONONUCLEAR_CELL_MIGRATION	GOBP_MONONUCLEAR_CELL_MIGRATION	158	0.517588	1.70883	1.78888e-05	0.00244429	0.002115	3435	tags=36%, list=21%, signal=29%	TBX21/S100A12/DUSP1/XCL2/TMEM102/CRK/CCR6/C5AR1/TNF/STK39/MAPK3/PYCARD/CCR7/ITGB7/CXCR4/CCL20/ADAM8/IL6R/RIPK3/SPN/FUT7/CCR5/CCL3/STK10/THBS1/PIK3CD/AKT1/MYO1G/CKLF/LGALS3/ALOX5/CXCL16/AIF1/S1PR1/CALR/ANXA1/C3AR1/ZAP70/IL27RA/CXCL10/APP/MAPK1/RPS19/LGALS9/GAS6/SLC12A2/ICAM1/CXCR3/CH25H/TNFRSF14/FADD/CD99L2/LYN/CCR2/ITGA4/EXT1/CCL5
GOBP_CONNECTIVE_TISSUE_DEVELOPMENT	GOBP_CONNECTIVE_TISSUE_DEVELOPMENT	199	0.487125	1.63749	2.17923e-05	0.00291563	0.00252284	3797	tags=26%, list=23%, signal=20%	CHST11/KAT2A/CRIP1/SMAD7/TGFB1/RARG/RORC/THBS3/XBP1/RUNX3/THRA/MAPK3/TGFBI/ANXA6/MAPK14/SMAD1/SMAD3/IL6R/LTBP3/WNT7A/TGFBR2/HYAL3/MEF2D/GLG1/CHADL/CDK4/UBB/SRF/GNAS/TYMS/DYRK1B/RUNX1/SLC39A13/PGRMC2/PPARD/HYAL2/RUNX2/ARRDC3/CHSY1/SNAI1/EGR1/NOTCH1/EXT1/EDN1/IL17F/PKD1/MBOAT2/WNT7B/PDGFB/MIR21/TIMP1
GOBP_MYELOID_LEUKOCYTE_DIFFERENTIATION	GOBP_MYELOID_LEUKOCYTE_DIFFERENTIATION	186	0.498996	1.67446	2.35135e-05	0.00308171	0.00266655	2437	tags=28%, list=15%, signal=25%	CEBPB/FOS/CD101/JUNB/GPR137B/TYROBP/TGFB1/TESC/JUN/TNF/NME1/RARA/TSPAN2/MAPK14/CD81/GPR68/CDK6/CCR7/LIF/CTNNBIP1/ANXA2/RELB/MMP9/CCL3/SPI1/SBNO2/PIK3CD/IL23A/MT1G/RASSF2/TOB2/TGFBR2/IRF7/IL23R/HAX1/ATP6AP1/CD74/TFE3/ZFP36L1/LEF1/TCIRG1/CEBPE/NME2/HCLS1/GPR137/TCTA/GAB2/GNAS/GAB3/MAFB/PIK3R1/RUNX1/IL20
GOMF_MITOGEN_ACTIVATED_PROTEIN_KINASE_BINDING	GOMF_MITOGEN_ACTIVATED_PROTEIN_KINASE_BINDING	32	0.747195	1.94822	2.51701e-05	0.00323285	0.00279733	2611	tags=59%, list=16%, signal=50%	DUSP5/DUSP2/DUSP1/MAPK7/ARRB2/MAPK14/PRMT1/TNIP1/GCH1/ACE/DUSP16/TAB1/DUSP6/MAPKAPK3/MAPKAPK2/DUSP4/NFATC1/PTPRJ/ABL1
GOBP_ERK1_AND_ERK2_CASCADE	GOBP_ERK1_AND_ERK2_CASCADE	257	0.461088	1.58697	2.62448e-05	0.00328691	0.00284411	3290	tags=26%, list=20%, signal=22%	MAP2K1/MIR27A/DUSP1/PRKD2/XCL2/TGFB1/HRAS/MAP2K2/C5AR1/TNF/PTGER4/ZFP36L2/ARRB2/MAPK3/GNAI2/TNIP1/RGS14/PYCARD/RRAS/CCR7/LIF/CCL20/PRKCZ/TBC1D10C/SIRT3/IL26/CTSH/PIN1/CCL3/MAP2K7/DUSP3/F2R/ABCA7/DUSP6/RAPGEF1/IL1B/CSK/ATP6AP1/CD74/ATF3/TRAF7/ZFP36L1/MIR27B/NLRP6/DUSP4/GLIPR2/EMILIN1/VRK3/MIR221/TPBG/EZR/APP/MAPK1/FAM83D/PHB2/ABL1/SLC9A3R1/PTPN6/GSTP1/LGALS9/GAS6/ICAM1/NQO2/NOD2/NOTCH1/CD4/NOD1/LYN
GOBP_REGULATION_OF_BINDING	GOBP_REGULATION_OF_BINDING	322	0.444528	1.55141	2.66147e-05	0.00328691	0.00284411	2629	tags=27%, list=16%, signal=23%	CDKN1A/BCL3/STUB1/MIR27A/MEN1/TICAM1/RFNG/HMGB2/TGFB1/PHLDA2/ATP2A3/SMARCD3/CRK/ZNF593/JUN/PLAUR/DNAJB2/MEPCE/TRIM28/CPNE1/RUVBL2/NFKBIA/NME1/RARA/ARRB2/MAPK3/CDK9/CDT1/RAMP1/BAX/EIF4A3/LIF/PBXIP1/DDIT3/ACE/PLXND1/SMAD3/ZNF304/TAF10/DVL1/CTNNBIP1/CALM3/PPP1CA/ANXA2/ADD1/MMP9/PIN1/PEX14/ADRB2/PCBD1/EDF1/CDK5/PRKCD/AKT1/EPHA4/TMC8/MED25/SKI/SIRT2/MARK3/ZBTB7A/S100A10/ACTB/BAMBI/LEF1/PPP3CA/TMSB4X/M…
GOBP_NEGATIVE_REGULATION_OF_PROTEIN_MODIFICATION_PROCESS	GOBP_NEGATIVE_REGULATION_OF_PROTEIN_MODIFICATION_PROCESS	495	0.408784	1.45765	2.78364e-05	0.00337293	0.00291854	2919	tags=26%, list=18%, signal=22%	CDKN1A/DUSP5/SOCS1/DUSP2/SOCS3/DDIT4/FKBP8/DUSP1/PRR7/MEN1/GADD45A/PPP1R15A/TNFAIP3/SMAD7/TGFB1/CHMP6/MYADM/TESC/SIRT7/TNF/BOD1/SNTA1/PPP1R35/ARRB2/SEMA4D/GNAI2/BAX/SH2B3/ZC3H12A/MGAT5/RGS14/PPP1R9B/ZFYVE28/PYCARD/TRIM44/ISG15/PARP10/SH3BP5/PARD6A/VPS25/PPP1R14B/PRKCZ/TPPP/SH3BP5L/NCK2/CTBP1/PBK/PNKP/DVL1/CDKN2D/CALM3/CCNB1/DUSP16/AKT1S1/DUSP22/TSPO/CDK5/SPI1/PKN1/PRKCD/RASSF2/AKT1/MLLT1/HSPA1B/D…
GOBP_RESPONSE_TO_INORGANIC_SUBSTANCE	GOBP_RESPONSE_TO_INORGANIC_SUBSTANCE	476	0.414018	1.47505	2.97403e-05	0.0035369	0.00306041	3487	tags=28%, list=21%, signal=23%	KLF2/FOS/DUSP1/ATP13A2/SIPA1/TNFAIP3/CRIP1/JUNB/NR4A3/UCP2/CRK/MAPK7/JUN/DNM2/JUND/BSG/GDI1/CPNE1/RHOB/FOSB/BCL2/MAPK3/ADA/RASGRP2/ZC3H12A/STK25/EIF4A3/CCR7/STK24/CD14/NUDT1/GCH1/S100A8/RIPK3/AQP3/MT1H/CALM3/PPP1CA/CCNB1/ADD1/MMP9/CPNE2/NDRG1/GPX1/MIEN1/TSPO/MAP1LC3A/TNNC1/THBS1/PRKCD/PRDX2/MT1G/KHK/AKT1/SIGMAR1/KDM6B/G6PD/PINK1/SLC25A23/NFE2L2/AKR1B1/LONP1/CCS/EGLN1/PGAM2/UCP3/GSN/NCSTN/CPNE7/BA…
GOBP_GLIAL_CELL_DEVELOPMENT	GOBP_GLIAL_CELL_DEVELOPMENT	97	0.566236	1.78216	3.08017e-05	0.00359652	0.00311201	3290	tags=38%, list=20%, signal=31%	S100A9/C5AR1/TNF/B4GALT5/CLU/TSPAN2/CDK6/S100A8/TPPP/GRN/HDAC10/PICK1/NDRG1/CDK5/AKT1/ABCA2/NR1D1/SKI/GSN/SIRT2/NCSTN/AKT2/DAG1/EIF2B5/CNTNAP1/NSUN5/LDLR/EIF2B4/APP/EIF2B2/PRDM8/EIF2B3/GSTP1/ERCC2/ARHGEF10/C1QA/LYN
GOBP_OSTEOCLAST_DIFFERENTIATION	GOBP_OSTEOCLAST_DIFFERENTIATION	84	0.58285	1.79438	3.51714e-05	0.00403341	0.00349004	2437	tags=31%, list=15%, signal=27%	CEBPB/FOS/JUNB/GPR137B/TYROBP/TNF/MAPK14/CD81/GPR68/ANXA2/CCL3/SBNO2/IL23A/RASSF2/TOB2/IL23R/ATP6AP1/TFE3/TCIRG1/GPR137/TCTA/GAB2/GNAS/MAFB/PIK3R1/IL20
GOMF_LIGAND_ACTIVATED_TRANSCRIPTION_FACTOR_ACTIVITY	GOMF_LIGAND_ACTIVATED_TRANSCRIPTION_FACTOR_ACTIVITY	45	0.683769	1.90172	3.79534e-05	0.00427609	0.00370002	1329	tags=24%, list=8%, signal=23%	NR4A2/SREBF1/NR4A1/NR4A3/RARG/RORC/RARA/THRA/RXRB/ESRRA/NR1D1
GOBP_CELLULAR_RESPONSE_TO_MOLECULE_OF_BACTERIAL_ORIGIN	GOBP_CELLULAR_RESPONSE_TO_MOLECULE_OF_BACTERIAL_ORIGIN	183	0.494673	1.65475	3.93741e-05	0.00435966	0.00377233	3435	tags=32%, list=21%, signal=26%	CEBPB/ZFP36/TNFAIP3/TICAM1/NFKB1/HMGB2/TGFB1/GFI1/PDE4B/TNF/NFKBIA/XBP1/MAPK3/NLRP3/MAPK14/ZC3H12A/PYCARD/CD14/NFKBIL1/IRAK1/IRF3/CD55/CCR5/CCL3/TSPO/SBNO2/CD68/PRDX2/AKT1/TNFRSF1B/NR1D1/IL1B/SIRT2/TNIP2/CEBPE/CDK4/IL10/RELA/HSF1/CXCL10/TBXA2R/PPARD/MAPK1/ABL1/GIT1/GSTP1/SIGIRR/NFKBIB/CARD17/ICAM1/NOD2/TNIP3/PPBP/LITAF/MYD88/LYN/ABCC2/CD6/CCL5
GOCC_CELL_SUBSTRATE_JUNCTION	GOCC_CELL_SUBSTRATE_JUNCTION	400	0.420844	1.48949	4.28712e-05	0.00466642	0.00403777	3998	tags=36%, list=24%, signal=28%	GNB2/RPS2/MAP2K1/PTPRA/MAP2K2/DNM2/PLAUR/BSG/ATP6V0C/ARMC5/RHOB/PIP5K1C/SLC4A2/KLF11/MAPK3/ARPC1B/TLN1/ANXA6/CD81/SCARF2/RRAS/AHNAK/ITGB7/PLEC/RAC2/CFL1/RRAS2/INPP5E/FLOT2/CAPN1/PFN1/FLNA/RHOG/ADD1/HYOU1/ILK/RPS5/PPFIA1/HSPA1B/ANXA5/SLA/LIMS2/TLE2/SORBS3/GSN/NCSTN/PROCR/HSPB1/SNTB1/PPIA/ACTB/CD151/DAG1/PARVG/RPS9/IL16/UBOX5/ACTG1/TRIOBP/CNN2/PACSIN2/RPL8/FERMT3/RPS4X/CALR/CASK/CORO1B/MAP4K4/PXN/C…
GOBP_STRESS_ACTIVATED_PROTEIN_KINASE_SIGNALING_CASCADE	GOBP_STRESS_ACTIVATED_PROTEIN_KINASE_SIGNALING_CASCADE	254	0.458156	1.57771	4.44854e-05	0.00476142	0.00411997	3380	tags=34%, list=20%, signal=27%	ZFP36/GADD45G/MAP2K1/DUSP1/GADD45B/MEN1/PER1/GADD45A/NFKB1/HRAS/MAP2K2/MAP3K8/TNF/PTGER4/TRAF4/MAPK3/MAPK14/PRMT1/ZC3H12A/STK25/PYCARD/CCR7/RELL2/SEMA4C/IRAK1/TNIK/MDFIC/PBK/IL26/CCDC88C/DBNL/DUSP22/MAP2K7/SPI1/WNT7A/PKN1/RASSF2/MAP2K4/AKT1/CD27/DUSP3/PINK1/TAB1/RAPGEF1/IL1B/AKR1B1/MAP2K3/PPIA/ZFP36L1/MAP4K2/IKBKG/TNIP2/TRAF1/MAP3K4/MINK1/MAPK11/MAPKAPK2/MAP4K1/DAXX/MAP3K3/UBB/SH2D3A/MAP4K4/CCM2/…
GOBP_MUCOPOLYSACCHARIDE_METABOLIC_PROCESS	GOBP_MUCOPOLYSACCHARIDE_METABOLIC_PROCESS	107	0.552305	1.75753	4.676e-05	0.00492283	0.00425964	3496	tags=30%, list=21%, signal=24%	CHST11/B3GALT6/NFKB1/TGFB1/CHST2/B4GALT5/CHPF/CHST14/ST3GAL2/B4GALT1/AKT1/ST3GAL1/CHPF2/IL1B/PIM1/HYAL3/NDST2/ARSB/VCAN/XYLT1/HYAL2/ABCC5/CHSY1/XYLT2/UGDH/GLB1/SPOCK2/UST/CHST12/ST3GAL4/EXT1/GALNS
GOBP_CELL_SUBSTRATE_ADHESION	GOBP_CELL_SUBSTRATE_ADHESION	322	0.440082	1.53589	4.86016e-05	0.00503418	0.00435599	2992	tags=23%, list=18%, signal=19%	LYPD3/PRKX/PTPRA/MYADM/CRK/ATRN/DNM2/MEGF9/THBS3/LDB1/BCL2/WNT1/PREX1/RRAS/CDK6/CCR7/ITGB7/RELL2/RAC2/PRKCZ/LGALS1/SMAD3/FLNA/BCL6/UNC13D/DUSP22/ILK/CDK5/THBS1/FMN1/CORO1A/PPFIA1/DUSP3/LIMS2/MYO1G/SORBS3/BCL2L11/BCR/SKAP1/WHAMM/S100A10/DAG1/PARVG/CD3E/MINK1/ACTG1/RCC2/ID1/TRIOBP/TESK1/SRF/FERMT3/CALR/CASK/EMILIN1/MAP4K4/PXN/FBLN5/ZYX/PIK3R1/PPM1F/PPARD/NTN4/CD63/PTPRJ/ARL2/ABL1/BCAS3/ACTN4/TBCD/R…
GOBP_CELLULAR_RESPONSE_TO_CHEMICAL_STRESS	GOBP_CELLULAR_RESPONSE_TO_CHEMICAL_STRESS	309	0.44297	1.53748	5.10466e-05	0.00520351	0.0045025	2742	tags=29%, list=17%, signal=25%	NR4A2/KLF2/CYBA/FOS/ATP13A2/SESN2/MAPKAP1/TNFAIP3/NR4A3/CRK/MAPK7/PYCR2/JUN/DNM2/RHOB/STK39/BCL2/MAPK3/ZC3H12A/WNT1/STK25/STK24/NUDT2/GCH1/DDIT3/TP53/ROMO1/RIPK3/HTRA2/ABCD1/RELB/MMP9/GPX1/TSPO/MAP1LC3A/PRKCD/PRDX2/AKT1/HSPA1B/SIGMAR1/KDM6B/G6PD/KEAP1/PINK1/FOXO3/SLC25A23/NFE2L2/AKR1B1/LONP1/CCS/SIRT2/ALOX5/HSPB1/PRR5L/CAMKK2/PPIA/ZFP36L1/AIF1/CBX8/CLN3/ZNF580/PRDX5/NME2/TMEM161A/ENDOG/GPX7/PPP5C…
GOBP_RESPONSE_TO_MOLECULE_OF_BACTERIAL_ORIGIN	GOBP_RESPONSE_TO_MOLECULE_OF_BACTERIAL_ORIGIN	304	0.44225	1.53371	5.29611e-05	0.00531432	0.00459838	2800	tags=23%, list=17%, signal=19%	CEBPB/ZFP36/FOS/S100A9/TNFAIP3/TICAM1/NFKB2/NFKB1/HMGB2/TGFB1/GFI1/PDE4B/JUN/JUND/C5AR1/TNF/PTGER4/NFKBIA/XBP1/MAPK3/NLRP3/MAPK14/ZC3H12A/PYCARD/CCR7/LTA/CD14/NFKBIL1/GCH1/S100A8/IRAK1/IRF3/CD55/CCR5/FASLG/OTUD5/CCL3/TSPO/SBNO2/CD68/PRDX2/AKT1/TNFRSF1B/F2R/IRF5/IL23R/NR1D1/IL1B/SIRT2/GJB6/MAPKAPK3/TNIP2/MAPKAPK2/CEBPE/CDK4/GGT1/IL10/RELA/HSF1/CXCL10/TBXA2R/PPARD/MAPK1/ABL1/GIT1/GSTP1/LGALS9/SIGIR…
GOBP_LEUKOCYTE_CHEMOTAXIS	GOBP_LEUKOCYTE_CHEMOTAXIS	189	0.487003	1.63291	5.40596e-05	0.00534109	0.00462155	3435	tags=34%, list=21%, signal=27%	S100A12/DUSP1/S100A9/XCL2/TMEM102/CXCR5/PDE4B/CCR6/C5AR1/BSG/PIP5K1C/STK39/MAPK3/PREX1/CCR7/CXCR4/CCL20/RAC2/S100A8/GPSM3/ADAM8/IL6R/CCR5/CCL3/FCER1G/THBS1/PIK3CD/CORO1A/IL23A/CKLF/LGALS3/IL17RC/ALOX5/CD74/PPIA/CXCL16/AIF1/IL16/ZNF580/S1PR1/CALR/IL10/ANXA1/VAV1/C3AR1/VEGFB/CXCL10/MAPK1/RPS19/LGALS9/MPP1/CAMK1D/GAS6/SLC12A2/CXCR3/NOD2/CH25H/PPBP/RIN3/LYN/CCR2/RAC1/EDN1/CCL5
GOBP_CD4_POSITIVE_ALPHA_BETA_T_CELL_DIFFERENTIATION	GOBP_CD4_POSITIVE_ALPHA_BETA_T_CELL_DIFFERENTIATION	76	0.591364	1.78453	5.51033e-05	0.00536172	0.0046394	2544	tags=39%, list=15%, signal=34%	BCL3/SOCS1/TBX21/SMAD7/PTGER4/RORC/RUNX3/RARA/NLRP3/ZC3H12A/CD83/PRKCZ/IL6R/SPN/FUT7/BCL6/RELB/IL23A/TOX/IL23R/SLAMF6/LEF1/CBFB/NFKBID/IL12RB1/ANXA1/RUNX1/IL4R/ZBTB7B/NFKBIZ
GOBP_REGULATION_OF_LEUKOCYTE_MIGRATION	GOBP_REGULATION_OF_LEUKOCYTE_MIGRATION	181	0.483791	1.61693	5.79027e-05	0.00549187	0.00475202	3435	tags=35%, list=21%, signal=28%	DUSP1/XCL2/TMEM102/CRK/TNFRSF18/CCR6/C5AR1/TNF/PTGER4/STK39/MAPK3/ADA/CD81/PYCARD/CCR7/CCL20/RAC2/GPSM3/ADAM8/IL6R/RIPK3/SPN/FUT7/RHOG/CCL3/STK10/THBS1/FUT4/IL23A/AKT1/LGALS3/CD74/RHOH/AIF1/ZNF580/CALR/EMILIN1/ANXA1/C3AR1/VEGFB/IL27RA/CXCL10/APP/MAPK1/LGALS9/MPP1/CAMK1D/GAS6/ICAM1/CXCR3/NOD2/TNFRSF14/FADD/MYD88/CD99L2/RIN3/ST3GAL4/LYN/CCR2/RAC1/ITGA4/EDN1/CCL5
GOBP_MAINTENANCE_OF_LOCATION	GOBP_MAINTENANCE_OF_LOCATION	286	0.44046	1.52678	5.81512e-05	0.00549187	0.00475202	3310	tags=28%, list=20%, signal=23%	BCL3/NFKBIE/CHCHD10/SUN2/SREBF1/S100A9/FAF1/NFKB1/AP3D1/TNF/NFKBIA/DIAPH1/ANXA6/BAX/ZC3H12A/STAT5B/CCR7/S100A8/DDIT3/CALM3/FLNA/IKBKE/CCR5/HILPDA/FASLG/CCL3/TSPO/CDK5/CORO1A/AKT1/KEAP1/DGAT1/PINK1/CHD7/SLC25A23/F2R/IL1B/GSN/FTH1/ABCG1/LIME1/SRGN/MCOLN1/TMSB4X/PDE4D/TMSB10/EHD1/DAND5/NR1H2/GET4/CCDC22/CALR/IL10/GAA/TXN/SQLE/LCK/CXCL10/PPARD/TWF2/ARL2/ABL1/PNPLA2/PTPN6/NOL3/NFKBIB/FTL/SREBF2/ASXL2/…
GOBP_NEGATIVE_REGULATION_OF_NOTCH_SIGNALING_PATHWAY	GOBP_NEGATIVE_REGULATION_OF_NOTCH_SIGNALING_PATHWAY	29	0.740336	1.89534	6.1564e-05	0.00554168	0.00479511	1543	tags=31%, list=9%, signal=28%	LFNG/CBFA2T2/NFKBIA/TSPAN15/SLC35C1/BCL6/AKT1/ARRDC1/ZBTB7A
GOBP_POSITIVE_REGULATION_OF_REACTIVE_OXYGEN_SPECIES_METABOLIC_PROCESS	GOBP_POSITIVE_REGULATION_OF_REACTIVE_OXYGEN_SPECIES_METABOLIC_PROCESS	88	0.576723	1.78152	6.18893e-05	0.00554168	0.00479511	1391	tags=27%, list=8%, signal=25%	CDKN1A/KLF2/CYBA/GADD45A/TICAM1/TYROBP/TGFB1/DNM2/TNF/CLU/GNAI2/MAPK14/ZC3H12A/TP53/ROMO1/SMAD3/RIPK3/TSPO/THBS1/PRKCD/AKT1/TGFBR2/NFE2L2/IL1B
GOMF_RECEPTOR_REGULATOR_ACTIVITY	GOMF_RECEPTOR_REGULATOR_ACTIVITY	406	0.423834	1.50099	6.21303e-05	0.00554168	0.00479511	2629	tags=16%, list=16%, signal=13%	OSM/XCL2/NENF/TYMP/HMGB2/TGFB1/CMTM3/TNFSF12/IL32/TNF/FAM3C/CMTM8/AREG/TNFSF14/LTB/IL22/SEMA4B/SEMA4D/METRNL/WNT1/FLT3LG/CMTM7/POMC/FST/LTA/LIF/DUT/WNT10A/CCL20/SEMA4C/HDGF/IL26/GRN/FASLG/CCL3/NMB/CDK5/WNT7A/IL23A/CLCF1/CKLF/IL1B/LGALS3/LY6E/GMFG/CXCL16/GFER/IL16/DGKQ/METRN/HBEGF/DAND5/IL10/ADM2/SCGB3A1/VEGFB/IL20/RABEP2/CXCL10/INSL3/APP/NAMPT/GREM2
GOBP_REGULATION_OF_DNA_BINDING_TRANSCRIPTION_FACTOR_ACTIVITY	GOBP_REGULATION_OF_DNA_BINDING_TRANSCRIPTION_FACTOR_ACTIVITY	384	0.425046	1.49631	6.04337e-05	0.00554168	0.00479511	3257	tags=30%, list=20%, signal=24%	NFKBIE/SIK1/BHLHE40/FOS/S100A12/MIR27A/TNFRSF4/MEN1/S100A9/RNF31/TNFAIP3/TICAM1/NFKB2/FAF1/PRKD2/TFDP1/NFKB1/SMAD7/GFI1/RPS6KA4/JUN/TNF/NFKBIA/ARRB2/MAPK3/CLU/LRRC14/SGK1/NLRP3/MAPK14/TRADD/ZC3H12A/WNT1/BEX1/PYCARD/PARP10/PRKCQ/NFKBIL1/PRKCZ/S100A8/IRAK1/COMMD1/ADAM8/DDIT3/SMAD3/RIPK3/FLOT2/CTNNBIP1/FLNA/PEX14/PPP2R5B/PRDX2/AKT1/HSPA1B/KEAP1/PINK1/PRKCB/TRIM8/TAB1/CARD11/IL1B/EGLN1/PIM1/RNF25/ZBT…
GOBP_POSITIVE_REGULATION_OF_CELL_SUBSTRATE_ADHESION	GOBP_POSITIVE_REGULATION_OF_CELL_SUBSTRATE_ADHESION	104	0.543213	1.72301	6.35689e-05	0.00559232	0.00483893	2992	tags=31%, list=18%, signal=25%	MYADM/CRK/DNM2/PREX1/RRAS/CDK6/CCR7/RELL2/PRKCZ/SMAD3/FLNA/UNC13D/ILK/FMN1/LIMS2/SKAP1/S100A10/DAG1/CD3E/TRIOBP/TESK1/CALR/EMILIN1/MAP4K4/PPM1F/PTPRJ/ARL2/ABL1/RSU1/P4HB/SPOCK2/ITGA6
GOBP_POSITIVE_REGULATION_OF_CYTOKINE_PRODUCTION	GOBP_POSITIVE_REGULATION_OF_CYTOKINE_PRODUCTION	388	0.423798	1.49438	6.50294e-05	0.00564349	0.00488321	3309	tags=31%, list=20%, signal=25%	BCL3/CEBPB/OSM/CYBA/SLC7A5/FURIN/TICAM1/NFKB2/PRKD2/NR4A3/TYROBP/NFKB1/HMGB2/TGFB1/HRAS/CCDC88B/PDE4B/AGPAT2/POLR2L/C5AR1/TNF/PTGER4/XBP1/RARA/LTB/CLU/NLRP3/MAPK14/CD81/GSDMD/CD83/STAT5B/PYCARD/CCR7/LTA/CD14/PRKCQ/TMIGD2/PRKCZ/IRAK1/GPSM3/ADAM8/DDIT3/IRF3/SMAD3/IL6R/IL26/SPN/IL17RA/HILPDA/CCL3/FCER1G/THBS1/IL23A/HSPA1B/IRF7/F2R/IRF5/IL23R/AGPAT1/CARD11/IL1B/IL17RC/CD74/HSPB1/SLAMF6/POLR2E/CD3E/AI…
GOBP_NEGATIVE_REGULATION_OF_CELL_GROWTH	GOBP_NEGATIVE_REGULATION_OF_CELL_GROWTH	165	0.502294	1.66729	6.66283e-05	0.00570516	0.00493657	3370	tags=30%, list=20%, signal=24%	CDKN1A/SESN2/SIPA1/CTDP1/TGFB1/SERTAD3/DNAJB2/BTG1/BCL2/SEMA4B/PI16/SEMA4D/PPP1R9B/CCDC85B/SEMA4C/TP53/SMAD3/CDKN2D/STK11/BCL6/CDK5/HSPA1B/NDUFA13/G6PD/ENO1/NME6/PPP2R1A/SMARCA4/NDUFS3/SPHK2/ARHGAP4/BST2/EI24/FHL1/SCGB3A1/PPARD/PTPRJ/CDK5R1/MUL1/HYAL2/TRIM46/MIR199A1/SEMA4A/VGLL4/ST20/RGS2/PML/PAK1/PSRC1
GOBP_INTRINSIC_APOPTOTIC_SIGNALING_PATHWAY	GOBP_INTRINSIC_APOPTOTIC_SIGNALING_PATHWAY	256	0.451287	1.55304	6.9634e-05	0.00588407	0.00509138	3333	tags=36%, list=20%, signal=29%	CDKN1A/BCL3/CEBPB/DDIT4/S100A9/PPP1R15A/CRIP1/PLEKHF1/ATP2A3/SGPP1/HRAS/MAPK7/TNF/PLAUR/XBP1/TP53BP2/BCL2/CLU/BAX/STK25/CIDEB/PYCARD/STK24/S100A8/DDIT3/TP53/NCK2/SKIL/RIPK3/HTRA2/BAG6/CDKN2D/STK11/IKBKE/MMP9/HYOU1/GPX1/AEN/PRKCD/AKT1/NDUFA13/URI1/PINK1/TNFRSF1B/ENO1/NFE2L2/BCL2L11/CD74/HSPB1/SHISA5/PPIA/FIS1/BCAP31/MIR27B/PIAS4/NDUFS3/TMEM161A/UBB/ERP29/BBC3/NACC2/BCL2L1/SFPQ/RPS3/PIK3R1/LCK/FNIP…
GOBP_LYMPHOCYTE_MIGRATION	GOBP_LYMPHOCYTE_MIGRATION	94	0.556078	1.74472	7.41759e-05	0.0060781	0.00525927	3435	tags=41%, list=21%, signal=33%	TBX21/XCL2/TMEM102/CRK/CCR6/STK39/PYCARD/CCR7/ITGB7/CCL20/ADAM8/RIPK3/SPN/FUT7/CCL3/STK10/PIK3CD/AKT1/MYO1G/CKLF/CXCL16/AIF1/S1PR1/ZAP70/IL27RA/CXCL10/APP/GAS6/SLC12A2/ICAM1/CXCR3/CH25H/TNFRSF14/FADD/CD99L2/CCR2/ITGA4/EXT1/CCL5
GOBP_STRIATED_MUSCLE_CELL_DIFFERENTIATION	GOBP_STRIATED_MUSCLE_CELL_DIFFERENTIATION	222	0.462296	1.57142	7.40353e-05	0.0060781	0.00525927	3332	tags=22%, list=20%, signal=18%	SIK1/RBM38/KAT2A/CTDP1/TGFB1/ACVR1/XBP1/ARRB2/BCL2/PI16/MAPK14/CD81/TMEM119/MIR590/WNT1/CCNB1/PIN1/GPX1/MAP2K4/AKT1/KDM6B/G6PD/NFATC2/PLD3/CBY1/SKI/BCL9/PPP3CA/ADAM12/WDR1/EHD1/PLEKHO1/SRF/CALR/CSRP1/DYRK1B/SCGB3A1/IL4R/CXCL10/MYH9/TANC1/FLII/MIR199A1/MYH3/NOTCH1/RGS2/CD53/PAK1/MAMSTR
GOBP_RESPONSE_TO_BACTERIUM	GOBP_RESPONSE_TO_BACTERIUM	496	0.401414	1.43136	7.47695e-05	0.0060781	0.00525927	3243	tags=23%, list=20%, signal=19%	BCL3/CEBPB/ZFP36/CYBA/FOS/S100A12/S100A9/TNFAIP3/TICAM1/NFKB2/NFKB1/HMGB2/TGFB1/GFI1/PDE4B/JUN/JUND/RGS1/C5AR1/TNF/PTGER4/NFKBIA/XBP1/MAPK3/NLRP3/MAPK14/GSDMD/ZC3H12A/PYCARD/CCR7/ISG15/LTA/CD14/NFKBIL1/CCL20/GCH1/S100A8/IRAK1/CCR4/ROMO1/IRF3/IL6R/GRN/CD55/SPN/CCR5/FASLG/OTUD5/GPX1/CCL3/TSPO/FCER1G/SBNO2/CD68/PRKCD/IL23A/PRDX2/AKT1/CHD7/TNFRSF1B/F2R/IRF5/IL23R/NR1D1/IL1B/SIRT2/GJB6/PLA2G6/GSDMB/MA…
GOBP_RESPONSE_TO_OXIDATIVE_STRESS	GOBP_RESPONSE_TO_OXIDATIVE_STRESS	391	0.42007	1.48186	8.05703e-05	0.00646778	0.00559645	3494	tags=32%, list=21%, signal=26%	NR4A2/KLF2/CYBA/FOS/DUSP1/ATP13A2/SESN2/MAPKAP1/TNFAIP3/NR4A3/UCP2/CRK/ATRN/MAPK7/PYCR2/JUN/DNM2/RHOB/BCL2/MAPK3/PLK3/ADA/ZC3H12A/WNT1/STK25/RGS14/CCR7/STK24/NUDT1/NUDT2/GCH1/TP53/ROMO1/RIPK3/PNKP/HTRA2/ABCD1/NEIL1/MMP9/GPX1/MAP1LC3A/HMOX2/CD38/PRKCD/PRDX2/AKT1/HSPA1B/SIGMAR1/KDM6B/G6PD/KEAP1/PINK1/FOXO3/NDUFS8/NFE2L2/LONP1/CCS/EGLN1/TXN2/UCP3/SIRT2/ALOX5/C19orf12/HSPB1/PRR5L/CAMKK2/PPIA/MSRB2/AI…
GOBP_CHAPERONE_MEDIATED_AUTOPHAGY	GOBP_CHAPERONE_MEDIATED_AUTOPHAGY	16	0.81948	1.8486	8.29563e-05	0.00657711	0.00569105	935	tags=38%, list=6%, signal=35%	SNRNP70/STUB1/ATP13A2/PLK3/CLU/BAG3
GOBP_REGULATION_OF_MYOTUBE_DIFFERENTIATION	GOBP_REGULATION_OF_MYOTUBE_DIFFERENTIATION	30	0.737835	1.90043	8.56692e-05	0.00664877	0.00575306	532	tags=20%, list=3%, signal=19%	SIK1/RBM38/XBP1/BCL2/MAPK14/TMEM119
GOBP_REACTIVE_OXYGEN_SPECIES_METABOLIC_PROCESS	GOBP_REACTIVE_OXYGEN_SPECIES_METABOLIC_PROCESS	242	0.457506	1.56367	8.59309e-05	0.00664877	0.00575306	4028	tags=38%, list=24%, signal=29%	CDKN1A/KLF2/CYBA/DDIT4/SESN2/GADD45A/TICAM1/TYROBP/TGFB1/DNM2/TNF/SLC25A33/BCL2/CLU/GNAI2/MAPK14/MIR590/ZC3H12A/PREX1/RAC2/GCH1/TP53/ROMO1/SMAD3/SIRT3/RIPK3/ABCD1/GPX1/TSPO/THBS1/PRKCD/PRDX2/AKT1/STK17A/NDUFA13/TGFBR2/G6PD/PINK1/CTNS/NFE2L2/IL1B/CCS/SIRT2/GCHFR/ALOX5/CYB5R3/MIR27B/EIF6/NDUFS3/PRDX5/SPHK2/DYNLL1/KHSRP/IL10/FBLN5/PRDX6/VAV1/PRDX1/HDAC6/ZNF205/DHFR/ATP2B4/CAT/GSTP1/TUSC2/MIR199A1/DD…
GOBP_POSITIVE_REGULATION_OF_LEUKOCYTE_PROLIFERATION	GOBP_POSITIVE_REGULATION_OF_LEUKOCYTE_PROLIFERATION	134	0.514534	1.67695	8.77508e-05	0.00670876	0.00580497	3801	tags=43%, list=23%, signal=33%	CDKN1A/TNFRSF4/TICAM1/CCDC88B/BCL2/MAPK3/SLC7A1/ADA/CD81/FLT3LG/STAT5B/PYCARD/PRKCQ/TMIGD2/NCK2/RASAL3/CD55/BCL6/CD38/CORO1A/IL23A/TGFBR2/NFATC2/CLCF1/IL23R/CARD11/IL1B/CD74/CD3E/AIF1/IL5RA/IL12RB1/ANXA1/BST2/ZAP70/RPS3/HES1/TNFRSF13C/IL27RA/DNAJA3/MAPK1/ZNF335/LGALS9/FADD/CD4/MYD88/PNP/LYN/CCR2/CD6/CCL5/CD40LG/GPR183/RIPK2/MIR21/HHLA2/SASH3
GOCC_SIDE_OF_MEMBRANE	GOCC_SIDE_OF_MEMBRANE	458	0.409933	1.45947	9.28184e-05	0.00701271	0.00606797	3662	tags=29%, list=22%, signal=23%	GNA15/PDCD1/SLC7A5/GNB2/TNFRSF4/GRAMD1A/RNF31/CCR9/CXCR5/MAP2K2/TNFRSF18/CCR6/RGS1/TNF/GNAI2/ADA/CD83/PPP1R9B/CCR7/ESYT1/CD14/CXCR4/CD69/CCR4/LAG3/ACE/S100A6/IL6R/RASAL3/HTRA2/SPN/CCR5/IL2RG/FASLG/RPS26/MIEN1/NUCB1/B4GALT1/FCER1G/THBS1/AKT1/CD27/CCR10/TGFBR2/G6PD/SLA/CXCR6/IL23R/LAMP1/ABCG1/CD74/ASPSCR1/LY6G5C/DAG1/TRAF1/PPP3CA/CD3E/MYZAP/BCAP31/SYAP1/IL5RA/S1PR1/GNB1/PTP4A1/OSBPL2/SPPL3/IL12RB1/…
GOBP_P38MAPK_CASCADE	GOBP_P38MAPK_CASCADE	43	0.6783	1.87384	9.46391e-05	0.00706712	0.00611506	1950	tags=42%, list=12%, signal=37%	ZFP36/GADD45G/DUSP1/GADD45B/PER1/GADD45A/MAPK14/PRMT1/ZC3H12A/RELL2/SPI1/IL1B/MAP2K3/ZFP36L1/MAP3K4/MINK1/MAPKAPK2/MAP3K3
GOBP_REGULATION_OF_CHEMOTAXIS	GOBP_REGULATION_OF_CHEMOTAXIS	191	0.476809	1.6	9.9087e-05	0.00731422	0.00632886	3435	tags=29%, list=21%, signal=23%	DUSP1/PRKD2/XCL2/TMEM102/TGFB1/CCR6/C5AR1/FGFR1/STK39/MAPK3/SEMA4B/SEMA4D/CCR7/CXCR4/RAC2/SEMA4C/GPSM3/CCR4/SMAD3/IL6R/CCL3/THBS1/IL23A/DUSP3/ZSWIM6/CD74/HSPB1/AIF1/IL16/TMSB4X/ZNF580/S1PR1/CALR/CORO1B/ZSWIM4/STX4/C3AR1/TPBG/VEGFB/CXCL10/PPM1F/MAPK1/GSTP1/LGALS9/MPP1/CAMK1D/SEMA4A/GAS6/NOD2/NOTCH1/RIN3/LYN/CCR2/RAC1/EDN1/CCL5
GOBP_CARTILAGE_DEVELOPMENT	GOBP_CARTILAGE_DEVELOPMENT	152	0.502571	1.65457	0.000102346	0.00744653	0.00644335	3797	tags=24%, list=23%, signal=19%	CHST11/KAT2A/SMAD7/TGFB1/RARG/THBS3/RUNX3/THRA/MAPK3/TGFBI/ANXA6/MAPK14/SMAD1/SMAD3/LTBP3/WNT7A/TGFBR2/HYAL3/MEF2D/GLG1/CHADL/SRF/GNAS/TYMS/RUNX1/HYAL2/RUNX2/CHSY1/SNAI1/EXT1/EDN1/IL17F/PKD1/MBOAT2/WNT7B/MIR21/TIMP1
GOBP_REGULATION_OF_REACTIVE_OXYGEN_SPECIES_METABOLIC_PROCESS	GOBP_REGULATION_OF_REACTIVE_OXYGEN_SPECIES_METABOLIC_PROCESS	167	0.4855	1.61428	0.000103199	0.00744653	0.00644335	3855	tags=41%, list=23%, signal=32%	CDKN1A/KLF2/CYBA/GADD45A/TICAM1/TYROBP/TGFB1/DNM2/TNF/SLC25A33/BCL2/CLU/GNAI2/MAPK14/MIR590/ZC3H12A/RAC2/GCH1/TP53/ROMO1/SMAD3/SIRT3/RIPK3/ABCD1/TSPO/THBS1/PRKCD/PRDX2/AKT1/STK17A/TGFBR2/G6PD/PINK1/CTNS/NFE2L2/IL1B/SIRT2/ALOX5/MIR27B/EIF6/SPHK2/DYNLL1/KHSRP/IL10/FBLN5/HDAC6/ZNF205/DHFR/ATP2B4/GSTP1/TUSC2/MIR199A1/DDAH2/ICAM1/NQO2/PARK7/RAC1/EDN1/CYP1B1/MPV17/ITGB2/RNF41/TRAP1/PTX3/PDGFB/MIR21/FYN…
GOBP_RESPONSE_TO_EXTRACELLULAR_STIMULUS	GOBP_RESPONSE_TO_EXTRACELLULAR_STIMULUS	408	0.407715	1.44283	0.000113161	0.00807467	0.00698687	3466	tags=29%, list=21%, signal=23%	CDKN1A/SIK1/NR4A2/ZFP36/FOS/SREBF1/SESN2/KAT2A/PSPH/SIPA1/NENF/UCP2/JUN/XBP1/BCL2/MAPK3/GNAI2/ADA/ZC3H12A/CIDEB/PPP1R9B/POMC/LTA/STK24/NUDT1/DDIT3/TP53/AQP3/CDKN2D/USF2/WDR59/PICK1/FOXO4/TSPO/ADRB2/MAP1LC3A/CD68/AKT1/TGFBR2/ARHGAP35/G6PD/ULK2/FOXO3/HMGCL/NFE2L2/TXN2/UCP3/GSN/SIRT2/PIM1/SLC39A4/EIF4EBP1/ATF3/WDR45/UPP1/CD3E/RRAGD/PRKAG1/EEF2/NR1H2/SRF/TRIM24/ARSB/TYMS/MBD3/NPRL3/RRAGB/RELA/DNMT3A/…
GOBP_CELL_GROWTH	GOBP_CELL_GROWTH	413	0.413375	1.4633	0.000117876	0.00831866	0.00719799	2642	tags=22%, list=16%, signal=19%	CDKN1A/CLSTN1/SESN2/OGFR/S100A9/SIPA1/CTDP1/SMAD7/TGFB1/SERTAD3/IGFBP4/DNM2/RARG/DNAJB2/GDI1/SLC25A33/CPNE1/BTG1/CISH/BCL2/SEMA4B/PI16/SGK1/SEMA4D/RASGRP2/PPP1R9B/CXCR4/CCDC85B/PRKCQ/SEMA4C/PRKCZ/S100A8/TP53/SMAD3/DDX49/DVL1/DBNL/CDKN2D/STK11/BCL6/PIN1/ATAD3A/CDK5/CD38/MAP2K4/AKT1/HSPA1B/NDUFA13/TGFBR2/G6PD/ULK2/TMC8/URI1/NIN/ENO1/NME6/LAMTOR1/BAP1/LAMTOR2/TMEM97/CXCL16/CLSTN3/PPP2R1A/SMARCA4/NDU…
GOBP_CHONDROCYTE_DIFFERENTIATION	GOBP_CHONDROCYTE_DIFFERENTIATION	87	0.556094	1.71616	0.000137615	0.00950286	0.00822266	1773	tags=17%, list=11%, signal=15%	CHST11/SMAD7/TGFB1/RARG/RUNX3/TGFBI/ANXA6/MAPK14/SMAD3/LTBP3/WNT7A/TGFBR2/MEF2D/GLG1/CHADL
GOBP_POSITIVE_REGULATION_OF_MYELOID_CELL_DIFFERENTIATION	GOBP_POSITIVE_REGULATION_OF_MYELOID_CELL_DIFFERENTIATION	92	0.549569	1.71522	0.000136584	0.00950286	0.00822266	2437	tags=36%, list=15%, signal=31%	FOS/CD101/TYROBP/HMGB2/TGFB1/TESC/JUN/TNF/MAPK14/PRMT1/GPR68/STAT5B/ISG15/LIF/FAM210B/RCOR1/ZNF16/CTNNBIP1/IL23A/HSPA1B/FOXO3/IL23R/HAX1/ATP6AP1/CD74/ZFP36L1/LEF1/ANKRD54/HCLS1/GNAS/MIR221/RUNX1/IL20
GOBP_POSITIVE_REGULATION_OF_B_CELL_ACTIVATION	GOBP_POSITIVE_REGULATION_OF_B_CELL_ACTIVATION	70	0.580179	1.73088	0.000143871	0.00982912	0.00850496	1666	tags=27%, list=10%, signal=25%	CDKN1A/TBX21/TNFRSF4/TICAM1/TGFB1/XBP1/BCL2/ADA/CD81/STAT5B/EXOSC6/BCL6/CD38/CD27/NFATC2/CLCF1/CARD11/CD74/TNIP2
GOBP_REGULATION_OF_LIPID_METABOLIC_PROCESS	GOBP_REGULATION_OF_LIPID_METABOLIC_PROCESS	346	0.424003	1.48756	0.000146304	0.00989012	0.00855774	3129	tags=25%, list=19%, signal=21%	SIK1/STUB1/MIR27A/SREBF1/NR4A3/LSR/NFKB1/TGFB1/SMARCD3/PANK2/DGKZ/LPCAT1/GFI1/CREBL2/G0S2/TNF/RORC/THRA/MBOAT7/CD81/STAT5B/MID1IP1/CCR7/LPGAT1/WDTC1/PMVK/SIRT3/CTDNEP1/ABCD1/TYSND1/TSPO/EDF1/PRKCD/AKT1/ACADVL/NCOR2/ABCA2/NR1D1/ABCA7/FAM3A/IL1B/NFYC/LAMTOR1/ABCG1/CD74/H6PD/SMPD2/ABHD6/TM7SF2/LACTB/AKT2/DGKQ/MIR27B/EIF6/STOML2/FABP3/CDK4/SPHK2/NR1H2/GLIPR1/FDPS/ATP1A1/ANXA1/CPT2/CARM1/MVD/PPP2R5A/S…
GOBP_LYMPHOCYTE_ACTIVATION_INVOLVED_IN_IMMUNE_RESPONSE	GOBP_LYMPHOCYTE_ACTIVATION_INVOLVED_IN_IMMUNE_RESPONSE	167	0.480194	1.59664	0.000151214	0.0101156	0.00875285	2611	tags=28%, list=16%, signal=23%	BCL3/TBX21/SMAD7/TGFB1/LFNG/CCR6/PTGER4/RORC/XBP1/RARA/NLRP3/ADA/CD81/ZC3H12A/PRKCZ/LGALS1/TP53/IL6R/EXOSC6/SPN/BCL6/UNC13D/RELB/FCER1G/CORO1A/IL23A/CLCF1/IL23R/ST3GAL1/LGALS3/LAMP1/CD74/SLAMF6/LEF1/NFKBID/IL12RB1/IL10/EOMES/ANXA1/ERCC1/FGL2/IL4R/IL27RA/ZBTB7B/NFKBIZ/ABL1
GOBP_ADENYLATE_CYCLASE_ACTIVATING_G_PROTEIN_COUPLED_RECEPTOR_SIGNALING_PATHWAY	GOBP_ADENYLATE_CYCLASE_ACTIVATING_G_PROTEIN_COUPLED_RECEPTOR_SIGNALING_PATHWAY	100	0.539551	1.70459	0.000166453	0.010454	0.00904564	2751	tags=22%, list=17%, signal=18%	S1PR4/GALR2/PDE4B/PTGER4/GNAI2/RAMP1/ADCY3/LPAR2/ADRB2/S1PR2/PDE4D/MC1R/S1PR1/NME2/GNB1/GNAS/ADM2/CXCL10/TBXA2R/ATP2B4/SLC9A3R1/ARRDC3
GOBP_POSITIVE_REGULATION_OF_CHEMOTAXIS	GOBP_POSITIVE_REGULATION_OF_CHEMOTAXIS	127	0.512647	1.65825	0.000162111	0.010454	0.00904564	3435	tags=32%, list=21%, signal=26%	PRKD2/XCL2/TMEM102/TGFB1/CCR6/C5AR1/FGFR1/STK39/MAPK3/CCR7/CXCR4/RAC2/GPSM3/CCR4/SMAD3/IL6R/CCL3/THBS1/IL23A/CD74/HSPB1/AIF1/IL16/TMSB4X/ZNF580/S1PR1/CALR/STX4/C3AR1/TPBG/VEGFB/CXCL10/PPM1F/MAPK1/LGALS9/CAMK1D/GAS6/CCR2/RAC1/EDN1/CCL5
GOBP_REGULATION_OF_PROTEIN_BINDING	GOBP_REGULATION_OF_PROTEIN_BINDING	180	0.477894	1.59555	0.000167667	0.010454	0.00904564	3840	tags=38%, list=23%, signal=30%	CDKN1A/STUB1/MEN1/TICAM1/RFNG/PHLDA2/ATP2A3/SMARCD3/CRK/DNAJB2/RUVBL2/ARRB2/MAPK3/RAMP1/BAX/ACE/PLXND1/DVL1/CTNNBIP1/PPP1CA/ANXA2/ADD1/MMP9/PIN1/PEX14/ADRB2/PCBD1/CDK5/PRKCD/AKT1/TMC8/MARK3/ACTB/BAMBI/LEF1/MIR27B/ID1/DTNBP1/SPPL3/IL10/SPON1/SNAPIN/HIP1R/HSF1/APP/SYMPK/ABL1/GREM2/LDLRAP1/MARK2/PLK2/PARK7/PLK1/AMFR/PRMT7/PLCL2/TRIB3/ITGA4/PRKACA/UBASH3B/PKD1/RALB/FLOT1/RAMP2/RIPK2/GTF2F1/PDGFB/LRPA…
GOBP_CELLULAR_RESPONSE_TO_BIOTIC_STIMULUS	GOBP_CELLULAR_RESPONSE_TO_BIOTIC_STIMULUS	205	0.465067	1.56869	0.000165322	0.010454	0.00904564	3435	tags=30%, list=21%, signal=24%	CEBPB/ZFP36/TNFAIP3/TICAM1/NFKB1/HMGB2/TGFB1/GFI1/PDE4B/TNF/NFKBIA/XBP1/MAPK3/NLRP3/MAPK14/ZC3H12A/PYCARD/CD14/NFKBIL1/IRAK1/DDIT3/TP53/IRF3/CD55/CCR5/CCL3/TSPO/SBNO2/CD68/PRDX2/AKT1/TNFRSF1B/NR1D1/IL1B/BCL2L11/SIRT2/TNIP2/CEBPE/CDK4/IL10/RELA/HSF1/CXCL10/TBXA2R/PPARD/MAPK1/ABL1/GIT1/GSTP1/SIGIRR/NFKBIB/CARD17/ICAM1/NOD2/TNIP3/PPBP/LITAF/MYD88/LYN/ABCC2/CD6/CCL5
GOBP_ADAPTIVE_IMMUNE_RESPONSE_BASED_ON_SOMATIC_RECOMBINATION_OF_IMMUNE_RECEPTORS_BUILT_FROM_IMMUNOGLOBULIN_SUPERFAMILY_DOMAINS	GOBP_ADAPTIVE_IMMUNE_RESPONSE_BASED_ON_SOMATIC_RECOMBINATION_OF_IMMUNE_RECEPTORS_BUILT_FROM_IMMUNOGLOBULIN_SUPERFAMILY_DOMAINS	227	0.454016	1.54588	0.000166158	0.010454	0.00904564	3309	tags=30%, list=20%, signal=24%	BCL3/TBX21/TNFAIP3/NFKB2/SMAD7/TGFB1/HRAS/CCR6/TNF/RORC/CLU/WAS/NLRP3/ADA/CD81/ZC3H12A/LTA/PRKCQ/PRKCZ/IL6R/RIPK3/CD55/EXOSC6/CTSH/SPN/FUT7/BCL6/UNC13D/RELB/FCER1G/PKN1/PRKCD/IL23A/CD27/IRF7/CLCF1/MYO1G/TNFRSF1B/IL23R/IL1B/CD74/SLAMF6/LEF1/TCIRG1/NFKBID/IL12RB1/IL10/ANXA1/IGLL5/ERCC1/IL4R/IL27RA/ZBTB7B/NFKBIZ/PTPN6/PRF1/TRAF2/SEMA4A/GZMM/ICAM1/NOD2/FADD/CD4/MYD88/C1QA/SLA2/CCR2
GOBP_RESPONSE_TO_TRANSFORMING_GROWTH_FACTOR_BETA	GOBP_RESPONSE_TO_TRANSFORMING_GROWTH_FACTOR_BETA	235	0.451947	1.54344	0.00016046	0.010454	0.00904564	2211	tags=21%, list=13%, signal=19%	CHST11/STUB1/FOS/MIR27A/MEN1/FURIN/SMAD7/TGFB1/GIPC1/CITED2/ACVR1/CRK/MAPK7/JUN/DNM2/ZFP36L2/RUNX3/ARRB2/SMAD1/WNT1/FAM89B/WNT10A/PARD6A/PRKCZ/TP53/SMAD3/SKIL/LTBP3/STK11/DUSP22/PIN1/THBS1/WNT7A/RASL11B/ARHGEF18/TGFBR2/TAB1/ZMIZ1/SKI/ZBTB7A/GLG1/ZFP36L1/BAMBI/ID1/DAND5/UBB/GOT1/EMILIN1/PXN/ZYX
GOBP_REGULATION_OF_INFLAMMATORY_RESPONSE	GOBP_REGULATION_OF_INFLAMMATORY_RESPONSE	301	0.426146	1.47742	0.000158544	0.010454	0.00904564	3325	tags=29%, list=20%, signal=24%	CEBPB/OSM/SOCS3/S100A12/S100A9/TNFAIP3/NFKB1/MAPK7/TNF/CST7/PTGER4/NFKBIA/STK39/NLRP3/ADA/METRNL/CD81/TRADD/MIR590/TNIP1/ABCC1/STAT5B/PYCARD/CCR7/LTA/S100A8/GPSM3/ADAM8/IRF3/SMAD3/PBK/GRN/BRD4/FUT7/BCL6/MMP9/GPX1/CCL3/TNFAIP8L2/SHARPIN/SBNO2/PRKCD/IL23A/IFI35/NLRX1/SPATA2/TNFRSF1B/NR1D1/IL1B/RHBDD3/ALOX5/BAP1/IL16/TMSB4X/GGT1/NLRP6/IL10/F12/ZYX/ANXA1/MIR221/RELA/LILRA5/IL20/LDLR/PPARD/NFKBIZ/APP/…
GOBP_LIPOPOLYSACCHARIDE_MEDIATED_SIGNALING_PATHWAY	GOBP_LIPOPOLYSACCHARIDE_MEDIATED_SIGNALING_PATHWAY	54	0.62146	1.78901	0.000197422	0.0121401	0.0105046	1391	tags=30%, list=8%, signal=27%	TNFAIP3/TICAM1/TGFB1/TNF/NFKBIA/MAPK3/MAPK14/CD14/NFKBIL1/IRAK1/IRF3/CD55/CCL3/PRDX2/AKT1/IL1B
GOBP_REGULATION_OF_APOPTOTIC_SIGNALING_PATHWAY	GOBP_REGULATION_OF_APOPTOTIC_SIGNALING_PATHWAY	310	0.427004	1.48214	0.000198491	0.0121401	0.0105046	3014	tags=30%, list=18%, signal=25%	NR4A2/S100A9/TNFAIP3/FAF1/HMGB2/PLEKHF1/ACVR1/TNFSF12/MAPK7/G0S2/SIAH2/TNF/PLAUR/FGFR1/XBP1/MAZ/ARRB2/BCL2/CLU/GNAI2/TRADD/BAX/PYCARD/S100A8/DDIT3/TP53/NCK2/SKIL/RIPK3/HTRA2/CDKN2D/PPP1CA/FASLG/MMP9/HYOU1/GPX1/THBS1/PRKCD/PRDX2/AKT1/HSPA1B/NDUFA13/TMC8/URI1/PINK1/PEA15/ENO1/NFE2L2/IL1B/BCL2L11/LGALS3/CD74/HSPB1/ATF3/TRAF7/PPIA/ING5/FIS1/TRAF1/BCAP31/MIR27B/PIAS4/NDUFS3/TMEM161A/UBB/ERP29/BBC3/NAC…
GOBP_AMINOGLYCAN_METABOLIC_PROCESS	GOBP_AMINOGLYCAN_METABOLIC_PROCESS	157	0.478636	1.57894	0.000202492	0.0122679	0.0106152	3496	tags=25%, list=21%, signal=20%	CHST11/B3GNT9/B3GALT6/NFKB1/TGFB1/B3GAT3/CHST2/B4GALT5/CHPF/CHST14/ST3GAL2/HS6ST1/B4GALT1/AKT1/ST3GAL1/CHPF2/IL1B/PIM1/HYAL3/NDST2/ARSB/SGSH/CLN6/VCAN/XYLT1/HYAL2/ABCC5/B4GALT7/CHSY1/XYLT2/UGDH/GLB1/SPOCK2/UST/CHST12/ST3GAL4/EXT1/HGSNAT/GALNS
GOCC_TRANSCRIPTION_REGULATOR_COMPLEX	GOCC_TRANSCRIPTION_REGULATOR_COMPLEX	367	0.411981	1.44991	0.000205768	0.0123499	0.0106862	2647	tags=23%, list=16%, signal=20%	CEBPB/NR4A2/PTOV1/FOS/SNF8/HNRNPAB/KAT2A/NR4A1/CREM/MTA1/JUNB/NR4A3/TFDP1/RFXAP/SMAD7/GFI1/MED26/TAF6L/JUN/JUND/RARG/TRIM28/RUNX3/LDB1/SMAD1/BEX1/RXRB/SNAI3/E2F4/DDIT3/TP53/RCOR1/SMAD3/SKIL/HDGF/CTBP1/TAF10/RFXANK/RELB/TAF6/SPI1/BRF1/NCOR2/NFATC2/TLE2/MED25/DRAP1/SKI/NFYC/HAX1/BCL9/CHD3/ZBTB7A/MXI1/LEF1/GTF2E2/ATF5/CBFB/CDK4/GATAD2B/TCF7/TRERF1/TLE4/HCLS1/MED8/PHF12/PKNOX1/RFX5/HMGA1/MBD3/RFX3/MA…
GOBP_RESPONSE_TO_REACTIVE_OXYGEN_SPECIES	GOBP_RESPONSE_TO_REACTIVE_OXYGEN_SPECIES	196	0.471155	1.58358	0.000212518	0.012637	0.0109346	4364	tags=45%, list=26%, signal=33%	KLF2/FOS/DUSP1/SESN2/TNFAIP3/NR4A3/UCP2/CRK/MAPK7/JUN/DNM2/RHOB/BCL2/MAPK3/PLK3/ADA/STK25/CCR7/STK24/GCH1/ROMO1/RIPK3/MMP9/GPX1/MAP1LC3A/PRKCD/PRDX2/AKT1/SIGMAR1/KDM6B/PINK1/NFE2L2/CCS/EGLN1/UCP3/CAMKK2/CBX8/ZNF580/EEF2/PRDX5/ENDOG/PPP5C/IL10/PXN/FBLN5/ANXA1/TXN/RELA/PRDX1/RPS3/HSF1/HDAC6/MAPK1/DHFR/HYAL2/ABL1/ETS1/CAT/GSTP1/TRAF2/FOXO1/BAK1/PARK7/NCF1/PDK2/TXNRD2/MAPK13/EDN1/IL18RAP/CYP1B1/MPV17…
GOBP_GLUCOSE_METABOLIC_PROCESS	GOBP_GLUCOSE_METABOLIC_PROCESS	185	0.469894	1.57551	0.000217098	0.0127908	0.0110677	2854	tags=30%, list=17%, signal=25%	SIK1/SESN2/KAT2A/CREM/PGP/PHLDA2/SIRT7/IGFBP4/TNF/FAM3C/PPP1R3D/DCXR/RORC/SLC25A1/MAPK14/POMC/CLK2/WDTC1/MIDN/TP53/SLC25A11/PPP1CA/G6PC3/PASK/PPP1R3F/KHK/AKT1/TPI1/G6PD/ENO1/FAM3A/PGAM2/AKR1A1/H6PD/SLC25A10/ATF3/AKT2/INPPL1/DGKQ/PDHB/GOT1/GAPDH/PC/GAA/GALM/PFKL/PPARD/ALDOC/MLYCD/WDR5/KAT2B/INPP5K/KBTBD2/ENO3/FABP5
GOBP_REGULATION_OF_T_CELL_DIFFERENTIATION	GOBP_REGULATION_OF_T_CELL_DIFFERENTIATION	134	0.49891	1.62603	0.000233789	0.0136491	0.0118103	2792	tags=34%, list=17%, signal=28%	SOCS1/SART1/TBX21/KAT2A/SMAD7/AP3D1/TNFRSF18/XBP1/RUNX3/RARA/NLRP3/ADA/ZC3H12A/CD83/STAT5B/PRKCZ/ADAM8/LAG3/BCL6/IL23A/PRDX2/CD27/TGFBR2/NFATC2/TOX/ZMIZ1/IL23R/CARD11/CD74/LEF1/RHOH/CBFB/TCF7/NFKBID/IL12RB1/ANXA1/ZAP70/RUNX1/FGL2/IL4R/ZBTB7B/NFKBIZ/ABL1/LGALS9/DROSHA
GOBP_AMINE_BIOSYNTHETIC_PROCESS	GOBP_AMINE_BIOSYNTHETIC_PROCESS	33	0.687941	1.80262	0.000236894	0.0137057	0.0118593	917	tags=18%, list=6%, signal=17%	NR4A2/SRM/ODC1/PAOX/GCH1/OAZ1
GOBP_NEGATIVE_REGULATION_OF_PHOSPHORYLATION	GOBP_NEGATIVE_REGULATION_OF_PHOSPHORYLATION	360	0.415422	1.46092	0.000240893	0.0138126	0.0119518	2904	tags=24%, list=18%, signal=21%	CDKN1A/DUSP5/SOCS1/DUSP2/SOCS3/DDIT4/FKBP8/DUSP1/MEN1/GADD45A/TNFAIP3/SMAD7/TGFB1/CHMP6/MYADM/TESC/ARRB2/SEMA4D/BAX/SH2B3/ZC3H12A/RGS14/ZFYVE28/PYCARD/SH3BP5/PARD6A/MIDN/VPS25/PRKCZ/SH3BP5L/NCK2/PBK/DVL1/CDKN2D/CALM3/CCNB1/DUSP16/AKT1S1/DUSP22/PKN1/PRKCD/RASSF2/AKT1/MLLT1/DUSP3/MVP/DUSP6/IL1B/SIRT2/CSK/HSPB1/PRR5L/GMFG/PPIA/PTPN13/ADARB1/TARBP2/PPP2R1A/RHOH/CTDSP2/DGKQ/GPD1L/PDE4D/MIR27B/CEP85/TE…
GOBP_NEGATIVE_REGULATION_OF_BINDING	GOBP_NEGATIVE_REGULATION_OF_BINDING	139	0.491797	1.60468	0.000256592	0.014329	0.0123986	2094	tags=26%, list=13%, signal=23%	CDKN1A/STUB1/MIR27A/ATP2A3/ZNF593/JUN/DNAJB2/MEPCE/CPNE1/RUVBL2/NFKBIA/ARRB2/MAPK3/BAX/EIF4A3/DDIT3/ACE/ZNF304/DVL1/CTNNBIP1/PPP1CA/PIN1/PEX14/ADRB2/PRKCD/AKT1/TMC8/ACTB/LEF1/PPP3CA/TMSB4X/MIR27B/ID1/GZMA/DTNBP1/IL10
GOBP_RESPONSE_TO_TUMOR_NECROSIS_FACTOR	GOBP_RESPONSE_TO_TUMOR_NECROSIS_FACTOR	281	0.426295	1.47515	0.000252862	0.014329	0.0123986	3465	tags=31%, list=21%, signal=25%	KLF2/ZFP36/TNFRSF4/KAT2A/RNF31/TNFAIP3/XCL2/NFKB1/TNFSF12/TNFRSF18/TNF/CPNE1/ZFP36L2/NFKBIA/TNFSF14/TRAF4/LTB/MAPK3/MAPK14/TRADD/ZC3H12A/PYCARD/LTA/CD14/TNFRSF25/CCL20/GCH1/PSMB10/TP53/CCL3/ILK/MAP2K7/SHARPIN/THBS1/AKT1/CD27/HSPA1B/PSMB9/FOXO3/SPATA2/TNFRSF1B/NR1D1/NFE2L2/PSMA5/HYAL3/PSME2/ZFP36L1/IKBKG/CXCL16/TRAF1/EDARADD/TMSB4X/MIR27B/PIAS4/PSMD4/GGT1/ENDOG/PSMB3/PSME1/RELA/RPS3/TNFRSF13C/COMM…
GOMF_ACTIN_BINDING	GOMF_ACTIN_BINDING	400	0.407562	1.44248	0.000255582	0.014329	0.0123986	3114	tags=24%, list=19%, signal=20%	MARCKSL1/MYOM2/MYO1D/YWHAH/GIPC1/CAPG/FMNL1/MIB2/SNTA1/ARPC1B/DIAPH1/WAS/TLN1/ANXA6/PPP1R9B/MYO9B/CROCC/BCL7B/MTSS1/PLEC/CXCR4/CFL1/LSP1/NCALD/EMD/FSCN1/DBNL/PFN1/FLNA/ERMN/CCR5/PICK1/ADD1/S100A4/MYO1F/TNNC1/FMN1/ACTR3B/CORO1A/CAPZB/SSH3/ARPC4/MYO1G/PPP1R18/KLHL5/TPM2/GSN/PSTPIP1/GJB6/ENC1/SNTB1/WHAMM/GMFG/DAG1/PARVG/MSRB2/INPPL1/WDR1/AIF1/TMSB4X/CORO7/VPS16/TMSB10/TRIOBP/CNN2/EEF2/IQGAP2/MYO1C/H…
GOBP_POSITIVE_REGULATION_OF_PRI_MIRNA_TRANSCRIPTION_BY_RNA_POLYMERASE_II	GOBP_POSITIVE_REGULATION_OF_PRI_MIRNA_TRANSCRIPTION_BY_RNA_POLYMERASE_II	39	0.665119	1.80137	0.000260086	0.0143989	0.0124591	3085	tags=41%, list=19%, signal=33%	FOS/TGFB1/JUN/TNF/SMAD1/TP53/SMAD3/SPI1/FOXO3/SMARCA4/SRF/IL10/RELA/ETS1/SREBF2/EGR1
GOBP_CHONDROITIN_SULFATE_PROTEOGLYCAN_BIOSYNTHETIC_PROCESS	GOBP_CHONDROITIN_SULFATE_PROTEOGLYCAN_BIOSYNTHETIC_PROCESS	26	0.722709	1.79954	0.000267908	0.014458	0.0125103	3239	tags=42%, list=20%, signal=34%	CHST11/B3GALT6/B3GAT3/CHPF/CHPF2/VCAN/XYLT1/CHSY1/XYLT2/UGDH/CHST12
GOBP_NEGATIVE_REGULATION_OF_IMMUNE_SYSTEM_PROCESS	GOBP_NEGATIVE_REGULATION_OF_IMMUNE_SYSTEM_PROCESS	345	0.418734	1.46841	0.000264687	0.014458	0.0125103	2527	tags=23%, list=15%, signal=20%	SOCS1/CEBPB/TBX21/PDCD1/MIR27A/DUSP1/TNFAIP3/GPR137B/TSPAN32/TYROBP/SMAD7/TGFB1/DGKZ/CRK/TNF/PVRIG/CST7/PTGER4/NME1/RUNX3/RARA/ARRB2/ADA/ZC3H12A/GPR68/PPM1B/CDK6/LAG3/TBC1D10C/PHPT1/GRN/CD55/SPN/BCL6/HMGB3/TSC22D3/GPX1/CCL3/TNFAIP8L2/THBS1/PKN1/CD68/PRDX2/AKT1/TOB2/DUSP3/NLRX1/CUEDC2/NR1D1/FAM3A/RHBDD3/LGALS3/CD74/UBASH3A/TTLL12/TARBP2/CBFB/NME2/NLRP6/NR1H2/GPR137/IL10/EMILIN1/TCTA/LST1/ANXA1/MIR…
GOBP_GLAND_DEVELOPMENT	GOBP_GLAND_DEVELOPMENT	361	0.412134	1.4496	0.000267603	0.014458	0.0125103	2695	tags=20%, list=16%, signal=17%	CEBPB/MAP2K1/TNFAIP3/CRIP1/LSR/UCP2/TGFB1/CITED2/HRAS/DEAF1/RARG/TNF/NME1/XBP1/THRA/BCL2/MAPK3/DBP/ADA/BAX/WNT1/STAT5B/DUT/FPGS/WNT10A/SMARCC1/PLXND1/SMAD3/TAF10/RIPK3/CAPN1/MTX1/STK11/GPX1/TSPO/PRKCSH/PRDX2/AKT1/ORAI1/TGFBR2/ARHGAP35/NCOR2/LIMS2/HMGCL/BCL2L11/RHBDD3/CCNB2/AKT2/DAG1/GFER/LEF1/APRT/RPS6KA1/SRF/IL10/TYMS/ANXA1/MAFB/SCRIB/RELA/HES1/ZBTB7B/MPST/NTN4/MAPK1/PHB2/CAD/ABL1/SLC9A3R1/ETS1/…
GOMF_ACTIN_FILAMENT_BINDING	GOMF_ACTIN_FILAMENT_BINDING	186	0.466851	1.56659	0.000281741	0.0150779	0.0130466	3114	tags=28%, list=19%, signal=23%	MARCKSL1/MYOM2/MYO1D/CAPG/FMNL1/ARPC1B/TLN1/ANXA6/PPP1R9B/CFL1/FSCN1/DBNL/FLNA/ERMN/PICK1/ADD1/MYO1F/TNNC1/ACTR3B/CORO1A/CAPZB/ARPC4/MYO1G/TPM2/GSN/PSTPIP1/GJB6/WDR1/AIF1/CORO7/VPS16/TRIOBP/EEF2/IQGAP2/MYO1C/HCLS1/CORO1B/HIP1R/EZR/CDK5R1/TWF2/ABL1/MYH9/FHOD1/FLII/GAS7/ACTN4/COTL1/MYO18A/ACTR3C/TPM4/MYH3/SPTBN5
GOBP_PROTEOGLYCAN_BIOSYNTHETIC_PROCESS	GOBP_PROTEOGLYCAN_BIOSYNTHETIC_PROCESS	54	0.61312	1.765	0.000309773	0.0163063	0.0141095	3405	tags=37%, list=21%, signal=29%	CHST11/B3GALT6/B3GAT3/CHPF/CHST14/HS6ST1/CHPF2/NDST2/VCAN/XYLT1/B4GALT7/CHSY1/XYLT2/UGDH/CANT1/UST/FAM20B/CHST12/CHST10/EXT1
GOBP_REGULATION_OF_CYTOSOLIC_CALCIUM_ION_CONCENTRATION	GOBP_REGULATION_OF_CYTOSOLIC_CALCIUM_ION_CONCENTRATION	290	0.434389	1.50357	0.000307939	0.0163063	0.0141095	3551	tags=25%, list=22%, signal=20%	S1PR4/GNA15/CCR9/GALR2/CXCR5/CCR6/C5AR1/PTGER4/BCL2/P2RX5/DIAPH1/BAX/CCR7/CXCR4/CCR4/DDIT3/SMAD3/CD55/CALM3/LPAR2/CCR5/FASLG/CCL3/NMB/CDK5/CD38/CORO1A/CCR10/CD52/CXCR6/CHD7/F2R/PROK2/LIME1/FIS1/MCOLN1/BCAP31/PDE4D/GPR35/CLN3/S1PR1/GNB1/GOT1/SPPL3/FPR1/OPRL1/C3AR1/LCK/CXCL10/CDH23/TBXA2R/ATP2B4/ABL1/PTPN6/NOL3/MIR199A1/RASA3/CXCR3/TRPV2/ITPR3/BAK1/CD4/F2RL2/LYN/PML/CCR2/EDN1/RIC3/PRKACA/CHERP/UBAS…
GOBP_T_CELL_DIFFERENTIATION_IN_THYMUS	GOBP_T_CELL_DIFFERENTIATION_IN_THYMUS	70	0.567463	1.69295	0.00032358	0.0168945	0.0146185	2516	tags=34%, list=15%, signal=29%	PRR7/CCR6/ZFP36L2/BCL2/ADA/WNT1/STAT5B/JMJD6/CCR7/ADAM8/TP53/RIPK3/STK11/TOX/CARD11/IL1B/CD74/ZFP36L1/CD3E/SRF/MAFB/CD3D/ZAP70/DNAJA3
GOBP_REGULATION_OF_PHOSPHOLIPASE_C_ACTIVITY	GOBP_REGULATION_OF_PHOSPHOLIPASE_C_ACTIVITY	40	0.654892	1.79275	0.000331449	0.0171659	0.0148533	963	tags=18%, list=6%, signal=17%	S1PR4/GNA15/HRAS/C5AR1/PLCB2/FGFR1/LPAR2
GOBP_SYNCYTIUM_FORMATION	GOBP_SYNCYTIUM_FORMATION	44	0.643427	1.78183	0.000335598	0.0172171	0.0148976	3981	tags=48%, list=24%, signal=36%	TYROBP/MAPK14/CD81/WNT1/SBNO2/NFATC2/ADAM12/EHD1/PLEKHO1/TCTA/DYRK1B/SCGB3A1/ERCC1/IL4R/CXCL10/MYH9/TANC1/CD53/FLOT1/CD9/CAMK1
GOBP_REGULATION_OF_SYSTEM_PROCESS	GOBP_REGULATION_OF_SYSTEM_PROCESS	472	0.396072	1.41011	0.0003378	0.0172171	0.0148976	3925	tags=23%, list=24%, signal=18%	SREBF1/LMNA/CTDP1/NR4A3/TYMP/SMAD7/ATP2A3/PDE4B/CST7/SNTA1/STK39/THRA/CDK9/PI16/SGK1/GNAI2/ANXA6/ADA/SH3GL1/ZC3H12A/EIF4A3/POMC/GCH1/PRKCZ/TPPP/ACE/SMAD3/DVL1/CALM3/FLNA/PIN1/CCL3/ADRB2/TNNC1/CD38/WNT7A/S1PR2/AKT1/G6PD/FOXO3/TNFRSF1B/F2R/ENO1/PROK2/KCNQ1/FXYD7/CACNA2D2/AHCYL1/DAG1/PPP3CA/FXYD1/GPD1L/PDE4D/MTG1/GPR35/HBEGF/NR1H2/SRF/IL10/GNAS/GAA/ATP1A1/HIP1R/DLGAP4/TBXA2R/APP/ATP2B4/SLC9A3R1/INPP…
GOBP_GLUCOCORTICOID_METABOLIC_PROCESS	GOBP_GLUCOCORTICOID_METABOLIC_PROCESS	21	0.759261	1.8115	0.000377243	0.0188973	0.0163515	2199	tags=24%, list=13%, signal=21%	STUB1/YWHAH/H6PD/DGKQ/ATP1A1
GOBP_SMAD_PROTEIN_SIGNAL_TRANSDUCTION	GOBP_SMAD_PROTEIN_SIGNAL_TRANSDUCTION	67	0.58327	1.72646	0.000379594	0.0188973	0.0163515	1416	tags=16%, list=9%, signal=15%	FOS/SMAD7/TGFB1/JUN/SMAD1/FAM89B/SH2B1/SMAD3/TOB1/ZMIZ1/SKI
GOBP_TRANSFORMING_GROWTH_FACTOR_BETA_RECEPTOR_SIGNALING_PATHWAY	GOBP_TRANSFORMING_GROWTH_FACTOR_BETA_RECEPTOR_SIGNALING_PATHWAY	184	0.466351	1.56085	0.000379228	0.0188973	0.0163515	2211	tags=23%, list=13%, signal=20%	CHST11/STUB1/FOS/MEN1/FURIN/SMAD7/TGFB1/GIPC1/CITED2/ACVR1/JUN/DNM2/ARRB2/SMAD1/WNT1/FAM89B/PARD6A/PRKCZ/TP53/SMAD3/SKIL/LTBP3/STK11/DUSP22/PIN1/THBS1/RASL11B/ARHGEF18/TGFBR2/TAB1/ZMIZ1/SKI/ZBTB7A/GLG1/BAMBI/ID1/DAND5/UBB/GOT1/EMILIN1/PXN/ZYX
GOBP_DEPHOSPHORYLATION	GOBP_DEPHOSPHORYLATION	427	0.400309	1.41894	0.000385375	0.0190375	0.0164729	2848	tags=25%, list=17%, signal=21%	DUSP5/DUSP2/PTPN18/PFKFB3/DUSP1/PSPH/MYO1D/PPP1R15A/PGP/CTDP1/WDR81/PDXP/PTPRA/TGFB1/SGPP1/B3GAT3/TNF/PTPN9/PPP1R3D/BOD1/PPP1R35/PTP4A3/BCL2/SEMA4D/GNAI2/MGAT5/PPP1R9B/PPM1B/INPP4A/SBF1/DUSP28/CTDSP1/PPP1R14B/PHPT1/SMAD3/IMPA2/PPP4C/INPP5E/RIPK3/CSRNP2/PNKP/CTDNEP1/CALM3/PPP1CA/G6PC3/DUSP16/ACP2/STK11/NT5C/DUSP22/PIN1/LHPP/PRKCD/PPP2R5B/DUSP3/PPP1R14A/SSH3/URI1/PINK1/DUSP6/CDC25B/LGALS3/PPM1M/NUD…
GOBP_POSITIVE_REGULATION_OF_APOPTOTIC_SIGNALING_PATHWAY	GOBP_POSITIVE_REGULATION_OF_APOPTOTIC_SIGNALING_PATHWAY	114	0.512154	1.64303	0.000389944	0.0191162	0.0165409	3308	tags=40%, list=20%, signal=32%	S100A9/FAF1/PLEKHF1/TNFSF12/G0S2/TNF/BCL2/BAX/PYCARD/S100A8/DDIT3/TP53/NCK2/SKIL/RIPK3/HTRA2/PPP1CA/THBS1/PRKCD/PEA15/BCL2L11/ATF3/TRAF7/ING5/FIS1/BCAP31/MIR27B/PIAS4/UBB/BBC3/NACC2/BCL2L1/TRIM39/SFPQ/RPS3/LCK/HYAL2/SLC9A3R1/TRAF2/MIR26B/MCL1/ITM2C/FADD/PARK7/RBCK1/PML
GOMF_CHEMOKINE_BINDING	GOMF_CHEMOKINE_BINDING	29	0.700635	1.7937	0.000400539	0.0193692	0.0167598	1289	tags=38%, list=8%, signal=35%	ZFP36/CCR9/CXCR5/CCR6/CCR7/CXCR4/CCR4/PLP2/CCR5/CCR10/CXCR6
GOBP_T_CELL_MIGRATION	GOBP_T_CELL_MIGRATION	58	0.598321	1.73341	0.000404963	0.0193692	0.0167598	3865	tags=57%, list=23%, signal=44%	XCL2/TMEM102/CRK/CCR6/STK39/PYCARD/ITGB7/CCL20/ADAM8/RIPK3/SPN/CCL3/PIK3CD/MYO1G/CXCL16/AIF1/S1PR1/ZAP70/IL27RA/CXCL10/APP/SLC12A2/ICAM1/CXCR3/TNFRSF14/FADD/CD99L2/CCR2/ITGA4/CCL5/GPR183/MSN/DOCK8
GOBP_PEPTIDYL_TYROSINE_DEPHOSPHORYLATION	GOBP_PEPTIDYL_TYROSINE_DEPHOSPHORYLATION	94	0.527751	1.65584	0.000404367	0.0193692	0.0167598	2035	tags=22%, list=12%, signal=20%	DUSP5/DUSP2/PTPN18/DUSP1/PGP/PTPRA/PTPN9/PTP4A3/DUSP28/DUSP16/DUSP22/DUSP3/SSH3/DUSP6/CDC25B/PTPN13/CDC25A/TIMM50/PTP4A1/DUSP4/DUSP23
GOBP_POSITIVE_REGULATION_OF_LYMPHOCYTE_DIFFERENTIATION	GOBP_POSITIVE_REGULATION_OF_LYMPHOCYTE_DIFFERENTIATION	94	0.527699	1.65568	0.000410186	0.0193692	0.0167598	3926	tags=47%, list=24%, signal=36%	SOCS1/SART1/AP3D1/XBP1/RUNX3/RARA/NLRP3/ADA/CD83/STAT5B/PRKCZ/ADAM8/BCL6/IL23A/CD27/TGFBR2/TOX/ZMIZ1/IL23R/CD74/LEF1/RHOH/CBFB/NFKBID/IL12RB1/IL10/ANXA1/ZAP70/RUNX1/IL4R/ZBTB7B/NFKBIZ/ATP11C/LGALS9/GAS6/PNP/PCID2/RIPK2/SOX4/CR1/MIR21/SASH3/PIK3R6/LILRB2
GOBP_AGING	GOBP_AGING	266	0.436368	1.50373	0.000408454	0.0193692	0.0167598	3308	tags=31%, list=20%, signal=25%	CDKN1A/FOS/MAP2K1/FZR1/SREBF1/LMNA/NFKB2/UCP2/HRAS/JUN/JUND/BCL2/MAPK3/YBX1/MAPK14/ADA/MIR590/WNT1/PPP1R9B/CDK6/NUDT1/IRAK1/TP53/ROMO1/SIRT3/HTRA2/BCL6/FOXO4/TSPO/SPI1/CD68/PRKCD/AKT1/YPEL3/TGFBR2/TNFRSF1B/ZMIZ1/NFE2L2/LONP1/UCP3/GSN/GJB6/DAG1/PPP3CA/TPRA1/ULK3/NEK6/EEF2/MAP3K3/ENDOG/SRF/CALR/IL10/TYMS/HMGA1/TERC/MBD3/CARM1/RELA/DNMT3A/ERCC1/MNT/DNAJA3/APP/MAPK1/HYAL2/BCL2L12/ABL1/CAT/PRMT6/RPN2/…
GOBP_REGULATION_OF_OSTEOCLAST_DIFFERENTIATION	GOBP_REGULATION_OF_OSTEOCLAST_DIFFERENTIATION	57	0.604533	1.74831	0.000432108	0.019964	0.0172745	2437	tags=33%, list=15%, signal=29%	CEBPB/FOS/GPR137B/TYROBP/TNF/GPR68/CCL3/IL23A/RASSF2/TOB2/IL23R/ATP6AP1/TFE3/GPR137/TCTA/GNAS/MAFB/PIK3R1/IL20
GOBP_ANATOMICAL_STRUCTURE_MATURATION	GOBP_ANATOMICAL_STRUCTURE_MATURATION	181	0.459769	1.53664	0.000427136	0.019964	0.0172745	3557	tags=23%, list=22%, signal=18%	CDKN1A/NR4A2/KLF2/CCR6/B4GALT5/THBS3/LYL1/BCL2/SEMA4D/WNT1/FAM210B/DDIT3/BFSP1/CCNB1/PICK1/G6PD/AKR1B1/CDC25B/SIRT2/RND1/ZBTB7A/DAG1/CBFB/S1PR1/TYMS/RFX3/CABYR/HES1/RERE/NTN4/CDK5R1/APP/XYLT1/TUSC2/PLD6/ERCC2/ANKRD17/C1QA/CEBPA/SNX10/PRKACA/TRIP13
GOBP_SKELETAL_SYSTEM_DEVELOPMENT	GOBP_SKELETAL_SYSTEM_DEVELOPMENT	396	0.403514	1.42749	0.000430374	0.019964	0.0172745	2937	tags=17%, list=18%, signal=14%	CHST11/CSRNP1/KAT2A/TYROBP/SMAD7/TGFB1/DEAF1/RARG/PTGER4/FGFR1/THBS3/RUNX3/THRA/MAPK3/VKORC1/FUZ/SEMA4D/TGFBI/ANXA6/MAPK14/TMEM119/SMAD1/NAB1/SH2B3/GPR68/WNT1/EIF4A3/FST/TULP3/TP53/SMAD3/LTBP3/ANXA2/MMP9/WNT7A/FMN1/RASSF2/MTHFD1L/TGFBR2/PEX7/CHD7/SKI/ATP6AP1/HYAL3/MEF2D/GLG1/INPPL1/CHADL/SRF/GNAS/TYMS/PRDX1/RUNX1/VCAN/WDR5/XYLT1/HYAL2/PTPN6/EBP/RUNX2/PHEX/CHSY1/SLC38A10/ENG/ANKRD11/SNAI1/RPL13
GOBP_T_CELL_DIFFERENTIATION_INVOLVED_IN_IMMUNE_RESPONSE	GOBP_T_CELL_DIFFERENTIATION_INVOLVED_IN_IMMUNE_RESPONSE	70	0.559884	1.67034	0.000436672	0.0200308	0.0173323	2907	tags=40%, list=18%, signal=33%	BCL3/TBX21/SMAD7/PTGER4/RORC/RARA/NLRP3/ZC3H12A/PRKCZ/IL6R/SPN/BCL6/RELB/FCER1G/IL23A/IL23R/SLAMF6/LEF1/NFKBID/IL12RB1/EOMES/ANXA1/FGL2/IL4R/ZBTB7B/NFKBIZ/LGALS9/SEMA4A
GOBP_REGULATION_OF_PRODUCTION_OF_SMALL_RNA_INVOLVED_IN_GENE_SILENCING_BY_RNA	GOBP_REGULATION_OF_PRODUCTION_OF_SMALL_RNA_INVOLVED_IN_GENE_SILENCING_BY_RNA	25	0.728652	1.7933	0.000442222	0.0200471	0.0173464	1989	tags=44%, list=12%, signal=39%	MAP2K1/TGFB1/MAP2K2/TNF/ZC3H12A/RMRP/TP53/NCOR2/TARBP2/PPP3CA/ZC3H10
GOCC_COLLAGEN_CONTAINING_EXTRACELLULAR_MATRIX	GOCC_COLLAGEN_CONTAINING_EXTRACELLULAR_MATRIX	353	0.409486	1.43681	0.000443271	0.0200471	0.0173464	2493	tags=14%, list=15%, signal=13%	S100A9/TGFB1/ATRN/MEGF9/COL6A2/THBS3/CLU/TGFBI/ANXA6/FGFBP3/RELL2/COLQ/S100A8/LGALS1/HDGF/S100A6/CTSH/LTBP3/ANXA2/MMP9/S100A4/THBS1/ANXA5/ADAMTS10/LGALS3/S100A10/CD151/DAG1/CTSD/CTSF/CHADL/ANXA11/LGALS3BP/COL18A1/ADAM19/CFP/CALR/CASK/EMILIN1/FBLN5/MXRA7/F12/FCN1/ANXA1/SPON1/MATN2/EMILIN2/ADAMTSL4/FGL2/VCAN/NTN4
GOBP_MONOSACCHARIDE_BIOSYNTHETIC_PROCESS	GOBP_MONOSACCHARIDE_BIOSYNTHETIC_PROCESS	85	0.543979	1.67231	0.000452505	0.0201805	0.0174618	2847	tags=34%, list=17%, signal=28%	SIK1/SESN2/KAT2A/PGP/SIRT7/FAM3C/SLC25A1/CLK2/SLC25A11/G6PC3/TALDO1/TPI1/G6PD/ENO1/FAM3A/PGD/AKR1B1/PGAM2/AKR1A1/SLC25A10/ATF3/DGKQ/GOT1/GAPDH/PC/ALDOC/WDR5/KAT2B/ENO3
GOBP_NEGATIVE_REGULATION_OF_INTRACELLULAR_SIGNAL_TRANSDUCTION	GOBP_NEGATIVE_REGULATION_OF_INTRACELLULAR_SIGNAL_TRANSDUCTION	452	0.397558	1.4128	0.000449419	0.0201805	0.0174618	3331	tags=30%, list=20%, signal=25%	DUSP5/DUSP2/DDIT4/DUSP1/MEN1/SESN2/PER1/MAPKAP1/TNFAIP3/MYADM/LEMD2/MAPK7/TMEM127/PLAUR/CPNE1/XBP1/PIK3R2/ARRB2/BCL2/CLU/NLRP3/MAPK14/MIR590/SH2B3/TNIP1/ZC3H12A/RGS14/PYCARD/PPM1B/LIF/CDC34/DDIT3/TBC1D10C/RASAL3/INPP5E/PBK/SIRT3/HTRA2/CDKN2D/DUSP16/STK11/BCL6/AKT1S1/MMP9/PIN1/HYOU1/GPX1/THBS1/LZTR1/PRKCD/PPP2R5B/HDAC7/RASSF2/AKT1/DUSP3/IFI35/NDUFA13/NLRX1/ARHGAP35/URI1/PINK1/NR1D1/ABCA7/DUSP6/ENO…
GOMF_C_C_CHEMOKINE_BINDING	GOMF_C_C_CHEMOKINE_BINDING	20	0.749787	1.77362	0.000462408	0.0204303	0.017678	1289	tags=50%, list=8%, signal=46%	ZFP36/CCR9/CXCR5/CCR6/CCR7/CXCR4/CCR4/CCR5/CCR10/CXCR6
GOBP_BONE_REMODELING	GOBP_BONE_REMODELING	78	0.553957	1.68705	0.000464767	0.0204303	0.017678	2090	tags=23%, list=13%, signal=20%	TNFAIP3/GPR137B/TGFB1/NCDN/TMEM119/RAC2/ADAM8/LTBP3/DEF8/ADRB2/CD38/RASSF2/CSK/ATP6AP1/ACP5/TCIRG1/S1PR1/GPR137
GOBP_NEGATIVE_REGULATION_OF_CYTOKINE_PRODUCTION	GOBP_NEGATIVE_REGULATION_OF_CYTOKINE_PRODUCTION	287	0.420183	1.45709	0.000467652	0.0204303	0.017678	3465	tags=30%, list=21%, signal=24%	BCL3/KLF2/ZFP36/TBX21/FURIN/MIR197/TNFAIP3/TYROBP/NFKB1/SMAD7/TGFB1/MIR302C/MIR320A/RPS6KA4/TNF/PTGER4/CHID1/RARA/ARRB2/NLRP3/MIR590/ZC3H12A/CD83/LAPTM4B/PYCARD/PPM1B/POMC/CCR7/ISG15/NFKBIL1/LAG3/DDIT3/IRF3/ABCD1/IKBKE/BCL6/RELB/PIN1/OTUD5/TSPO/THBS1/IL23A/HDAC7/NLRX1/IL23R/CUEDC2/NUTF2/CSK/ASB1/SRGN/LEF1/TMSB4X/MIR27B/MC1R/UBA7/IL10/ANXA1/MIR221/BST2/LILRA5/EZR/IL27RA/MUL1/GIT1/PTPN6/GSTP1/TUSC2…
GOBP_PROTEIN_DEPHOSPHORYLATION	GOBP_PROTEIN_DEPHOSPHORYLATION	299	0.418311	1.44977	0.000484249	0.0210125	0.0181817	2848	tags=27%, list=17%, signal=23%	DUSP5/DUSP2/PTPN18/DUSP1/PPP1R15A/PGP/CTDP1/PDXP/PTPRA/TGFB1/B3GAT3/TNF/PTPN9/PPP1R3D/BOD1/PPP1R35/PTP4A3/BCL2/GNAI2/MGAT5/PPP1R9B/PPM1B/SBF1/DUSP28/CTDSP1/PPP1R14B/PHPT1/PPP4C/CTDNEP1/CALM3/PPP1CA/DUSP16/STK11/DUSP22/PIN1/LHPP/PRKCD/PPP2R5B/DUSP3/PPP1R14A/SSH3/URI1/PINK1/DUSP6/CDC25B/LGALS3/PPM1M/PPIA/PPP1R10/PTPN13/PHLPP2/PPP2R1A/PPP3CA/CTDSP2/CPPED1/CDC25A/TIMM50/PTP4A1/PPP1R16A/PPP6R1/DUSP4/S…
GOBP_CELLULAR_RESPONSE_TO_LIPID	GOBP_CELLULAR_RESPONSE_TO_LIPID	483	0.389561	1.38879	0.000494406	0.0213092	0.0184385	3339	tags=26%, list=20%, signal=21%	CEBPB/ZFP36/DDIT4/SREBF1/PER1/GRAMD1A/TNFAIP3/TICAM1/NR4A3/NFKB1/HMGB2/YWHAH/TGFB1/GFI1/TESC/PDE4B/RARG/TNF/RORC/ZFP36L2/RUVBL2/NFKBIA/NME1/XBP1/MAPK3/CLU/SGK1/NLRP3/MAPK14/LTK/ZC3H12A/PPP1R9B/PYCARD/CD14/RXRB/FAM210B/NFKBIL1/ADCY3/IRAK1/WBP2/IRF3/CD55/HTRA2/CCNB1/CCR5/CCL3/TSPO/ESRRA/SBNO2/CD68/PRDX2/AKT1/NDUFA13/NCOR2/URI1/TNFRSF1B/ZMIZ1/NR1D1/IL1B/BCL2L11/RHOXF1/PIM1/ZBTB7A/ZFP36L1/DAG1/TNIP2/…
GOBP_OSSIFICATION	GOBP_OSSIFICATION	339	0.410126	1.43889	0.000498912	0.0213601	0.0184825	1977	tags=17%, list=12%, signal=15%	CEBPB/MIR27A/MEN1/ALYREF/JUNB/TP53INP2/SMAD7/TGFB1/ACVR1/SIRT7/JUND/TNF/PTGER4/THBS3/RUNX3/THRA/BCL2/MAPK3/SEMA4D/MAPK14/TMEM119/SMAD1/NAB1/CDK6/ISG15/SMAD3/RRAS2/IL6R/CTNNBIP1/LTBP3/MMP9/CCL3/RDH14/RRBP1/ADRB2/OSTF1/SBNO2/HDAC7/RASSF2/AKT1/TOB2/TOB1/PEX7/SKI/ALOX5/ATP6AP1/IFITM1/MEF2D/SRGN/BAMBI/LEF1/INPPL1/ACP5/TCIRG1/CBFB/S1PR1/FBXL15/DHX36
GOCC_RNA_POLYMERASE_II_TRANSCRIPTION_REGULATOR_COMPLEX	GOCC_RNA_POLYMERASE_II_TRANSCRIPTION_REGULATOR_COMPLEX	159	0.47776	1.57879	0.000509556	0.0216713	0.0187518	2647	tags=30%, list=16%, signal=25%	CEBPB/FOS/HNRNPAB/KAT2A/CREM/JUNB/TFDP1/RFXAP/SMAD7/MED26/TAF6L/JUN/JUND/TRIM28/RUNX3/LDB1/SMAD1/RXRB/E2F4/DDIT3/TP53/SMAD3/TAF10/RFXANK/TAF6/DRAP1/NFYC/BCL9/MXI1/LEF1/GTF2E2/CBFB/TCF7/TLE4/MED8/RFX5/HMGA1/MED14/SFPQ/GTF2H4/MNAT1/RUNX1/TADA3/E2F1/HYAL2/ATF6B/SUPT3H
GOBP_POSITIVE_T_CELL_SELECTION	GOBP_POSITIVE_T_CELL_SELECTION	35	0.664027	1.76593	0.000516081	0.0217879	0.0188527	2330	tags=43%, list=14%, signal=37%	TBX21/BCL2/IL6R/SPN/STK11/IL23A/TOX/IL23R/CD74/SLAMF6/CD3E/SRF/IL12RB1/CD3D/ZAP70
GOMF_PHOSPHOPROTEIN_PHOSPHATASE_ACTIVITY	GOMF_PHOSPHOPROTEIN_PHOSPHATASE_ACTIVITY	167	0.461325	1.5339	0.000519083	0.0217879	0.0188527	2555	tags=28%, list=15%, signal=24%	DUSP5/DUSP2/PTPN18/DUSP1/PGP/CTDP1/PDXP/PTPRA/PTPN9/PPP1R3D/PTP4A3/PPM1B/SBF1/DUSP28/CTDSP1/PHPT1/PPP4C/CTDNEP1/PPP1CA/DUSP16/DUSP22/LHPP/DUSP3/SSH3/DUSP6/CDC25B/PPM1M/PTPN13/PHLPP2/PPP2R1A/PPP3CA/CTDSP2/CPPED1/CDC25A/TIMM50/PTP4A1/DUSP4/DUSP23/PPP5C/SSU72/PPP2R5A/LCK/PPM1N/PPM1F/PTPRJ/PTPN23
GOBP_ADAPTIVE_IMMUNE_RESPONSE	GOBP_ADAPTIVE_IMMUNE_RESPONSE	354	0.413063	1.4501	0.000540759	0.0225503	0.0195124	3486	tags=29%, list=21%, signal=24%	BCL3/TBX21/PDCD1/UNC93B1/PRR7/TNFAIP3/NFKB2/PRKD2/SMAD7/TGFB1/HRAS/CCR6/TNF/IL4I1/RORC/CLU/WAS/NLRP3/CD7/ADA/CD81/ZC3H12A/PYCARD/LTA/PRKCQ/PRKCZ/LAG3/IL6R/RIPK3/CD55/EXOSC6/DBNL/CTSH/SPN/IL17RA/FUT7/BCL6/UNC13D/RELB/FCER1G/PKN1/PIK3CD/PRKCD/IL23A/CD27/ORAI1/IRF7/CLCF1/PRKCB/MYO1G/TNFRSF1B/IL23R/IL1B/CSK/CD74/LIME1/LAT/SKAP1/SLAMF6/TFE3/LEF1/MCOLN1/CD3E/TCIRG1/NFKBID/IL12RB1/IL10/EOMES/ANXA1/IGLL5…
GOBP_IMMUNE_RESPONSE_REGULATING_SIGNALING_PATHWAY	GOBP_IMMUNE_RESPONSE_REGULATING_SIGNALING_PATHWAY	366	0.406654	1.43118	0.000574847	0.0238172	0.0206086	4345	tags=41%, list=26%, signal=31%	FOS/RNF31/PRKD2/NR4A3/TYROBP/NFKB1/DGKZ/CRK/HRAS/PDE4B/JUN/C5AR1/PVRIG/KHDRBS1/PIK3R2/BCL2/MAPK3/ARPC1B/WAS/ADA/CD81/BAX/ZC3H12A/CCR7/PRKCQ/PSMB10/ICAM2/PHPT1/KCNN4/BAG6/CTSH/STK11/RELB/MAP2K7/FCER1G/CD38/PIK3CD/PRKCD/MAP2K4/DUSP3/PSMB9/NFATC2/PRKCB/ARPC4/MYO1G/TAB1/CARD11/RAPGEF1/LGALS3/PSMA5/CSK/LIME1/LAT/PLA2G6/SKAP1/UBASH3A/PSME2/ACTB/IKBKG/PPP3CA/CD3E/EIF2B5/PDE4D/ACTG1/STOML2/PLD2/CBFB/PSMD…
GOBP_THYROID_GLAND_DEVELOPMENT	GOBP_THYROID_GLAND_DEVELOPMENT	19	0.761738	1.78159	0.000596341	0.0245494	0.0212421	2558	tags=32%, list=16%, signal=27%	MAP2K1/THRA/MAPK3/SMAD3/SRF/MAPK1
GOMF_PHOSPHATASE_ACTIVITY	GOMF_PHOSPHATASE_ACTIVITY	234	0.436221	1.49009	0.000603978	0.0247054	0.0213771	2555	tags=25%, list=15%, signal=22%	DUSP5/DUSP2/PTPN18/PFKFB3/DUSP1/PSPH/PGP/CTDP1/PDXP/PTPRA/SGPP1/PTPN9/PPP1R3D/PTP4A3/PPM1B/INPP4A/SBF1/DUSP28/CTDSP1/PHPT1/IMPA2/PPP4C/INPP5E/PNKP/CTDNEP1/PPP1CA/G6PC3/DUSP16/ACP2/NT5C/DUSP22/LHPP/DUSP3/SSH3/DUSP6/CDC25B/PPM1M/NUDT16/PTPN13/PHLPP2/PPP2R1A/PPP3CA/CTDSP2/ACP5/CPPED1/CDC25A/TIMM50/PTP4A1/DUSP4/DUSP23/PPP5C/SSU72/ATP1A1/PPP2R5A/LCK/PPM1N/PPM1F/PTPRJ/PTPN23
GOBP_POSITIVE_REGULATION_OF_FAT_CELL_DIFFERENTIATION	GOBP_POSITIVE_REGULATION_OF_FAT_CELL_DIFFERENTIATION	55	0.592771	1.70924	0.000625259	0.025414	0.0219903	2491	tags=27%, list=15%, signal=23%	CEBPB/ZFP36/CREBL2/XBP1/MAPK14/METRNL/ZC3H12A/AKT1/PIM1/TFE3/ZFP36L1/SYAP1/CARM1/ZBTB7B/PPARD
GOBP_SMALL_MOLECULE_CATABOLIC_PROCESS	GOBP_SMALL_MOLECULE_CATABOLIC_PROCESS	390	0.395794	1.39593	0.000655565	0.0264782	0.0229111	3007	tags=25%, list=18%, signal=21%	SESN2/PDXP/TYMP/GLUL/HAGH/IL4I1/DCXR/ECI1/ADA/ACSF3/NUDT1/GALK1/ALDH1B1/NAGK/TP53/ACOT8/NUDT18/IMPA2/GLYCTK/MCAT/INPP5E/GCDH/ABCD1/HSD17B10/BCAT2/TYSND1/FUT7/AMDHD2/NT5C/PCBD1/BCKDHA/FUT4/GALT/KHK/AKT1/ACADVL/TPI1/PEX7/PCCB/GPD2/HMGCL/OGDH/ENO1/PGD/PGAM2/TXN2/AKR1A1/NUDT16/DECR2/ECH1/AKT2/ETFB/ACOX3/UPP1/PNKD/ACAD10/PECR/NUDT7/FAAH/APOBEC3C/ECHS1/CARNS1/APOBEC3A/GOT1/GAPDH/RBKS/ACADS/ACAA1/CPT2/C…
GOBP_LIPID_MODIFICATION	GOBP_LIPID_MODIFICATION	243	0.436813	1.49424	0.000685799	0.0275263	0.023818	2994	tags=28%, list=18%, signal=23%	SOCS1/SOCS3/MIR27A/SESN2/NR4A3/PI4K2A/DGKZ/SGPP1/TTC7A/PIP5K1C/CERK/PIK3R2/CISH/ECI1/MBOAT7/MAPK14/ACOT8/IMPA2/MCAT/INPP5E/GCDH/ABCD1/HSD17B10/TYSND1/SLC35C1/ST3GAL2/PIK3CD/AKT1/ACADVL/PI4K2B/PEX7/ABCA2/ALOX5/LAMTOR1/ABCG1/DECR2/ECH1/AKT2/ETFB/ACOX3/INPPL1/DGKQ/ACAD10/PECR/MIR27B/FABP3/ECHS1/SPHK2/DGKA/ACADS/ACAA1/CPT2/CRAT/PIK3R1/IP6K1/MBOAT1/PPARD/ABCD4/MLYCD/ITPKC/INPP5K/PI4KA/AUH/BDH2/LPCAT3/…
GOMF_PHOSPHORIC_ESTER_HYDROLASE_ACTIVITY	GOMF_PHOSPHORIC_ESTER_HYDROLASE_ACTIVITY	322	0.413464	1.44299	0.00069334	0.0276561	0.0239303	2100	tags=20%, list=13%, signal=18%	DUSP5/DUSP2/PTPN18/PFKFB3/DUSP1/PSPH/PGP/CTDP1/PDXP/GDPD5/PTPRA/SGPP1/PDE4B/PLCB2/PTPN9/PPP1R3D/PTP4A3/PPM1B/INPP4A/SBF1/DUSP28/CTDSP1/PHPT1/IMPA2/PPP4C/INPP5E/PNKP/CTDNEP1/PPP1CA/G6PC3/DUSP16/ACP2/PLCD1/NT5C/CCR5/DUSP22/LHPP/DUSP3/SSH3/PLD3/DUSP6/CDC25B/PPM1M/NUDT16/SMPD2/PTPN13/PHLPP2/PPP2R1A/PPP3CA/CTDSP2/ACP5/CPPED1/PDE4D/HDDC3/PLD2/CDC25A/TIMM50/GNB1/PTP4A1/APEX2/DUSP4/DUSP23/PDE8B/PPP5C/SSU…
GOMF_PROTEIN_TYROSINE_PHOSPHATASE_ACTIVITY	GOMF_PROTEIN_TYROSINE_PHOSPHATASE_ACTIVITY	93	0.528039	1.65104	0.00070206	0.027831	0.0240817	2035	tags=23%, list=12%, signal=20%	DUSP5/DUSP2/PTPN18/DUSP1/PGP/PTPRA/PTPN9/PTP4A3/DUSP28/DUSP16/DUSP22/DUSP3/SSH3/DUSP6/CDC25B/PTPN13/CDC25A/TIMM50/PTP4A1/DUSP4/DUSP23
GOBP_I_KAPPAB_KINASE_NF_KAPPAB_SIGNALING	GOBP_I_KAPPAB_KINASE_NF_KAPPAB_SIGNALING	263	0.42011	1.44566	0.000709554	0.0279555	0.0241894	3257	tags=37%, list=20%, signal=30%	BCL3/S100A12/PER1/RNF31/TNFAIP3/TICAM1/CC2D1A/TNF/MIB2/CPNE1/NFKBIA/TRAF4/TRADD/TNIP1/ZC3H12A/JMJD8/PYCARD/PPM1B/CCR7/CD14/NFKBIL1/IRAK1/LGALS1/TMEM101/IRF3/RIPK3/BRD4/FLNA/IKBKE/RELB/FASLG/S100A4/SHARPIN/AKT1/NLRX1/PINK1/PRKCB/TRIM8/F2R/TAB1/NR1D1/CARD11/IL1B/CD74/HSPB1/SHISA5/LIME1/IKBKG/TNIP2/TRAF1/RHOH/TRIM62/MIR27B/NEK6/SPHK2/NLRP6/MAP3K3/UBB/DHX36/CCDC22/PPP5C/PELI2/BST2/TRIM39/RELA/TRIM14/…
GOMF_GLUCOCORTICOID_RECEPTOR_BINDING	GOMF_GLUCOCORTICOID_RECEPTOR_BINDING	12	0.85507	1.82279	0.000748562	0.0283289	0.0245125	1223	tags=67%, list=7%, signal=62%	CEBPB/NR4A2/NR4A1/NR4A3/YWHAH/STAT5B/SMAD3/NCOR2
GOBP_CHONDROITIN_SULFATE_BIOSYNTHETIC_PROCESS	GOBP_CHONDROITIN_SULFATE_BIOSYNTHETIC_PROCESS	23	0.727954	1.77515	0.000747996	0.0283289	0.0245125	3239	tags=43%, list=20%, signal=35%	CHST11/B3GALT6/CHPF/CHPF2/VCAN/XYLT1/CHSY1/XYLT2/UGDH/CHST12
GOBP_ACTIVATION_OF_PHOSPHOLIPASE_C_ACTIVITY	GOBP_ACTIVATION_OF_PHOSPHOLIPASE_C_ACTIVITY	27	0.691348	1.7352	0.000742439	0.0283289	0.0245125	963	tags=19%, list=6%, signal=17%	S1PR4/GNA15/C5AR1/PLCB2/LPAR2
GOBP_T_CELL_ACTIVATION_INVOLVED_IN_IMMUNE_RESPONSE	GOBP_T_CELL_ACTIVATION_INVOLVED_IN_IMMUNE_RESPONSE	99	0.517629	1.63103	0.000736509	0.0283289	0.0245125	2544	tags=30%, list=15%, signal=26%	BCL3/TBX21/SMAD7/PTGER4/RORC/RARA/NLRP3/CD81/ZC3H12A/PRKCZ/TP53/IL6R/SPN/BCL6/RELB/FCER1G/IL23A/IL23R/LGALS3/CD74/SLAMF6/LEF1/NFKBID/IL12RB1/EOMES/ANXA1/FGL2/IL4R/ZBTB7B/NFKBIZ
GOBP_SKELETAL_MUSCLE_ORGAN_DEVELOPMENT	GOBP_SKELETAL_MUSCLE_ORGAN_DEVELOPMENT	122	0.500199	1.61078	0.000727355	0.0283289	0.0245125	1911	tags=21%, list=12%, signal=19%	FOS/MYOM2/MSC/BTG2/SAP30/TGFB1/LEMD2/BCL2/MAPK14/MAFF/EMD/GPX1/CDK5/HMG20B/SKI/HLF/BCL9/VAMP5/USP19/ATF3/MEF2D/MYL6/DAG1/PPP3CA/EEF2/ASB2
GOBP_GRANULOCYTE_MIGRATION	GOBP_GRANULOCYTE_MIGRATION	122	0.497399	1.60176	0.000749908	0.0283289	0.0245125	3435	tags=35%, list=21%, signal=28%	S100A12/S100A9/XCL2/PDE4B/C5AR1/BSG/PTGER4/PIP5K1C/MAPK3/PREX1/CCR7/CCL20/RAC2/S100A8/ADAM8/FUT7/RHOG/CCL3/FCER1G/THBS1/PIK3CD/IL23A/CKLF/LGALS3/IL17RC/CD74/PPIA/RHOH/WDR1/ANXA1/VAV1/C3AR1/CXCL10/MAPK1/MPP1/CAMK1D/NOD2/PPBP/MYD88/CD99L2/RAC1/EDN1/CCL5
GOBP_REGULATION_OF_LYMPHOCYTE_DIFFERENTIATION	GOBP_REGULATION_OF_LYMPHOCYTE_DIFFERENTIATION	162	0.468638	1.55722	0.000741454	0.0283289	0.0245125	2792	tags=31%, list=17%, signal=26%	SOCS1/SART1/TBX21/KAT2A/SMAD7/AP3D1/TNFRSF18/ZFP36L2/XBP1/RUNX3/RARA/NLRP3/ADA/ZC3H12A/CD83/STAT5B/PRKCZ/ADAM8/LAG3/BCL6/HMGB3/IL23A/PRDX2/CD27/TGFBR2/NFATC2/TOX/ZMIZ1/IL23R/CARD11/CD74/ZFP36L1/LEF1/RHOH/CBFB/TCF7/NFKBID/IL12RB1/IL10/ANXA1/ZAP70/RUNX1/FGL2/IL4R/ZBTB7B/NFKBIZ/ABL1/ATP11C/PTPN6/LGALS9/DROSHA
GOMF_MAP_KINASE_KINASE_ACTIVITY	GOMF_MAP_KINASE_KINASE_ACTIVITY	17	0.770955	1.76356	0.000773469	0.0290481	0.0251348	1570	tags=53%, list=10%, signal=48%	MAP2K1/MAP2K2/MAPK3/MAPK14/PBK/MAP2K7/MAP2K4/MAP2K3/MAPKAPK3
GOBP_POSITIVE_REGULATION_OF_CHONDROCYTE_DIFFERENTIATION	GOBP_POSITIVE_REGULATION_OF_CHONDROCYTE_DIFFERENTIATION	16	0.767539	1.73143	0.000780721	0.0291499	0.0252229	821	tags=12%, list=5%, signal=12%	SMAD7/SMAD3
GOBP_HISTONE_MRNA_METABOLIC_PROCESS	GOBP_HISTONE_MRNA_METABOLIC_PROCESS	22	-0.693363	-1.88164	0.000787164	0.0292206	0.0252841	2209	tags=59%, list=13%, signal=51%	SNRPF/CPSF3/NCBP2/SNRPG/EXOSC10/LSM10/MTPAP/SNRPE/ATM/NCBP1/SSB/XRN1/DCP2
GOBP_REGULATION_OF_STRESS_ACTIVATED_PROTEIN_KINASE_SIGNALING_CASCADE	GOBP_REGULATION_OF_STRESS_ACTIVATED_PROTEIN_KINASE_SIGNALING_CASCADE	166	0.46203	1.53499	0.000808306	0.0296625	0.0256665	1778	tags=22%, list=11%, signal=20%	GADD45G/MAP2K1/DUSP1/GADD45B/MEN1/PER1/GADD45A/HRAS/MAP2K2/TNF/TRAF4/MAPK3/PRMT1/ZC3H12A/STK25/PYCARD/CCR7/RELL2/SEMA4C/PBK/IL26/DUSP22/SPI1/WNT7A/RASSF2/AKT1/CD27/DUSP3/PINK1/RAPGEF1/IL1B/PPIA/MAP4K2/TRAF1/MAP3K4/MINK1
GOBP_CELLULAR_RESPONSE_TO_EXTERNAL_STIMULUS	GOBP_CELLULAR_RESPONSE_TO_EXTERNAL_STIMULUS	271	0.416123	1.43733	0.000806259	0.0296625	0.0256665	3369	tags=29%, list=20%, signal=23%	CDKN1A/SIK1/NR4A2/FOS/SREBF1/SESN2/SIPA1/GADD45A/NFKB1/UCP2/JUN/PTGER4/TNFSF14/XBP1/BCL2/MAPK3/ZC3H12A/PPP1R9B/STK24/NUDT1/TP53/AQP3/BAG3/USF2/WDR59/PICK1/MAP1LC3A/CD68/MAP2K4/AKT1/ARHGAP35/FOXO3/NFE2L2/IL1B/TXN2/PIEZO1/PIM1/SLC39A4/ATF3/DAG1/WDR45/UPP1/RRAGD/PRKAG1/CNN2/GOT1/SRF/TRIM24/ATP1A1/NPRL3/RRAGB/SLC2A1/SIK2/MAPK1/ULK1/RRP8/GSTP1/PHEX/ENG/SREBF2/RPTOR/NCOA1/GAS6/TFEB/GABARAPL1/ICAM1/FOXO…
GOBP_MONOCARBOXYLIC_ACID_CATABOLIC_PROCESS	GOBP_MONOCARBOXYLIC_ACID_CATABOLIC_PROCESS	121	0.498705	1.60875	0.000820768	0.0299487	0.0259141	2994	tags=31%, list=18%, signal=26%	SESN2/DCXR/ECI1/ACOT8/MCAT/GCDH/ABCD1/HSD17B10/TYSND1/AKT1/ACADVL/PEX7/PCCB/PGD/AKR1A1/DECR2/ECH1/AKT2/ETFB/ACOX3/ACAD10/PECR/NUDT7/FAAH/ECHS1/ACADS/ACAA1/CPT2/CRAT/PLA2G15/XYLB/PPARD/ABCD4/MLYCD/AUH/CRYL1/BDH2/ECHDC2
GOMF_MAP_KINASE_SCAFFOLD_ACTIVITY	GOMF_MAP_KINASE_SCAFFOLD_ACTIVITY	11	0.851758	1.76585	0.000831456	0.0299613	0.0259249	264	tags=18%, list=2%, signal=18%	MAP2K1/MAP2K2
GOBP_LEUKOCYTE_MIGRATION_INVOLVED_IN_INFLAMMATORY_RESPONSE	GOBP_LEUKOCYTE_MIGRATION_INVOLVED_IN_INFLAMMATORY_RESPONSE	16	0.766575	1.72925	0.00083802	0.0299613	0.0259249	1446	tags=44%, list=9%, signal=40%	S100A9/CCR6/NLRP3/S100A8/ADAM8/FUT7/ALOX5
GOBP_RESPONSE_TO_CHEMOKINE	GOBP_RESPONSE_TO_CHEMOKINE	73	0.559077	1.67294	0.000839773	0.0299613	0.0259249	1289	tags=22%, list=8%, signal=20%	DUSP1/XCL2/CCR9/CXCR5/CCR6/STK39/SH2B3/ZC3H12A/CCR7/CXCR4/CCL20/CCR4/CCR5/CCL3/CCR10/CXCR6
GOMF_CALMODULIN_BINDING	GOMF_CALMODULIN_BINDING	175	0.450554	1.50361	0.000838869	0.0299613	0.0259249	3182	tags=23%, list=19%, signal=19%	RGS16/MARCKSL1/MYO1D/RGS1/SNTA1/MAP6D1/MKNK2/VAMP2/MYO9B/ADCY3/KCNN4/ADD1/EDF1/MYO1F/AKT1/ORAI1/MYO1G/KCNQ1/PLA2G6/SNTB1/MAPKAPK3/CAMKK2/PPP3CA/MAPKAPK2/CNN2/IQGAP2/NRGN/MYO1C/CASK/CAMSAP2/PCNT/ATP2B4/ITPKC/MYH9/CAMK1D/PLCB3/GEM/SNTB2/MYH3/RGS2
GOBP_REGULATION_OF_B_CELL_ACTIVATION	GOBP_REGULATION_OF_B_CELL_ACTIVATION	112	0.4959	1.58837	0.00086587	0.0305528	0.0264368	1666	tags=23%, list=10%, signal=21%	CDKN1A/TBX21/TNFRSF4/TNFAIP3/TICAM1/TYROBP/TGFB1/ZFP36L2/XBP1/BCL2/ADA/CD81/STAT5B/TBC1D10C/EXOSC6/BCL6/HMGB3/CD38/PKN1/CD27/NFATC2/CLCF1/CARD11/CD74/ZFP36L1/TNIP2
GOBP_CELL_MATURATION	GOBP_CELL_MATURATION	137	0.471416	1.53612	0.000861239	0.0305528	0.0264368	2942	tags=19%, list=18%, signal=16%	CDKN1A/NR4A2/KLF2/CCR6/B4GALT5/BCL2/FAM210B/BFSP1/CCNB1/PICK1/G6PD/AKR1B1/CDC25B/SIRT2/RND1/ZBTB7A/CBFB/TYMS/RFX3/CABYR/HES1/NTN4/APP/TUSC2/PLD6/ERCC2
GOMF_MAP_KINASE_PHOSPHATASE_ACTIVITY	GOMF_MAP_KINASE_PHOSPHATASE_ACTIVITY	14	0.789069	1.73116	0.000895319	0.0310797	0.0268927	1996	tags=50%, list=12%, signal=44%	DUSP5/DUSP2/DUSP1/DUSP16/DUSP3/DUSP6/DUSP4
GOBP_CELLULAR_RESPONSE_TO_VASCULAR_ENDOTHELIAL_GROWTH_FACTOR_STIMULUS	GOBP_CELLULAR_RESPONSE_TO_VASCULAR_ENDOTHELIAL_GROWTH_FACTOR_STIMULUS	57	0.591599	1.7109	0.000894603	0.0310797	0.0268927	3122	tags=33%, list=19%, signal=27%	MIR27A/NR4A1/PRKD2/MAPK14/PIK3CD/MT1G/AKT1/HSPB1/MAP2K3/MIR27B/MAPKAPK2/MYO1C/ANXA1/RELA/VEGFB/CD63/ATP2B4/MIR199A1/NOTCH1
GOBP_PROTEIN_LOCALIZATION_TO_CELL_JUNCTION	GOBP_PROTEIN_LOCALIZATION_TO_CELL_JUNCTION	97	0.511682	1.61046	0.000893445	0.0310797	0.0268927	2298	tags=25%, list=14%, signal=21%	CLSTN1/LSR/TYROBP/HRAS/ZDHHC12/PRKCZ/DVL1/FLNA/CDK5/WNT7A/GRIPAP1/ARHGEF18/HSPB1/TJP2/LAMTOR2/ACTB/DAG1/CLSTN3/ZDHHC7/ACTG1/MAP1A/HEG1/TJP3/SCRIB
GOBP_B_CELL_ACTIVATION	GOBP_B_CELL_ACTIVATION	228	0.439741	1.49782	0.0009022	0.0311501	0.0269537	2700	tags=26%, list=16%, signal=22%	CDKN1A/BCL3/TBX21/TNFRSF4/TNFAIP3/TICAM1/TYROBP/TGFB1/CXCR5/LFNG/CCR6/ZFP36L2/XBP1/LYL1/BCL2/ADA/CD81/BAX/CMTM7/STAT5B/LGALS1/TP53/TBC1D10C/EXOSC6/BCL6/HMGB3/CD38/PKN1/PIK3CD/PRKCD/CD27/NFATC2/IRF2BP2/CLCF1/PRKCB/ST3GAL1/CARD11/CD74/ZBTB7A/ZFP36L1/TNIP2/LEF1/TCIRG1/KLF6/LRRC8A/IL10/IGLL5/BST2/ZAP70/CD79B/PIK3R1/TNFRSF13C/ERCC1/IL27RA/PTPRJ/PHB2/ABL1/ATP11C/PTPN6
GOMF_PEPTIDE_RECEPTOR_ACTIVITY	GOMF_PEPTIDE_RECEPTOR_ACTIVITY	117	0.49088	1.58022	0.00091344	0.0312027	0.0269992	2188	tags=18%, list=13%, signal=16%	OGFR/CCR9/GALR2/CXCR5/CCR6/RAMP1/CCR7/CXCR4/CCR4/CCR5/CCR10/SIGMAR1/CXCR6/F2R/KISS1R/GPR35/MC1R/NLRP6/FPR1/OPRL1/AGTRAP
GOBP_LEUKOCYTE_PROLIFERATION	GOBP_LEUKOCYTE_PROLIFERATION	276	0.416152	1.4413	0.000908768	0.0312027	0.0269992	2770	tags=27%, list=17%, signal=23%	CDKN1A/CEBPB/TNFRSF4/TNFAIP3/TICAM1/TYROBP/CCDC88B/TNFSF14/BCL2/MAPK3/CLU/SLC7A1/ADA/CD81/BAX/FLT3LG/CCND3/STAT5B/PYCARD/PRKCQ/RAC2/TMIGD2/PSMB10/TP53/ACE/NCK2/RASAL3/RIPK3/CD55/SPN/BCL6/CD38/PKN1/PRKCD/CORO1A/IL23A/PRDX2/TGFBR2/NFATC2/CLCF1/TNFRSF1B/IL23R/CARD11/ELF4/IL1B/LGALS3/NCSTN/CD74/CD151/LEF1/CD3E/AIF1/TCIRG1/IL5RA/IL12RB1/IL10/LST1/ANXA1/BST2/SCRIB/ZAP70/RPS3/HES1/TNFRSF13C/IL27RA/ZBTB7…
GOBP_POSITIVE_REGULATION_OF_VASCULATURE_DEVELOPMENT	GOBP_POSITIVE_REGULATION_OF_VASCULATURE_DEVELOPMENT	139	0.469514	1.53197	0.000925671	0.0314532	0.0272159	3933	tags=34%, list=24%, signal=26%	PRKD2/TNFSF12/C5AR1/RHOB/XBP1/BTG1/SMAD1/ZC3H12A/JMJD8/RRAS/CXCR4/TMIGD2/ZNF304/GRN/CTSH/THBS1/PIK3CD/TGFBR2/PRKCB/NFE2L2/IL1B/HSPB1/MIR1908/ADAM12/MIR27B/IL10/ADM2/C3AR1/RUNX1/VEGFB/TBXA2R/ABL1/ETS1/ENG/MIR199A1/ITGAX/SIRT6/CYP1B1/PAK4/RAMP2/ITGB2/MIR21/STIM1/KLF4/SPHK1/PIK3R6/PDCL3
GOBP_NEGATIVE_REGULATION_OF_NEURON_DEATH	GOBP_NEGATIVE_REGULATION_OF_NEURON_DEATH	168	0.456296	1.51926	0.000930791	0.0314607	0.0272224	1308	tags=15%, list=8%, signal=14%	CEBPB/NR4A2/ATP13A2/BTG2/NR4A3/NENF/HRAS/C5AR1/ARRB2/BCL2/DNAJC5/BAX/WNT1/ADAM8/GRN/HTRA2/PM20D1/PIN1/CDK5/CORO1A/MAP2K4/AKT1/PINK1/CLCF1/TNFRSF1B/F2R
GOBP_NEUTROPHIL_MIGRATION	GOBP_NEUTROPHIL_MIGRATION	99	0.513168	1.61698	0.000936836	0.0314993	0.0272557	3435	tags=37%, list=21%, signal=30%	S100A12/S100A9/XCL2/PDE4B/C5AR1/BSG/PIP5K1C/PREX1/CCR7/CCL20/RAC2/S100A8/ADAM8/FUT7/RHOG/CCL3/FCER1G/PIK3CD/IL23A/CKLF/LGALS3/CD74/PPIA/RHOH/WDR1/VAV1/C3AR1/CXCL10/MPP1/CAMK1D/NOD2/PPBP/MYD88/CD99L2/RAC1/EDN1/CCL5
GOMF_DNA_BINDING_TRANSCRIPTION_ACTIVATOR_ACTIVITY	GOMF_DNA_BINDING_TRANSCRIPTION_ACTIVATOR_ACTIVITY	377	0.396011	1.39369	0.000958519	0.0320605	0.0277413	2501	tags=19%, list=15%, signal=16%	CEBPB/NR4A2/FOS/FOSL2/SREBF1/CEBPD/CSRNP1/NR4A1/NFKB2/JUNB/NR4A3/TFDP1/RFXAP/NFKB1/SMARCD3/ZNF784/JUN/JUND/FOSB/DBP/MAFF/SMAD1/STAT5B/ZNF48/RXRB/E2F4/DDIT3/TP53/IRF3/SMAD3/RFXANK/PRDM4/CSRNP2/FOXO4/CREB3L4/SPI1/MLXIP/NFATC2/FOXO3/IRF5/NFE2L2/ELF4/HLF/NFYC/ATF3/MEF2D/TFE3/KLF13/ZSCAN21/LEF1/TFCP2/ATF5/E4F1/CEBPE/ZNF580/KLF6/NR1H2/SRF/RFX5/ATMIN/ZNF268/MAFG/MAFB/SMARCD2/RELA/FOXD2/RUNX1/NFATC1/ZBTB…
GOBP_POSITIVE_REGULATION_OF_ERK1_AND_ERK2_CASCADE	GOBP_POSITIVE_REGULATION_OF_ERK1_AND_ERK2_CASCADE	160	0.469401	1.55503	0.000983063	0.032711	0.0283043	3243	tags=24%, list=20%, signal=19%	MAP2K1/MIR27A/PRKD2/XCL2/TGFB1/HRAS/C5AR1/TNF/ARRB2/MAPK3/GNAI2/PYCARD/CCR7/CCL20/PRKCZ/IL26/CCL3/MAP2K7/F2R/ABCA7/RAPGEF1/ATP6AP1/CD74/MIR27B/GLIPR2/MIR221/TPBG/APP/PHB2/ABL1/LGALS9/GAS6/ICAM1/NQO2/NOD2/NOTCH1/CD4/NOD1
GOBP_RESPONSE_TO_CATECHOLAMINE	GOBP_RESPONSE_TO_CATECHOLAMINE	82	0.537319	1.64834	0.000998922	0.0330674	0.0286127	2625	tags=24%, list=16%, signal=21%	GNA15/NR4A3/PDE4B/DNM2/KLF16/ARRB2/MAPK3/FLNA/SIRT2/NCSTN/KCNQ1/ID1/GNB1/DTNBP1/GNAS/APP/MAPK1/ATP2B4/ABL1/SLC9A3R1
GOBP_RECOMBINATIONAL_REPAIR	GOBP_RECOMBINATIONAL_REPAIR	117	-0.410656	-1.55028	0.00102993	0.0339189	0.0293494	2129	tags=32%, list=13%, signal=28%	RAD51C/HUS1/YY1/ZNF365/RAD52/PARPBP/RAD51AP1/BRCA2/RMI1/NIPBL/NUCKS1/PSMD14/SMCHD1/ACTR2/KLHL15/RIF1/RFWD3/ERCC4/ATM/MORF4L1/RNF138/WDR48/MCM9/SMC5/PALB2/MMS22L/UBE2N/NBN/RECQL/ARID2/WRN/SMC6/FANCM/CDC7/HELQ/HELB/FANCB/FIGNL1
GOBP_T_CELL_LINEAGE_COMMITMENT	GOBP_T_CELL_LINEAGE_COMMITMENT	26	0.690242	1.7187	0.00104088	0.0341048	0.0295103	2024	tags=38%, list=12%, signal=34%	TBX21/BCL2/TP53/IL6R/SPN/IL23A/TOX/IL23R/SLAMF6/IL12RB1
GOBP_NEGATIVE_REGULATION_OF_GROWTH	GOBP_NEGATIVE_REGULATION_OF_GROWTH	219	0.440507	1.49575	0.00108084	0.0352343	0.0304876	3476	tags=27%, list=21%, signal=22%	CDKN1A/SESN2/SIPA1/CTDP1/TGFB1/SERTAD3/DNAJB2/BTG1/BCL2/SEMA4B/PI16/SEMA4D/PPP1R9B/CCDC85B/SEMA4C/TP53/SMAD3/MT1H/CDKN2D/STK11/BCL6/ADRB2/CDK5/MT1G/HSPA1B/NDUFA13/TGFBR2/G6PD/ENO1/NME6/ING5/PPP2R1A/SMARCA4/MAPK11/NDUFS3/SPHK2/ARHGAP4/BST2/EI24/FHL1/MT2A/SCGB3A1/PPARD/PTPRJ/CDK5R1/MUL1/HYAL2/TRIM46/MIR199A1/PTK6/SEMA4A/VGLL4/ST20/NOTCH1/RGS2/PML/PAK1/PSRC1/ING4/MT1X
GOBP_BONE_DEVELOPMENT	GOBP_BONE_DEVELOPMENT	162	0.461941	1.53497	0.00109865	0.0356338	0.0308333	2937	tags=21%, list=18%, signal=17%	KAT2A/TYROBP/RARG/PTGER4/THBS3/VKORC1/SEMA4D/ANXA6/TMEM119/SMAD1/NAB1/SH2B3/GPR68/WNT1/TULP3/TP53/LTBP3/ANXA2/TGFBR2/PEX7/SKI/ATP6AP1/MEF2D/GLG1/INPPL1/SRF/GNAS/XYLT1/PTPN6/PHEX/CHSY1/SLC38A10/ENG/RPL13
GOBP_T_CELL_SELECTION	GOBP_T_CELL_SELECTION	47	0.61346	1.72274	0.00111628	0.035797	0.0309745	2330	tags=36%, list=14%, signal=31%	TBX21/BCL2/CCR7/IL6R/SPN/STK11/IL23A/TOX/IL23R/CARD11/CD74/SLAMF6/CD3E/SRF/IL12RB1/CD3D/ZAP70
GOBP_REGULATION_OF_CELL_SUBSTRATE_ADHESION	GOBP_REGULATION_OF_CELL_SUBSTRATE_ADHESION	189	0.449364	1.50671	0.0011204	0.035797	0.0309745	2992	tags=26%, list=18%, signal=22%	PTPRA/MYADM/CRK/DNM2/LDB1/BCL2/WNT1/PREX1/RRAS/CDK6/CCR7/RELL2/RAC2/PRKCZ/LGALS1/SMAD3/FLNA/BCL6/UNC13D/DUSP22/ILK/THBS1/FMN1/DUSP3/LIMS2/SKAP1/S100A10/DAG1/CD3E/MINK1/ACTG1/RCC2/TRIOBP/TESK1/CALR/CASK/EMILIN1/MAP4K4/PIK3R1/PPM1F/PTPRJ/ARL2/ABL1/BCAS3/ACTN4/TBCD/RSU1/P4HB/SPOCK2/ITGA6
GOBP_RESPONSE_TO_METAL_ION	GOBP_RESPONSE_TO_METAL_ION	315	0.406556	1.415	0.00111647	0.035797	0.0309745	3476	tags=25%, list=21%, signal=20%	FOS/DUSP1/ATP13A2/CRIP1/JUNB/JUN/JUND/BSG/GDI1/CPNE1/FOSB/BCL2/MAPK3/RASGRP2/CD14/NUDT1/S100A8/AQP3/MT1H/CALM3/PPP1CA/CCNB1/ADD1/MMP9/CPNE2/NDRG1/TSPO/MAP1LC3A/TNNC1/THBS1/MT1G/KHK/AKT1/G6PD/SLC25A23/NFE2L2/LONP1/PGAM2/GSN/NCSTN/CPNE7/AHCYL1/CYB5A/PPP3CA/MCOLN1/TCIRG1/DAXX/ANXA11/CDK4/D2HGDH/ENDOG/GOT1/CALR/PPP5C/CUTA/ALOX5AP/MT2A/DNMT3A/MNAT1/ERCC1/HSF1/SLC39A13/APP/MAPK1/CAT/ACER1/SLC12A2/RASA4…
GOMF_AMINO_ACID_SODIUM_SYMPORTER_ACTIVITY	GOMF_AMINO_ACID_SODIUM_SYMPORTER_ACTIVITY	12	-0.828029	-1.89901	0.00116261	0.0369617	0.0319823	440	tags=42%, list=3%, signal=41%	SLC6A12/SLC6A20/SLC6A9/SLC38A1/SLC38A2
GOBP_RESPONSE_TO_EPIDERMAL_GROWTH_FACTOR	GOBP_RESPONSE_TO_EPIDERMAL_GROWTH_FACTOR	41	0.639224	1.75271	0.00118575	0.0369694	0.031989	2742	tags=39%, list=17%, signal=33%	ZFP36/ZFP36L2/MAPK3/PPP1R9B/STAT5B/DUSP22/AKT1/DUSP3/ZFP36L1/SYAP1/ID1/MCM7/MAPK1/CAD/INPP5K/GSTP1
GOBP_CHONDROITIN_SULFATE_PROTEOGLYCAN_METABOLIC_PROCESS	GOBP_CHONDROITIN_SULFATE_PROTEOGLYCAN_METABOLIC_PROCESS	38	0.627191	1.68471	0.00116967	0.0369694	0.031989	3239	tags=34%, list=20%, signal=28%	CHST11/B3GALT6/B3GAT3/CHPF/CHPF2/ARSB/VCAN/XYLT1/CHSY1/XYLT2/UGDH/SPOCK2/CHST12
GOBP_NEGATIVE_REGULATION_OF_PROTEIN_BINDING	GOBP_NEGATIVE_REGULATION_OF_PROTEIN_BINDING	84	0.527395	1.62365	0.00117771	0.0369694	0.031989	2094	tags=29%, list=13%, signal=25%	CDKN1A/STUB1/ATP2A3/DNAJB2/RUVBL2/ARRB2/MAPK3/BAX/ACE/DVL1/CTNNBIP1/PPP1CA/PIN1/PEX14/ADRB2/PRKCD/AKT1/TMC8/ACTB/LEF1/MIR27B/ID1/DTNBP1/IL10
GOBP_MUSCLE_CELL_DIFFERENTIATION	GOBP_MUSCLE_CELL_DIFFERENTIATION	299	0.408229	1.41483	0.00118588	0.0369694	0.031989	3769	tags=24%, list=23%, signal=19%	SIK1/RBM38/KAT2A/CTDP1/TGFB1/SMARCD3/ACVR1/XBP1/ARRB2/BCL2/CDK9/PI16/MAPK14/CD81/TMEM119/MIR590/WNT1/TMEM204/SEMA4C/CCNB1/PIN1/FOXO4/GPX1/MAP2K4/AKT1/KDM6B/G6PD/NFATC2/PLD3/CBY1/SKI/BCL9/TARBP2/PPP3CA/ADAM12/WDR1/MAPK11/EHD1/PLEKHO1/SRF/CALR/CSRP1/MIR221/DYRK1B/SCGB3A1/HES1/IL4R/NFATC1/CXCL10/PTBP1/ABL1/MYH9/TANC1/FLII/ENG/MIR199A1/MYH3/ANKRD17/NOTCH1/RGS2/CD53/PAK1/MAMSTR/EDN1/TCF3/BIN1/FLOT1/RA…
GOBP_ACUTE_INFLAMMATORY_RESPONSE	GOBP_ACUTE_INFLAMMATORY_RESPONSE	92	0.517049	1.61372	0.00120382	0.0372163	0.0322026	1424	tags=16%, list=9%, signal=15%	CEBPB/OSM/ACVR1/TNF/IL22/NLRP3/CCR7/S100A8/ADAM8/IL6R/CTNNBIP1/FUT7/B4GALT1/IL1B/RHBDD3
GOBP_DEVELOPMENTAL_MATURATION	GOBP_DEVELOPMENTAL_MATURATION	225	0.431723	1.468	0.00120539	0.0372163	0.0322026	2581	tags=18%, list=16%, signal=16%	CDKN1A/NR4A2/KLF2/CLSTN1/AP3D1/CCR6/RAB3A/B4GALT5/THBS3/LYL1/BCL2/SEMA4D/BAIAP3/WNT1/FAM210B/DDIT3/BFSP1/BLOC1S3/CCNB1/PICK1/G6PD/AKR1B1/CDC25B/SIRT2/RND1/ZBTB7A/DAG1/AP1M1/CBFB/S1PR1/TYMS/RFX3/SNAPIN/CABYR/HES1/RERE/NTN4/CD63/CDK5R1/APP/XYLT1
GOBP_BONE_RESORPTION	GOBP_BONE_RESORPTION	58	0.573855	1.66253	0.00125669	0.0386148	0.0334127	2090	tags=28%, list=13%, signal=24%	TNFAIP3/GPR137B/NCDN/TMEM119/RAC2/ADAM8/LTBP3/DEF8/ADRB2/CD38/CSK/ATP6AP1/ACP5/TCIRG1/S1PR1/GPR137
GOBP_OLIGODENDROCYTE_DEVELOPMENT	GOBP_OLIGODENDROCYTE_DEVELOPMENT	35	0.647232	1.72127	0.00127817	0.0390876	0.0338218	3290	tags=49%, list=20%, signal=39%	B4GALT5/CLU/TPPP/HDAC10/ABCA2/GSN/NCSTN/EIF2B5/CNTNAP1/NSUN5/EIF2B4/EIF2B2/PRDM8/EIF2B3/GSTP1/ERCC2/LYN
GOBP_REGULATION_OF_NEURON_PROJECTION_DEVELOPMENT	GOBP_REGULATION_OF_NEURON_PROJECTION_DEVELOPMENT	384	0.397767	1.40028	0.00128489	0.0391068	0.0338384	3328	tags=22%, list=20%, signal=18%	MAP2K1/S100A9/MYLIP/YWHAH/GFI1/CRK/CBFA2T2/FBXO31/PTPN9/GDI1/NME1/SEMA4B/ACAP3/SEMA4D/LTK/SF3A2/PREX1/STK25/ARHGDIA/STK24/CFL1/SEMA4C/TNIK/LGALS1/PLXND1/SKIL/GRN/DVL1/DYNLT1/DBNL/FLNA/STK11/CDK5/CD38/WNT7A/PPP2R5B/AKT1/ARHGAP35/EPHA4/DGUOK/TOX/NIN/NFE2L2/RAPGEF1/ENC1/GORASP1/PPP3CA/METRN/ID1/NME2/DHX36/SRF/ARSB/CAMSAP2/ARHGAP4/LZTS1/MIR221/CARM1/SNAPIN/MBOAT1/FKBP4/CDK5R1/TWF2/DDX56/TRIM46/PACSIN…
GOBP_POSITIVE_REGULATION_OF_T_CELL_RECEPTOR_SIGNALING_PATHWAY	GOBP_POSITIVE_REGULATION_OF_T_CELL_RECEPTOR_SIGNALING_PATHWAY	11	0.837743	1.7368	0.00131707	0.0397803	0.0344211	2381	tags=82%, list=14%, signal=70%	PRKD2/ADA/CD81/CCR7/KCNN4/CARD11/RELA/RPS3/LCK
GOBP_POSITIVE_REGULATION_OF_PRODUCTION_OF_MIRNAS_INVOLVED_IN_GENE_SILENCING_BY_MIRNA	GOBP_POSITIVE_REGULATION_OF_PRODUCTION_OF_MIRNAS_INVOLVED_IN_GENE_SILENCING_BY_MIRNA	11	0.836659	1.73455	0.00133179	0.0397803	0.0344211	798	tags=36%, list=5%, signal=35%	MAP2K1/TGFB1/MAP2K2/TP53
GOBP_FATTY_ACID_BETA_OXIDATION	GOBP_FATTY_ACID_BETA_OXIDATION	72	0.557748	1.66751	0.00133068	0.0397803	0.0344211	2994	tags=39%, list=18%, signal=32%	SESN2/ECI1/ACOT8/MCAT/GCDH/ABCD1/HSD17B10/TYSND1/AKT1/ACADVL/PEX7/DECR2/ECH1/AKT2/ETFB/ACOX3/ACAD10/ECHS1/ACADS/ACAA1/CPT2/CRAT/PPARD/ABCD4/MLYCD/AUH/BDH2/ECHDC2
GOMF_CYTOKINE_BINDING	GOMF_CYTOKINE_BINDING	120	0.492651	1.5865	0.00131942	0.0397803	0.0344211	3486	tags=34%, list=21%, signal=27%	ZFP36/CCR9/ACVR1/CXCR5/CCR6/CCR7/CXCR4/CCR4/PLP2/IL6R/LTBP3/CCR5/IL2RG/THBS1/CCR10/TGFBR2/TMC8/CXCR6/TNFRSF1B/IL23R/HAX1/CD74/IL5RA/IL12RB1/IL27RA/HYAL2/IL11RA/GREM2/VASN/ENG/TRAF2/IL13RA1/CXCR3/TNFRSF14/CD4/PARK7/IL12RB2/CCR2/IL2RB/ITGA4/IL17F
GOBP_CARDIAC_MUSCLE_TISSUE_DEVELOPMENT	GOBP_CARDIAC_MUSCLE_TISSUE_DEVELOPMENT	168	0.451117	1.50201	0.00137335	0.0408317	0.0353309	3428	tags=23%, list=21%, signal=18%	SIK1/KAT2A/CTDP1/SMAD7/TGFB1/ACVR1/ARRB2/PI16/MAPK14/MIR590/SMAD1/CCNB1/PIN1/TNNC1/MAP2K4/TGFBR2/KDM6B/G6PD/CHD7/CBY1/PIM1/MAPK11/S1PR1/SRF/CALR/HEG1/NPRL3/RUNX1/MAPK1/ENG/MIR199A1/VGLL4/NOTCH1/RGS2/PAK1/SIRT6/GLI1/EDN1
GOBP_POSITIVE_REGULATION_OF_P38MAPK_CASCADE	GOBP_POSITIVE_REGULATION_OF_P38MAPK_CASCADE	26	0.681294	1.69641	0.00138554	0.0410043	0.0354803	1950	tags=42%, list=12%, signal=37%	GADD45G/GADD45B/GADD45A/PRMT1/ZC3H12A/RELL2/SPI1/IL1B/MAP3K4/MINK1/MAP3K3
GOBP_PROTEOGLYCAN_METABOLIC_PROCESS	GOBP_PROTEOGLYCAN_METABOLIC_PROCESS	76	0.535794	1.61684	0.00140286	0.0413264	0.035759	3405	tags=32%, list=21%, signal=25%	CHST11/B3GALT6/B3GAT3/CHPF/CHST14/HS6ST1/CHPF2/NDST2/ARSB/SGSH/VCAN/PPARD/XYLT1/B4GALT7/CHSY1/XYLT2/UGDH/CANT1/SPOCK2/UST/FAM20B/CHST12/CHST10/EXT1
GOBP_ANGIOGENESIS_INVOLVED_IN_WOUND_HEALING	GOBP_ANGIOGENESIS_INVOLVED_IN_WOUND_HEALING	25	0.696459	1.71407	0.00144882	0.0420324	0.0363699	2996	tags=44%, list=18%, signal=36%	TNFAIP3/TNF/XBP1/CXCR4/GPX1/B4GALT1/ALOX5/DAG1/SRF/ETS1/SLC12A2
GOBP_POSITIVE_REGULATION_OF_INFLAMMATORY_RESPONSE	GOBP_POSITIVE_REGULATION_OF_INFLAMMATORY_RESPONSE	112	0.488424	1.56442	0.00144456	0.0420324	0.0363699	1391	tags=20%, list=8%, signal=18%	CEBPB/OSM/S100A12/S100A9/TNF/PTGER4/NFKBIA/CD81/TRADD/TNIP1/ABCC1/STAT5B/CCR7/LTA/S100A8/GPSM3/ADAM8/GRN/CCL3/IL23A/IFI35/IL1B
GOBP_ADENYLATE_CYCLASE_MODULATING_G_PROTEIN_COUPLED_RECEPTOR_SIGNALING_PATHWAY	GOBP_ADENYLATE_CYCLASE_MODULATING_G_PROTEIN_COUPLED_RECEPTOR_SIGNALING_PATHWAY	174	0.447332	1.49288	0.00144331	0.0420324	0.0363699	3749	tags=22%, list=23%, signal=18%	S1PR4/GNA15/GALR2/PDE4B/RGS1/PTGER4/GNAI2/RAMP1/ADCY3/LPAR2/FLNA/ADRB2/S1PR2/PDE4D/MC1R/S1PR1/NME2/GNB1/GABBR1/GNAT2/GNAS/FPR1/OPRL1/ADM2/CXCL10/INSL3/TBXA2R/ATP2B4/SLC9A3R1/ARRDC3/FFAR3/GNA12/RGS2/VIPR1/EDN1/GHRH/RAMP2/PSAP/GSK3A
GOBP_RNA_SPLICING	GOBP_RNA_SPLICING	414	-0.301034	-1.30954	0.001453	0.0420324	0.0363699	3092	tags=36%, list=19%, signal=30%	ZCCHC8/THOC7/SON/PRPF19/SUPT6H/RBMX2/HNRNPU/HNRNPA1L2/HABP4/CDC5L/PRPF3/HNRNPH3/MFAP1/THOC5/PRPF38A/RPS13/METTL3/LSM5/LSM3/PNN/SNW1/GEMIN5/ZBTB8OS/RBM41/SRSF3/SNRNP200/SRSF6/SAP18/RBM22/ECD/SF3A3/SMNDC1/GTF2F2/RBM17/LUC7L2/PSIP1/ACIN1/SRSF4/GEMIN4/NONO/SRPK1/CLK4/WTAP/PRPF18/TIA1/GEMIN6/SNRPF/DDX5/SNRPB2/DDX47/RBM39/CPSF3/NCBP2/METTL14/PTBP3/PPP2CA/SNRPA1/SNIP1/SYNCRIP/SETX/FRG1/SMU1/SNRPG/FXR1/M…
GOBP_PRI_MIRNA_TRANSCRIPTION_BY_RNA_POLYMERASE_II	GOBP_PRI_MIRNA_TRANSCRIPTION_BY_RNA_POLYMERASE_II	51	0.59548	1.69552	0.00146516	0.0421941	0.0365098	4340	tags=45%, list=26%, signal=33%	FOS/TGFB1/JUN/TNF/SMAD1/TP53/SMAD3/SPI1/FOXO3/SMARCA4/SRF/IL10/RELA/PPARD/ETS1/SREBF2/EGR1/PDGFB/KLF4/KLF5/HDAC4/POU5F1/FOSL1
GOBP_REGULATION_OF_CARDIAC_MUSCLE_CELL_DIFFERENTIATION	GOBP_REGULATION_OF_CARDIAC_MUSCLE_CELL_DIFFERENTIATION	16	0.75343	1.6996	0.00148278	0.0423558	0.0366497	540	tags=25%, list=3%, signal=24%	KAT2A/TGFB1/ARRB2/MIR590
GOBP_REGULATION_OF_MONONUCLEAR_CELL_MIGRATION	GOBP_REGULATION_OF_MONONUCLEAR_CELL_MIGRATION	98	0.508928	1.60352	0.00149056	0.0423558	0.0366497	3435	tags=37%, list=21%, signal=29%	DUSP1/XCL2/TMEM102/CRK/CCR6/C5AR1/TNF/STK39/MAPK3/PYCARD/CCR7/CCL20/ADAM8/RIPK3/SPN/CCL3/STK10/THBS1/AKT1/LGALS3/AIF1/CALR/C3AR1/IL27RA/CXCL10/APP/MAPK1/LGALS9/GAS6/TNFRSF14/FADD/CD99L2/LYN/CCR2/ITGA4/CCL5
GOBP_GASTRULATION	GOBP_GASTRULATION	157	0.450204	1.48515	0.00148958	0.0423558	0.0366497	2218	tags=16%, list=13%, signal=14%	DUSP5/DUSP2/DUSP1/NR4A3/MIR150/MYADM/ACVR1/MAPK7/LDB1/SMAD1/ARFRP1/TGIF2/TP53/SMAD3/DVL1/MMP9/TGFBR2/KDM6B/DAG1/LEF1/DUSP4/SRF/IL10/EOMES/MIR221
GOBP_CATECHOL_CONTAINING_COMPOUND_BIOSYNTHETIC_PROCESS	GOBP_CATECHOL_CONTAINING_COMPOUND_BIOSYNTHETIC_PROCESS	17	0.752931	1.72233	0.00149753	0.0423663	0.0366588	753	tags=12%, list=5%, signal=11%	NR4A2/GCH1
GOBP_POSITIVE_REGULATION_OF_B_CELL_PROLIFERATION	GOBP_POSITIVE_REGULATION_OF_B_CELL_PROLIFERATION	39	0.630229	1.70687	0.00151987	0.0427742	0.0370117	1489	tags=31%, list=9%, signal=28%	CDKN1A/TNFRSF4/TICAM1/BCL2/ADA/CD81/BCL6/CD38/NFATC2/CLCF1/CARD11/CD74
GOBP_CARDIAC_MUSCLE_CELL_DIFFERENTIATION	GOBP_CARDIAC_MUSCLE_CELL_DIFFERENTIATION	93	0.515859	1.61296	0.00152963	0.0427742	0.0370117	1337	tags=15%, list=8%, signal=14%	SIK1/KAT2A/CTDP1/TGFB1/ACVR1/ARRB2/PI16/MIR590/CCNB1/PIN1/MAP2K4/KDM6B/G6PD/CBY1
GOBP_MYELOID_LEUKOCYTE_MIGRATION	GOBP_MYELOID_LEUKOCYTE_MIGRATION	182	0.436887	1.46022	0.00153193	0.0427742	0.0370117	3435	tags=30%, list=21%, signal=24%	S100A12/DUSP1/S100A9/XCL2/PDE4B/C5AR1/BSG/PTGER4/PIP5K1C/MAPK3/CD81/PREX1/STAT5B/CCR7/CCL20/RAC2/S100A8/ADAM8/IL6R/FUT7/RHOG/CCL3/FCER1G/THBS1/PIK3CD/IL23A/CKLF/LGALS3/IL17RC/CD74/PPIA/RHOH/WDR1/AIF1/EMILIN1/ANXA1/VAV1/C3AR1/VEGFB/CXCL10/MAPK1/RPS19/MPP1/CAMK1D/NOD2/PPBP/MYD88/CD99L2/RIN3/LYN/CCR2/RAC1/EDN1/CCL5
GOBP_LEUKOCYTE_AGGREGATION	GOBP_LEUKOCYTE_AGGREGATION	13	0.813451	1.76318	0.00154277	0.0428904	0.0371123	1391	tags=54%, list=8%, signal=49%	S100A9/NR4A3/SEMA4D/RAC2/S100A8/STK10/IL1B
GOBP_REGULATION_OF_OSTEOBLAST_DIFFERENTIATION	GOBP_REGULATION_OF_OSTEOBLAST_DIFFERENTIATION	104	0.494747	1.56928	0.00157244	0.0433399	0.0375013	1785	tags=20%, list=11%, signal=18%	CEBPB/MIR27A/MEN1/ACVR1/JUND/TNF/SEMA4D/TMEM119/SMAD1/CDK6/SMAD3/IL6R/CTNNBIP1/HDAC7/RASSF2/TOB1/SKI/ATP6AP1/IFITM1/BAMBI/TCIRG1
GOBP_CALCIUM_ION_TRANSPORT	GOBP_CALCIUM_ION_TRANSPORT	349	0.395455	1.38692	0.00157056	0.0433399	0.0375013	3926	tags=25%, list=24%, signal=19%	ORAI3/ATP2A3/PDE4B/ARRB2/BCL2/P2RX5/ORAI2/DIAPH1/GNAI2/ANXA6/RAMP1/BAX/AHNAK/CCR7/CXCR4/DDIT3/KCNN4/CALM3/ANXA2/CCR5/FASLG/CCL3/TSPO/CDK5/CORO1A/ORAI1/G6PD/CHD7/PRKCB/SLC25A23/F2R/LGALS3/LIME1/CACNA2D2/PPP3CA/MCOLN1/IL16/PDE4D/STOML2/GPR35/SLC3A2/SPHK2/HSPA2/LILRA5/LCK/CXCL10/CDH23/ATP2B4/PHB2/ABL1/INPP5K/PTPN6/NOL3/KCNE3/SPG7/GAS6/GEM/ICAM1/RASA3/MICU1/TRPV2/MIR328/ITPR3/TMEM165/BAK1/CD4/ATP2C1/…
GOCC_VESICLE_LUMEN	GOCC_VESICLE_LUMEN	289	0.412059	1.42742	0.00158606	0.0435286	0.0376645	3059	tags=29%, list=19%, signal=24%	S100A12/PTGES2/S100A9/NFKB1/TGFB1/S100P/FAM3C/TRAPPC1/CLU/IMPDH1/MAPK14/ADA/GSDMD/PYCARD/VAT1/POMC/S100A11/S100A8/TOLLIP/GRN/DYNLT1/DBNL/CTSH/CFD/UNC13D/ANXA2/FASLG/OSTF1/THBS1/PRKCD/MVP/MAGED2/ARHGAP9/PDXK/GSN/PSMA5/ALOX5/ACTR1B/CYB5R3/SRGN/GMFG/PPIA/CTSD/TMSB4X/CPPED1/TEX264/APRT/CNN2/EEF2/NME2/LGALS3BP/CFP/FERMT3/ARSB/FCN1/ACAA1/PRDX6/PYGB/RNASET2/QSOX1/VEGFB/IMPDH2/PFKL/ALDOC/APP/MAPK1/GHDC/T…
GOBP_TUMOR_NECROSIS_FACTOR_SUPERFAMILY_CYTOKINE_PRODUCTION	GOBP_TUMOR_NECROSIS_FACTOR_SUPERFAMILY_CYTOKINE_PRODUCTION	139	0.459397	1.49896	0.00159311	0.043536	0.037671	3309	tags=30%, list=20%, signal=24%	BCL3/ZFP36/CYBA/TNFAIP3/TICAM1/TYROBP/RARA/ARRB2/CLU/ZC3H12A/PYCARD/POMC/CD14/NFKBIL1/ADAM8/SPN/CCL3/TSPO/THBS1/IL23A/HSPB1/MIR27B/MAPKAPK2/MC1R/SPHK2/IL10/LILRA5/PIK3R1/IL27RA/PTPRJ/APP/PTPN6/GSTP1/LGALS9/GAS6/NOD2/MAVS/FADD/NLRC3/MYD88/NOD1/CCR2
GOBP_LIPID_OXIDATION	GOBP_LIPID_OXIDATION	105	0.491083	1.5606	0.00160483	0.0435991	0.0377255	2994	tags=31%, list=18%, signal=26%	SESN2/NR4A3/ECI1/MAPK14/ACOT8/MCAT/GCDH/ABCD1/HSD17B10/TYSND1/AKT1/ACADVL/PEX7/ALOX5/DECR2/ECH1/AKT2/ETFB/ACOX3/ACAD10/PECR/FABP3/ECHS1/ACADS/ACAA1/CPT2/CRAT/PPARD/ABCD4/MLYCD/AUH/BDH2/ECHDC2
GOBP_POSITIVE_REGULATION_OF_CELLULAR_PROTEIN_LOCALIZATION	GOBP_POSITIVE_REGULATION_OF_CELLULAR_PROTEIN_LOCALIZATION	270	0.414473	1.42971	0.001609	0.0435991	0.0377255	2830	tags=26%, list=17%, signal=22%	SESN2/RNF31/GPR137B/TFDP1/TYROBP/YWHAH/TGFB1/HRAS/ZDHHC8/TNF/PTPN9/MEPCE/TRIM28/PIK3R2/TP53BP2/BCL2/CDT1/MAPK14/CD81/ZC3H12A/PPP1R9B/CROCC/LIF/TRAPPC12/PARD6A/RAC2/TP53/SMAD3/HTRA2/BAG3/FLNA/RHOG/STK11/CDK5/PRKCD/AKT1/USP36/PINK1/TRIM8/ABCA7/NUTF2/NMT1/LGALS3/CENPQ/BAP1/AKT2/FIS1/UBE2J2/GPD1L/CLN3/TESK1/VPS28/MYO1C/HCLS1/BBC3/MAP1A/MCRS1/STX4/PIK3R1/EZR/E2F1/CDK5R1/CLIP3/MAPK1/ATP2B4/HYAL2/SQSTM1…
GOBP_SKELETAL_SYSTEM_MORPHOGENESIS	GOBP_SKELETAL_SYSTEM_MORPHOGENESIS	171	0.452782	1.50683	0.00162076	0.0437333	0.0378416	1693	tags=14%, list=10%, signal=13%	CHST11/CSRNP1/RARG/FGFR1/THBS3/THRA/FUZ/ANXA6/MAPK14/TMEM119/NAB1/EIF4A3/TULP3/SMAD3/LTBP3/WNT7A/FMN1/MTHFD1L/TGFBR2/PEX7/SKI/MEF2D/GLG1/INPPL1
GOMF_SH3_DOMAIN_BINDING	GOMF_SH3_DOMAIN_BINDING	123	0.48204	1.55539	0.00168027	0.0449613	0.0389042	3643	tags=37%, list=22%, signal=29%	CYBA/REPS1/CRK/DNM2/KHDRBS1/TP53BP2/WAS/SH3GL1/RUFY1/SH3BP5/ARHGAP1/GPX1/OSTF1/SH2D2A/FMN1/RAPGEF1/SKAP1/INPPL1/ADAM12/CD3E/ADAM19/HCLS1/VASP/CNTNAP1/CABYR/HIP1R/CRB3/ABL1/PTPN6/RAD9A/EVL/ABI3/ELMO3/DENND1A/AFAP1L2/PAK3/CASP9/SH3BP2/NCF1/ELMO2/LYN/ERRFI1/MICAL1/UVRAG/SH3BP1
GOBP_MAINTENANCE_OF_LOCATION_IN_CELL	GOBP_MAINTENANCE_OF_LOCATION_IN_CELL	186	0.440111	1.47686	0.00168007	0.0449613	0.0389042	3537	tags=29%, list=21%, signal=23%	BCL3/CHCHD10/SUN2/S100A9/AP3D1/DIAPH1/ANXA6/BAX/CCR7/S100A8/DDIT3/CALM3/CCR5/FASLG/CCL3/TSPO/CDK5/CORO1A/AKT1/PINK1/CHD7/SLC25A23/F2R/GSN/FTH1/LIME1/SRGN/MCOLN1/TMSB4X/PDE4D/TMSB10/CALR/GAA/TXN/LCK/CXCL10/TWF2/ARL2/ABL1/PTPN6/NOL3/FTL/RER1/RASA3/KDELR1/ITPR3/CD4/PARK7/LYN/PML/OS9/PRKACA/CHERP/UBASH3B
GOBP_REGULATION_OF_STEROID_METABOLIC_PROCESS	GOBP_REGULATION_OF_STEROID_METABOLIC_PROCESS	102	0.502018	1.5897	0.00171655	0.04556	0.0394222	3129	tags=32%, list=19%, signal=26%	STUB1/MIR27A/SREBF1/NFKB1/PANK2/GFI1/TNF/RORC/STAT5B/PMVK/TSPO/ACADVL/ABCA2/NR1D1/NFYC/LAMTOR1/ABCG1/H6PD/TM7SF2/DGKQ/MIR27B/FDPS/ATP1A1/MVD/SQLE/DHCR7/SEC14L2/LDLRAP1/SREBF2/SNAI1/LPCAT3/EGR1/ERLIN1
GOBP_MRNA_PROCESSING	GOBP_MRNA_PROCESSING	471	-0.294787	-1.27554	0.00171683	0.04556	0.0394222	3092	tags=35%, list=19%, signal=29%	ZCCHC8/THOC7/SON/PRPF19/SUPT6H/RBMX2/HNRNPU/BARD1/HNRNPA1L2/HABP4/CDC5L/PRPF3/HNRNPH3/MFAP1/CTR9/THOC5/PRPF38A/METTL3/LSM5/LSM3/PNN/SNW1/GEMIN5/RBM41/PAPOLG/SRSF3/SNRNP200/PNPT1/CCNT1/SRSF6/SAP18/RBM22/ECD/CDC73/SF3A3/SAFB/SMNDC1/GTF2F2/RBM17/LUC7L2/PSIP1/ACIN1/SRSF4/GEMIN4/NONO/SRPK1/WTAP/ZC3H14/CHTOP/PRPF18/TIA1/GEMIN6/SNRPF/DDX5/SNRPB2/CDK7/DDX47/RBM39/APOBEC2/CPSF3/NCBP2/METTL14/PTBP3/RNF20/S…
GOBP_CD4_POSITIVE_OR_CD8_POSITIVE_ALPHA_BETA_T_CELL_LINEAGE_COMMITMENT	GOBP_CD4_POSITIVE_OR_CD8_POSITIVE_ALPHA_BETA_T_CELL_LINEAGE_COMMITMENT	21	0.714777	1.70537	0.0017476	0.0460734	0.0398665	2024	tags=43%, list=12%, signal=38%	TBX21/BCL2/IL6R/SPN/IL23A/TOX/IL23R/SLAMF6/IL12RB1
GOBP_REGULATION_OF_BONE_REMODELING	GOBP_REGULATION_OF_BONE_REMODELING	44	0.609322	1.68739	0.00175053	0.0460734	0.0398665	2090	tags=25%, list=13%, signal=22%	TNFAIP3/GPR137B/TMEM119/ADAM8/LTBP3/DEF8/CD38/CSK/ATP6AP1/S1PR1/GPR137
GOBP_CELLULAR_RESPONSE_TO_REACTIVE_OXYGEN_SPECIES	GOBP_CELLULAR_RESPONSE_TO_REACTIVE_OXYGEN_SPECIES	136	0.474856	1.54709	0.00177781	0.0466004	0.0403225	4006	tags=44%, list=24%, signal=34%	KLF2/FOS/TNFAIP3/NR4A3/CRK/MAPK7/JUN/DNM2/RHOB/MAPK3/STK25/GCH1/ROMO1/RIPK3/MMP9/MAP1LC3A/PRKCD/PRDX2/AKT1/SIGMAR1/KDM6B/PINK1/NFE2L2/CCS/CAMKK2/CBX8/ZNF580/PRDX5/ENDOG/PPP5C/IL10/PXN/FBLN5/ANXA1/TXN/RELA/PRDX1/RPS3/HSF1/HDAC6/MAPK1/DHFR/ABL1/ETS1/TRAF2/FOXO1/PARK7/NCF1/PDK2/MAPK13/IL18RAP/CYP1B1/MPV17/TRAP1/MIR21/KLF4/SPHK1/PRDX3/PYCR1/FXN
GOBP_RESPIRATORY_SYSTEM_DEVELOPMENT	GOBP_RESPIRATORY_SYSTEM_DEVELOPMENT	164	0.455432	1.51138	0.00182734	0.047704	0.0412774	1675	tags=16%, list=10%, signal=14%	KLF2/MAP2K1/SREBF1/MSC/RARG/RAB3A/TNF/THRA/MAPK3/ADA/STK40/JMJD6/TULP3/LIF/BAG6/CTSH/LTBP3/PPP1CA/TGFBR2/CHD7/TAB1/SKI/EIF4EBP1/TIMELESS/DAG1/LEF1
GOMF_14_3_3_PROTEIN_BINDING	GOMF_14_3_3_PROTEIN_BINDING	28	0.673198	1.70841	0.00184266	0.0479093	0.041455	1627	tags=32%, list=10%, signal=29%	SIK1/ZFP36/DDIT4/ARRB2/PRKCZ/HDAC7/AKT1/TBC1D22A/ZFP36L1
GOMF_PROTEIN_TYROSINE_SERINE_THREONINE_PHOSPHATASE_ACTIVITY	GOMF_PROTEIN_TYROSINE_SERINE_THREONINE_PHOSPHATASE_ACTIVITY	42	0.623659	1.70905	0.00186141	0.048008	0.0415404	2035	tags=33%, list=12%, signal=29%	DUSP5/DUSP2/DUSP1/PTP4A3/SBF1/DUSP28/DUSP16/DUSP22/DUSP3/SSH3/DUSP6/PTP4A1/DUSP4/DUSP23
GOBP_MYELOID_CELL_HOMEOSTASIS	GOBP_MYELOID_CELL_HOMEOSTASIS	135	0.464559	1.51542	0.00186048	0.048008	0.0415404	2272	tags=28%, list=14%, signal=24%	KLF2/ZFP36/HMGB2/PDE4B/LDB1/THRA/MAPK14/PRMT1/BAX/SH2B3/STAT5B/JMJD6/CDK6/ISG15/FAM210B/RCOR1/ZNF16/BCL6/ADD1/SPI1/PIK3CD/HSPA1B/G6PD/FOXO3/BCL2L11/NCSTN/TMEM14C/ZBTB7A/BAP1/ZFP36L1/KLF13/ANKRD54/SRF/HCLS1/PKNOX1/ANXA1/MIR221/MAFB
GOBP_MYOBLAST_FUSION	GOBP_MYOBLAST_FUSION	32	0.653758	1.70459	0.00190202	0.0485509	0.0420102	3849	tags=50%, list=23%, signal=38%	MAPK14/CD81/WNT1/NFATC2/ADAM12/EHD1/PLEKHO1/DYRK1B/SCGB3A1/IL4R/CXCL10/MYH9/TANC1/CD53/FLOT1/CD9
GOBP_RESPONSE_TO_ISOQUINOLINE_ALKALOID	GOBP_RESPONSE_TO_ISOQUINOLINE_ALKALOID	24	0.691753	1.69221	0.00191536	0.0485509	0.0420102	2313	tags=33%, list=14%, signal=29%	FOSB/ADA/PPP1R9B/CXCR4/MAP1LC3A/PEA15/PPP5C/RELA
GOBP_OLIGODENDROCYTE_DIFFERENTIATION	GOBP_OLIGODENDROCYTE_DIFFERENTIATION	76	0.529976	1.59928	0.00190838	0.0485509	0.0420102	3290	tags=36%, list=20%, signal=29%	B4GALT5/CLU/TSPAN2/CXCR4/TPPP/HDAC10/CDK5/TNFRSF1B/ABCA2/GSN/NCSTN/CSK/DAG1/WDR1/EIF2B5/CNTNAP1/NSUN5/HES1/EIF2B4/HDAC1/EIF2B2/PRDM8/EIF2B3/GSTP1/ERCC2/NOTCH1/LYN
GOMF_PROTEIN_SERINE_PHOSPHATASE_ACTIVITY	GOMF_PROTEIN_SERINE_PHOSPHATASE_ACTIVITY	70	0.53145	1.58551	0.00191627	0.0485509	0.0420102	2484	tags=37%, list=15%, signal=32%	DUSP5/DUSP2/DUSP1/CTDP1/PPM1B/DUSP28/CTDSP1/PPP4C/CTDNEP1/PPP1CA/DUSP16/DUSP22/DUSP3/SSH3/DUSP6/PPM1M/PHLPP2/PPP3CA/CTDSP2/CPPED1/DUSP4/DUSP23/PPP5C/SSU72/PPM1N/PPM1F
GOBP_REGULATION_OF_ACTIN_FILAMENT_BASED_PROCESS	GOBP_REGULATION_OF_ACTIN_FILAMENT_BASED_PROCESS	335	0.398759	1.39628	0.00192026	0.0485509	0.0420102	2899	tags=25%, list=18%, signal=21%	PDXP/CAPG/MYADM/CRK/HRAS/PDE4B/PTGER4/RHOB/ARPC1B/WAS/PREX1/ARHGDIA/PYCARD/CCR7/MLST8/RAC2/NCK2/PHPT1/SMAD3/FSCN1/DBNL/PFN1/FLNA/RHOG/PICK1/ADD1/CDK5/TNNC1/FMN1/PRKCD/CORO1A/CAPZB/PPFIA1/ARHGEF18/ARHGAP35/SSH3/ARPC4/SORBS3/ARHGEF19/GSN/HAX1/ARAP1/RND1/WHAMM/S100A10/GMFG/RHOH/WDR1/TMSB4X/PDE4D/ACTG1/TMSB10/ID1/TRIOBP/TESK1/CNN2/IQGAP2/S1PR1/MYO1C/HCLS1/CORO1B/RHOF/PXN/VASP/ATP1A1/BST2/HIP1R/PIK3R1…
GOBP_POSITIVE_REGULATION_OF_ANTIGEN_RECEPTOR_MEDIATED_SIGNALING_PATHWAY	GOBP_POSITIVE_REGULATION_OF_ANTIGEN_RECEPTOR_MEDIATED_SIGNALING_PATHWAY	18	0.739835	1.72242	0.00195089	0.0491318	0.0425129	2381	tags=56%, list=14%, signal=48%	PRKD2/ADA/CD81/CCR7/KCNN4/PRKCB/CARD11/RELA/RPS3/LCK
GOBP_LYMPHOCYTE_MEDIATED_IMMUNITY	GOBP_LYMPHOCYTE_MEDIATED_IMMUNITY	218	0.426723	1.44812	0.00198327	0.0497522	0.0430497	3309	tags=27%, list=20%, signal=22%	BCL3/TBX21/SMAD7/TGFB1/CRK/CCR6/TNF/ARRB2/CLU/WAS/NLRP3/CD81/STAT5B/LTA/PRKCZ/LAG3/RIPK3/CD55/EXOSC6/CTSH/FUT7/BCL6/UNC13D/FCER1G/PRKCD/CORO1A/IL23A/CD27/IRF7/CLCF1/MYO1G/TNFRSF1B/IL23R/IL1B/LAMP1/CD74/SLAMF6/TCIRG1/IL12RB1/IL10/IGLL5/VAV1/ERCC1/IL4R/IL27RA/ULBP2/TUBB4B/PTPN6/LGALS9/PRF1/TRAF2/GZMM/ICAM1/NOD2/FADD/MYD88/C1QA/SLA2/CCR2
