# Supplementary material for: Identification and analysis of lipid metabolism-related genes in allergic rhinitis
Source: Lipids Health Dis. 2023 Jul 21;22:105. doi: 10.1186/s12944-023-01825-z (PMC10362667; doi:10.1186/s12944-023-01825-z)
Supplement: Supplementary file 4 — Supplementary Materials 4: Table S4. Results of the 33 Kyoto Encyclopedia of Genes and Genomes (KEGG) enriched terms using GSEA [file 12944_2023_1825_MOESM4_ESM.xlsx]

## Sheet: Sheet1
ID	Description	setSize	enrichmentScore	NES	pvalue	p.adjust	qvalues	rank	leading_edge	core_enrichment
KEGG_MAPK_SIGNALING_PATHWAY	KEGG_MAPK_SIGNALING_PATHWAY	241	0.556342	1.93319	1.09838e-10	1.99905e-08	1.5146e-08	2162	tags=30%, list=13%, signal=26%	DUSP5/DUSP2/FOS/GADD45G/MAP2K1/DUSP1/GADD45B/NR4A1/GADD45A/PRKX/NFKB2/NFKB1/TGFB1/CRK/HRAS/MAP2K2/RPS6KA4/MAPK7/JUN/MAP3K8/JUND/TNF/FGFR1/ARRB2/MAPK3/MKNK2/MAPK14/RASGRP2/PPM1B/RRAS/CD14/RAC2/DDIT3/TP53/RRAS2/DUSP16/FLNA/RELB/FASLG/MAP2K7/MAP2K4/AKT1/HSPA1B/DUSP3/TGFBR2/NFATC2/PRKCB/TAB1/DUSP6/IL1B/CDC25B/HSPB1/MAP2K3/PLA2G6/MAPKAPK3/AKT2/CACNA2D2/MAP4K2/IKBKG/PPP3CA/MAP3K4/MAPK11/MAPKAPK2/MAP4K1…
KEGG_CHEMOKINE_SIGNALING_PATHWAY	KEGG_CHEMOKINE_SIGNALING_PATHWAY	165	0.530145	1.77653	2.24986e-06	0.000204737	0.000155122	3533	tags=39%, list=21%, signal=31%	GNB2/GRK6/MAP2K1/PRKX/XCL2/CCR9/NFKB1/CXCR5/CRK/HRAS/CCR6/PLCB2/NFKBIA/PIK3R2/ARRB2/MAPK3/WAS/GNAI2/RASGRP2/PREX1/STAT5B/CCR7/CXCR4/CCL20/RAC2/ADCY3/PRKCZ/CCR4/PIK3R5/CCR5/CCL3/PIK3CD/PRKCD/AKT1/CCR10/FOXO3/CXCR6/PRKCB/CSK/AKT2/IKBKG/CXCL16/GNB1/PXN/VAV1/RELA/PIK3R1/CXCL10/MAPK1/NFKBIB/PLCB3/IKBKB/CXCR3/GNG7/PPBP/NCF1/GNG10/LYN/CCR2/PAK1/RAC1/CCL5/ITK/PRKACA
KEGG_NEUROTROPHIN_SIGNALING_PATHWAY	KEGG_NEUROTROPHIN_SIGNALING_PATHWAY	121	0.563513	1.818	3.93778e-06	0.000238892	0.000181	2611	tags=36%, list=16%, signal=30%	NFKBIE/MAP2K1/NFKB1/YWHAH/CRK/HRAS/MAP2K2/RPS6KA4/MAPK7/JUN/NFKBIA/PIK3R2/BCL2/MAPK3/MAPK14/BAX/SH2B3/ARHGDIA/SH2B1/IRAK1/TP53/PRDM4/PIK3R5/CALM3/FASLG/MAP2K7/PIK3CD/PRKCD/AKT1/FOXO3/RAPGEF1/CSK/AKT2/MAPK11/MAPKAPK2/MAP3K3/RPS6KA1/SH2B2/RELA/PIK3R1/ARHGDIB/MAPK1/ABL1
KEGG_CYTOKINE_CYTOKINE_RECEPTOR_INTERACTION	KEGG_CYTOKINE_CYTOKINE_RECEPTOR_INTERACTION	226	0.479278	1.65338	2.38819e-05	0.00108663	0.000823298	1391	tags=17%, list=8%, signal=16%	OSM/TNFRSF4/XCL2/CCR9/TGFB1/ACVR1/CXCR5/TNFSF12/TNFRSF18/CCR6/TNF/IL21R/TNFSF14/LTB/IL22/FLT3LG/CCR7/LTA/LIF/CXCR4/TNFRSF25/CCL20/CCR4/IL6R/IL26/IL17RA/CCR5/IL2RG/FASLG/CCL3/IL23A/CD27/CCR10/TGFBR2/CXCR6/CLCF1/TNFRSF1B/IL23R/IL1B
KEGG_PROTEIN_EXPORT	KEGG_PROTEIN_EXPORT	22	-0.76147	-2.1033	3.61369e-05	0.0011399	0.000863662	3491	tags=82%, list=21%, signal=65%	IMMP2L/SEC62/SEC11C/SEC61B/SEC61A1/HSPA5/SPCS1/SRP14/SRP54/SPCS3/SRP72/SPCS2/SRP19/SEC11A/SEC61G/SRP9/SEC63/SEC61A2
KEGG_B_CELL_RECEPTOR_SIGNALING_PATHWAY	KEGG_B_CELL_RECEPTOR_SIGNALING_PATHWAY	74	0.597142	1.82373	3.75792e-05	0.0011399	0.000863662	2948	tags=45%, list=18%, signal=37%	NFKBIE/FOS/MAP2K1/NFKB1/HRAS/MAP2K2/JUN/NFKBIA/PIK3R2/MAPK3/CD81/RAC2/PIK3R5/PIK3CD/AKT1/NFATC2/PRKCB/CARD11/IFITM1/AKT2/IKBKG/PPP3CA/VAV1/RELA/CD79B/PIK3R1/NFATC1/MAPK1/PTPN6/NFKBIB/PIK3AP1/IKBKB/CD79A
KEGG_TOLL_LIKE_RECEPTOR_SIGNALING_PATHWAY	KEGG_TOLL_LIKE_RECEPTOR_SIGNALING_PATHWAY	93	0.558844	1.75454	9.6086e-05	0.00249823	0.00189282	1806	tags=33%, list=11%, signal=30%	FOS/MAP2K1/TICAM1/NFKB1/MAP2K2/JUN/MAP3K8/TNF/NFKBIA/PIK3R2/MAPK3/MAPK14/CD14/IRAK1/IRF3/TOLLIP/PIK3R5/IKBKE/CCL3/MAP2K7/PIK3CD/MAP2K4/AKT1/IRF7/IRF5/TAB1/IL1B/MAP2K3/AKT2/IKBKG/MAPK11
KEGG_CHRONIC_MYELOID_LEUKEMIA	KEGG_CHRONIC_MYELOID_LEUKEMIA	73	0.573265	1.74239	0.000380126	0.00855453	0.00648146	2611	tags=44%, list=16%, signal=37%	CDKN1A/MAP2K1/NFKB1/TGFB1/CRK/HRAS/MAP2K2/NFKBIA/PIK3R2/MAPK3/STAT5B/CDK6/TP53/SMAD3/CTBP1/PIK3R5/PIK3CD/AKT1/TGFBR2/BCR/AKT2/IKBKG/CDK4/GAB2/BCL2L1/RELA/PIK3R1/RUNX1/E2F1/MAPK1/HDAC1/ABL1
KEGG_ADIPOCYTOKINE_SIGNALING_PATHWAY	KEGG_ADIPOCYTOKINE_SIGNALING_PATHWAY	65	0.577981	1.72343	0.000470029	0.00855453	0.00648146	2980	tags=34%, list=18%, signal=28%	NFKBIE/SOCS3/NFKB1/TNF/NFKBIA/TRADD/POMC/RXRB/PRKCQ/STK11/AKT1/TNFRSF1B/AKT2/CAMKK2/IKBKG/PRKAG1/RELA/SLC2A1/NFKBIB/TRAF2/IKBKB/PRKAB1
KEGG_T_CELL_RECEPTOR_SIGNALING_PATHWAY	KEGG_T_CELL_RECEPTOR_SIGNALING_PATHWAY	106	0.526195	1.66924	0.000458516	0.00855453	0.00648146	3380	tags=46%, list=20%, signal=37%	NFKBIE/FOS/PDCD1/MAP2K1/NFKB1/HRAS/MAP2K2/JUN/MAP3K8/TNF/NFKBIA/PIK3R2/MAPK3/MAPK14/PRKCQ/NCK2/PIK3R5/MAP2K7/PIK3CD/AKT1/NFATC2/CARD11/LAT/AKT2/IKBKG/PPP3CA/CD3E/MAPK11/CDK4/IL10/CD3D/VAV1/RELA/ZAP70/PIK3R1/LCK/NFATC1/GRAP2/MAPK1/PTPN6/NFKBIB/PAK3/IKBKB/CD247/CD4/ICOS/CD8B/PAK1/MAPK13
KEGG_FC_GAMMA_R_MEDIATED_PHAGOCYTOSIS	KEGG_FC_GAMMA_R_MEDIATED_PHAGOCYTOSIS	91	0.526532	1.64083	0.000629544	0.0102577	0.00777188	3386	tags=38%, list=21%, signal=31%	MARCKSL1/MAP2K1/CRK/DNM2/PIP5K1C/PIK3R2/MAPK3/ARPC1B/WAS/RAC2/CFL1/PIK3R5/PIK3CD/PRKCD/AKT1/PRKCB/ARPC4/GSN/LAT/PLA2G6/AKT2/PLD2/SPHK2/GAB2/VASP/VAV1/PIK3R1/MAPK1/ARF6/LIMK1/NCF1/LYN/PAK1/RAC1/RPS6KB2
KEGG_PATHWAYS_IN_CANCER	KEGG_PATHWAYS_IN_CANCER	300	0.417759	1.47478	0.000676332	0.0102577	0.00777188	3095	tags=24%, list=19%, signal=20%	CDKN1A/FOS/MAP2K1/NFKB2/NFKB1/TGFB1/CRK/HRAS/MAP2K2/JUN/FGFR1/NFKBIA/TRAF4/PIK3R2/RARA/BCL2/MAPK3/BAX/WNT1/FLT3LG/STAT5B/CDK6/RXRB/WNT10A/RAC2/TP53/SMAD3/CTBP1/PIK3R5/CCNE1/DVL1/BIRC5/FASLG/MMP9/RALGDS/SPI1/WNT7A/PIK3CD/AKT1/TGFBR2/PRKCB/EGLN1/BCR/RALBP1/AKT2/IKBKG/LEF1/TRAF1/PIAS4/CDK4/TCF7/BCL2L1/RELA/PIK3R1/SLC2A1/RUNX1/VEGFB/E2F1/PPARD/MAPK1/HDAC1/ABL1/ETS1/GSTP1/TRAF3/TRAF2/IKBKB/CASP9/ITGA6…
KEGG_GLYCOSAMINOGLYCAN_BIOSYNTHESIS_CHONDROITIN_SULFATE	KEGG_GLYCOSAMINOGLYCAN_BIOSYNTHESIS_CHONDROITIN_SULFATE	21	0.741666	1.81802	0.00079879	0.0111831	0.00847299	3239	tags=57%, list=20%, signal=46%	CHST11/B3GALT6/B3GAT3/CHPF/CHST14/CHPF2/XYLT1/B4GALT7/CHSY1/XYLT2/UST/CHST12
KEGG_TYPE_II_DIABETES_MELLITUS	KEGG_TYPE_II_DIABETES_MELLITUS	42	0.625577	1.73833	0.00147049	0.0191164	0.0144838	1137	tags=21%, list=7%, signal=20%	SOCS1/SOCS3/TNF/PIK3R2/MAPK3/PRKCZ/PIK3R5/PIK3CD/PRKCD
KEGG_GLYCEROLIPID_METABOLISM	KEGG_GLYCEROLIPID_METABOLISM	41	0.620275	1.72139	0.00192928	0.0234086	0.0177359	2457	tags=32%, list=15%, signal=27%	DGKZ/AGPAT2/ALDH1B1/GLYCTK/DGAT1/AGPAT1/AKR1B1/AKR1A1/DGKQ/AGPAT3/DGKA/AGPAT4/MBOAT1
KEGG_VEGF_SIGNALING_PATHWAY	KEGG_VEGF_SIGNALING_PATHWAY	68	0.535363	1.611	0.00278519	0.0316815	0.0240039	2558	tags=37%, list=16%, signal=31%	MAP2K1/HRAS/MAP2K2/PIK3R2/MAPK3/MAPK14/RAC2/PIK3R5/SH2D2A/PIK3CD/AKT1/NFATC2/PRKCB/HSPB1/PLA2G6/MAPKAPK3/AKT2/PPP3CA/MAPK11/MAPKAPK2/SPHK2/PXN/PIK3R1/NFATC1/MAPK1
KEGG_DILATED_CARDIOMYOPATHY	KEGG_DILATED_CARDIOMYOPATHY	79	0.522219	1.60855	0.00336461	0.0323629	0.0245202	2120	tags=18%, list=13%, signal=16%	LMNA/PRKX/TGFB1/TNF/ITGB7/ADCY3/EMD/TNNC1/TPM2/ACTB/CACNA2D2/DAG1/ACTG1/GNAS
KEGG_HYPERTROPHIC_CARDIOMYOPATHY_HCM	KEGG_HYPERTROPHIC_CARDIOMYOPATHY_HCM	74	0.519496	1.58659	0.00355636	0.0323629	0.0245202	1878	tags=18%, list=11%, signal=16%	LMNA/TGFB1/TNF/ITGB7/ACE/EMD/TNNC1/TPM2/ACTB/CACNA2D2/DAG1/ACTG1/PRKAG1
KEGG_ERBB_SIGNALING_PATHWAY	KEGG_ERBB_SIGNALING_PATHWAY	83	0.504784	1.55724	0.00343193	0.0323629	0.0245202	1602	tags=23%, list=10%, signal=21%	CDKN1A/MAP2K1/CRK/HRAS/MAP2K2/JUN/AREG/PIK3R2/MAPK3/STAT5B/NCK2/PIK3R5/MAP2K7/PIK3CD/MAP2K4/AKT1/PRKCB/EIF4EBP1/AKT2
KEGG_MELANOGENESIS	KEGG_MELANOGENESIS	93	0.494855	1.55364	0.00339571	0.0323629	0.0245202	2120	tags=22%, list=13%, signal=19%	MAP2K1/PRKX/HRAS/MAP2K2/PLCB2/MAPK3/GNAI2/WNT1/POMC/WNT10A/ADCY3/DVL1/CALM3/CREB3L4/WNT7A/PRKCB/LEF1/MC1R/TCF7/GNAS
KEGG_COLORECTAL_CANCER	KEGG_COLORECTAL_CANCER	62	0.541313	1.59949	0.00375008	0.0325007	0.0246246	1927	tags=32%, list=12%, signal=29%	FOS/MAP2K1/TGFB1/JUN/PIK3R2/BCL2/MAPK3/BAX/RAC2/TP53/SMAD3/PIK3R5/BIRC5/RALGDS/PIK3CD/AKT1/TGFBR2/AKT2/LEF1/TCF7
KEGG_GLYCEROPHOSPHOLIPID_METABOLISM	KEGG_GLYCEROPHOSPHOLIPID_METABOLISM	62	0.538272	1.59051	0.0042156	0.0348745	0.0264231	2457	tags=37%, list=15%, signal=32%	CDIPT/DGKZ/LPCAT1/AGPAT2/MBOAT7/LPGAT1/PTDSS2/CRLS1/PCYT2/PISD/GPD2/AGPAT1/PLA2G6/DGKQ/GPD1L/PLD2/AGPAT3/CHPT1/DGKA/LYPLA2/AGPAT4/PLA2G15/MBOAT1
KEGG_MELANOMA	KEGG_MELANOMA	63	0.540603	1.60474	0.0049123	0.0388712	0.0294513	2558	tags=27%, list=16%, signal=23%	CDKN1A/MAP2K1/HRAS/MAP2K2/FGFR1/PIK3R2/MAPK3/CDK6/TP53/PIK3R5/PIK3CD/AKT1/AKT2/CDK4/PIK3R1/E2F1/MAPK1
KEGG_PANCREATIC_CANCER	KEGG_PANCREATIC_CANCER	68	0.521167	1.56828	0.0052953	0.0394607	0.0298979	2941	tags=38%, list=18%, signal=32%	MAP2K1/NFKB1/TGFB1/PIK3R2/MAPK3/CDK6/RAC2/TP53/SMAD3/PIK3R5/RALGDS/PIK3CD/AKT1/TGFBR2/RALBP1/AKT2/IKBKG/CDK4/BCL2L1/RELA/PIK3R1/VEGFB/E2F1/MAPK1/IKBKB/CASP9
KEGG_LEISHMANIA_INFECTION	KEGG_LEISHMANIA_INFECTION	57	0.536143	1.56046	0.00578716	0.0394607	0.0298979	3380	tags=42%, list=20%, signal=34%	CYBA/FOS/MARCKSL1/NFKB1/TGFB1/JUN/TNF/NFKBIA/MAPK3/MAPK14/IRAK1/PRKCB/TAB1/IL1B/MAPK11/IL10/RELA/MAPK1/PTPN6/NFKBIB/NCF1/MYD88/ITGA4/MAPK13
KEGG_PROSTATE_CANCER	KEGG_PROSTATE_CANCER	84	0.500846	1.54861	0.00567653	0.0394607	0.0298979	2941	tags=32%, list=18%, signal=27%	CDKN1A/MAP2K1/NFKB1/HRAS/MAP2K2/FGFR1/NFKBIA/PIK3R2/BCL2/MAPK3/TP53/PIK3R5/CCNE1/CREB3L4/PIK3CD/AKT1/AKT2/IKBKG/LEF1/TCF7/RELA/PIK3R1/E2F1/MAPK1/GSTP1/IKBKB/CASP9
KEGG_NEUROACTIVE_LIGAND_RECEPTOR_INTERACTION	KEGG_NEUROACTIVE_LIGAND_RECEPTOR_INTERACTION	209	0.410061	1.40596	0.00585406	0.0394607	0.0298979	2490	tags=11%, list=15%, signal=9%	S1PR4/GALR2/C5AR1/PTGER4/THRA/P2RX5/LPAR2/TSPO/ADRB2/S1PR2/F2R/KISS1R/CHRNE/GPR35/MC1R/S1PR1/GZMA/GABBR1/P2RY11/FPR1/OPRL1/C3AR1/TBXA2R
KEGG_ACUTE_MYELOID_LEUKEMIA	KEGG_ACUTE_MYELOID_LEUKEMIA	56	0.537053	1.56743	0.00611593	0.0397535	0.0301198	2558	tags=41%, list=16%, signal=35%	MAP2K1/NFKB1/HRAS/MAP2K2/PIK3R2/RARA/MAPK3/STAT5B/PIK3R5/SPI1/PIK3CD/AKT1/PIM1/EIF4EBP1/AKT2/IKBKG/LEF1/TCF7/RELA/PIK3R1/RUNX1/PPARD/MAPK1
KEGG_PRIMARY_IMMUNODEFICIENCY	KEGG_PRIMARY_IMMUNODEFICIENCY	35	0.612509	1.65893	0.00693066	0.0423356	0.0320762	3655	tags=46%, list=22%, signal=36%	RFXAP/ADA/RFXANK/IL2RG/IKBKG/CD3E/RFX5/CD3D/ZAP70/LCK/TNFRSF13C/CD79A/CD4/ICOS/CD8B/CD40LG
KEGG_PYRIMIDINE_METABOLISM	KEGG_PYRIMIDINE_METABOLISM	94	0.485895	1.5226	0.0069784	0.0423356	0.0320762	3669	tags=49%, list=22%, signal=38%	TYMP/TK1/POLR2L/NME1/NME3/ITPA/DUT/NUDT2/RRM2/POLR2J2/NT5C/POLR2G/NME6/POLD2/POLD1/UPP1/POLR2E/POLE4/NME2/POLD4/POLR2A/TYMS/POLR3H/CAD/POLR2F/POLE/POLR2C/POLR3K/UCKL1/POLR1C/NT5E/UCK2/POLR2D/CANT1/UMPS/DHODH/PNP/TXNRD2/CMPK1/ENTPD1/UCK1/DTYMK/TK2/POLR1E/POLR2I/ENTPD6
KEGG_FC_EPSILON_RI_SIGNALING_PATHWAY	KEGG_FC_EPSILON_RI_SIGNALING_PATHWAY	72	0.508865	1.54177	0.00728504	0.0427702	0.0324054	2558	tags=35%, list=16%, signal=29%	MAP2K1/HRAS/MAP2K2/TNF/PIK3R2/MAPK3/MAPK14/RAC2/PIK3R5/MAP2K7/FCER1G/PIK3CD/PRKCD/MAP2K4/AKT1/PRKCB/MAP2K3/LAT/PLA2G6/AKT2/MAPK11/GAB2/VAV1/PIK3R1/MAPK1
KEGG_GNRH_SIGNALING_PATHWAY	KEGG_GNRH_SIGNALING_PATHWAY	88	0.480844	1.49345	0.00820986	0.0466936	0.035378	2120	tags=26%, list=13%, signal=23%	MAP2K1/PRKX/HRAS/MAP2K2/MAPK7/JUN/PLCB2/MAPK3/MAPK14/ADCY3/CALM3/MAP2K7/PRKCD/MAP2K4/PRKCB/MAP2K3/PLA2G6/MAP3K4/MAPK11/PLD2/HBEGF/MAP3K3/GNAS
KEGG_GLIOMA	KEGG_GLIOMA	62	0.519685	1.53559	0.00857679	0.0473023	0.0358392	2558	tags=29%, list=16%, signal=25%	CDKN1A/MAP2K1/HRAS/MAP2K2/PIK3R2/MAPK3/CDK6/TP53/PIK3R5/CALM3/PIK3CD/AKT1/PRKCB/AKT2/CDK4/PIK3R1/E2F1/MAPK1
